# Supplementary material for: Oral Health-Related Quality of Life in Adolescents as Measured with the Child-OIDP Questionnaire: A Systematic Review
Source: MDPI journal article supplement (doi:10.3390/ijerph182412995), 2021-12-09
Supplement: s1 [file s1]

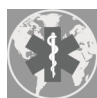

# Supplementary Material

*Figure S1: PRISMA Guidelines 2020.*

*Figure S2: Prospero Registration.*

*Figure S3: Search strategy 28/7/21.*

*Figure S4: Articles excluded and reasons for exclusion.*

*Table S1: Strobe 23 articles.*

*Table S2: Evidence tables.*

| Section and Topic    | Item # | Checklist item                                                                                                                                                                                                                                                                   | Location where item is reported |
|----------------------|--------|----------------------------------------------------------------------------------------------------------------------------------------------------------------------------------------------------------------------------------------------------------------------------------|---------------------------------|
| <b>TITLE</b>         |        |                                                                                                                                                                                                                                                                                  |                                 |
| Title                | 1      | Identify the report as a systematic review.                                                                                                                                                                                                                                      | p. 1                            |
| <b>ABSTRACT</b>      |        |                                                                                                                                                                                                                                                                                  |                                 |
| Abstract             | 2      | See the PRISMA 2020 for Abstracts checklist.                                                                                                                                                                                                                                     | p. 1                            |
| <b>INTRODUCTION</b>  |        |                                                                                                                                                                                                                                                                                  |                                 |
| Rationale            | 3      | Describe the rationale for the review in the context of existing knowledge.                                                                                                                                                                                                      | pp. 1-2                         |
| Objectives           | 4      | Provide an explicit statement of the objective(s) or question(s) the review addresses.                                                                                                                                                                                           | p. 2                            |
| <b>METHODS</b>       |        |                                                                                                                                                                                                                                                                                  |                                 |
| Eligibility criteria | 5      | Specify the inclusion and exclusion criteria for the review and how studies were grouped for the syntheses.                                                                                                                                                                      | p. 3                            |
| Information sources  | 6      | Specify all databases, registers, websites, organisations, reference lists and other sources searched or consulted to identify studies. Specify the date when each source was last searched or consulted.                                                                        | pp. 2-3                         |
| Search strategy      | 7      | Present the full search strategies for all databases, registers and websites, including any filters and limits used.                                                                                                                                                             | pp. 2-3                         |
| Selection process    | 8      | Specify the methods used to decide whether a study met the inclusion criteria of the review, including how many reviewers screened each record and each report retrieved, whether they worked independently, and if applicable, details of automation tools used in the process. | pp. 2-3                         |

| Section and Topic             | Item # | Checklist item                                                                                                                                                                                                                                                                                       | Location where item is reported |
|-------------------------------|--------|------------------------------------------------------------------------------------------------------------------------------------------------------------------------------------------------------------------------------------------------------------------------------------------------------|---------------------------------|
| Data collection process       | 9      | Specify the methods used to collect data from reports, including how many reviewers collected data from each report, whether they worked independently, any processes for obtaining or confirming data from study investigators, and if applicable, details of automation tools used in the process. | pp. 3-4                         |
| Data items                    | 10a    | List and define all outcomes for which data were sought. Specify whether all results that were compatible with each outcome domain in each study were sought (e.g. for all measures, time points, analyses), and if not, the methods used to decide which results to collect.                        | p. 4                            |
|                               | 10b    | List and define all other variables for which data were sought (e.g. participant and intervention characteristics, funding sources). Describe any assumptions made about any missing or unclear information.                                                                                         | p. 4<br>pp. 7-16                |
| Study risk of bias assessment | 11     | Specify the methods used to assess risk of bias in the included studies, including details of the tool(s) used, how many reviewers assessed each study and whether they worked independently, and if applicable, details of automation tools used in the process.                                    | p. 4                            |
| Effect measures               | 12     | Specify for each outcome the effect measure(s) (e.g. risk ratio, mean difference) used in the synthesis or presentation of results.                                                                                                                                                                  |                                 |
| Synthesis methods             | 13a    | Describe the processes used to decide which studies were eligible for each synthesis (e.g. tabulating the study intervention characteristics and comparing against the planned groups for each synthesis (item #5)).                                                                                 |                                 |
|                               | 13b    | Describe any methods required to prepare the data for presentation or synthesis, such as handling of missing summary statistics, or data conversions.                                                                                                                                                |                                 |
|                               | 13c    | Describe any methods used to tabulate or visually display results of individual studies and syntheses.                                                                                                                                                                                               | p. 4                            |
|                               | 13d    | Describe any methods used to synthesize results and provide a rationale for the choice(s). If meta-analysis was performed, describe the model(s), method(s) to identify the presence and extent of statistical heterogeneity, and software package(s) used.                                          |                                 |
|                               | 13e    | Describe any methods used to explore possible causes of heterogeneity among study results (e.g. subgroup analysis, meta-regression).                                                                                                                                                                 |                                 |
|                               | 13f    | Describe any sensitivity analyses conducted to assess robustness of the synthesized results.                                                                                                                                                                                                         |                                 |
| Reporting bias assessment     | 14     | Describe any methods used to assess risk of bias due to missing results in a synthesis (arising from reporting biases).                                                                                                                                                                              |                                 |
| Certainty                     | 15     | Describe any methods used to assess certainty (or confidence) in the body of evidence                                                                                                                                                                                                                |                                 |

| Section and Topic             | Item # | Checklist item                                                                                                                                                                                                                                                                       | Location where item is reported |
|-------------------------------|--------|--------------------------------------------------------------------------------------------------------------------------------------------------------------------------------------------------------------------------------------------------------------------------------------|---------------------------------|
| assessment                    |        | for an outcome.                                                                                                                                                                                                                                                                      |                                 |
| <b>RESULTS</b>                |        |                                                                                                                                                                                                                                                                                      |                                 |
| Study selection               | 16a    | Describe the results of the search and selection process, from the number of records identified in the search to the number of studies included in the review, ideally using a flow diagram.                                                                                         | pp. 4-6                         |
|                               | 16b    | Cite studies that might appear to meet the inclusion criteria, but which were excluded, and explain why they were excluded.                                                                                                                                                          | pp. 4-5                         |
| Study characteristics         | 17     | Cite each included study and present its characteristics.                                                                                                                                                                                                                            | pp. 7-17                        |
| Risk of bias in studies       | 18     | Present assessments of risk of bias for each included study.                                                                                                                                                                                                                         | pp. 17                          |
| Results of individual studies | 19     | For all outcomes, present, for each study: (a) summary statistics for each group (where appropriate) and (b) an effect estimate and its precision (e.g. confidence/credible interval), ideally using structured tables or plots.                                                     |                                 |
| Results of syntheses          | 20a    | For each synthesis, briefly summarise the characteristics and risk of bias among contributing studies.                                                                                                                                                                               |                                 |
|                               | 20b    | Present results of all statistical syntheses conducted. If meta-analysis was done, present for each the summary estimate and its precision (e.g. confidence/credible interval) and measures of statistical heterogeneity. If comparing groups, describe the direction of the effect. |                                 |
|                               | 20c    | Present results of all investigations of possible causes of heterogeneity among study results.                                                                                                                                                                                       |                                 |
|                               | 20d    | Present results of all sensitivity analyses conducted to assess the robustness of the synthesized results.                                                                                                                                                                           |                                 |
| Reporting biases              | 21     | Present assessments of risk of bias due to missing results (arising from reporting biases) for each synthesis assessed.                                                                                                                                                              |                                 |
| Certainty of evidence         | 22     | Present assessments of certainty (or confidence) in the body of evidence for each outcome assessed.                                                                                                                                                                                  |                                 |
| <b>DISCUSSION</b>             |        |                                                                                                                                                                                                                                                                                      |                                 |
| Discussion                    | 23a    | Provide a general interpretation of the results in the context of other evidence.                                                                                                                                                                                                    | p. 18-19                        |
|                               | 23b    | Discuss any limitations of the evidence included in the review.                                                                                                                                                                                                                      | p. 20                           |
|                               | 23c    | Discuss any limitations of the review processes used.                                                                                                                                                                                                                                | p. 20                           |
|                               | 23d    | Discuss implications of the results for practice, policy, and future research.                                                                                                                                                                                                       | p. 19                           |

| Section and Topic                              | Item # | Checklist item                                                                                                                                                                                                                             | Location where item is reported |
|------------------------------------------------|--------|--------------------------------------------------------------------------------------------------------------------------------------------------------------------------------------------------------------------------------------------|---------------------------------|
| <b>OTHER INFORMATION</b>                       |        |                                                                                                                                                                                                                                            |                                 |
| Registration and protocol                      | 24a    | Provide registration information for the review, including register name and registration number, or state that the review was not registered.                                                                                             | p. 2                            |
|                                                | 24b    | Indicate where the review protocol can be accessed, or state that a protocol was not prepared.                                                                                                                                             | p. 2                            |
|                                                | 24c    | Describe and explain any amendments to information provided at registration or in the protocol.                                                                                                                                            |                                 |
| Support                                        | 25     | Describe sources of financial or non-financial support for the review, and the role of the funders or sponsors in the review.                                                                                                              | p. 20                           |
| Competing interests                            | 26     | Declare any competing interests of review authors.                                                                                                                                                                                         | p. 20                           |
| Availability of data, code and other materials | 27     | Report which of the following are publicly available and where they can be found: template data collection forms; data extracted from included studies; data used for all analyses; analytic code; any other materials used in the review. |                                 |

Figure S1. PRISMA Guidelines 2020.

CRD-REGISTER <irss505@york.ac.uk>

24/12/2020 07:01

## PROSPERO Registration message [222392]

A rossanagreco93@libero.it

Dear Dr Greco,

We apologise for the delay in dealing with your registration, an ever-increasing number of applications has led to a backlog and substantial delays for some users.

PROSPERO is currently prioritising submissions related to COVID-19. To enable us to focus on these submissions, and to avoid additional delay, during the pandemic we will automatically publish submissions that have been waiting more than 30 days for registration.

This applies to your systematic review "Oral health related quality of life in adolescents. A systematic review" which was published on our website on Dec 24, 2020.

The records will be published exactly as submitted, without review by the PROSPERO team, so the public record will indicate:

"To enable PROSPERO to focus on COVID-19 registrations during the 2020 pandemic, this registration record was automatically published exactly as submitted. The PROSPERO team has not checked eligibility"

Review owners have always been responsible for the quality and content of PROSPERO records, and high-quality well-written records will continue to speak for themselves.

Your registration number is: CRD42020222392

You are free to update the record at any time, all submitted changes will be displayed as the latest version with previous versions available to public view. Please also give brief details of the key changes in the Revision notes facility and remember to update your record when your review is published. You can log in to PROSPERO and access your records at <https://www.crd.york.ac.uk/PROSPERO>

Best wishes for the successful completion of your review.

Yours sincerely,

PROSPERO Administrator  
Centre for Reviews and Dissemination  
University of York  
York YO10 5DD  
t: +44 (0) 1904 321049  
e: [CRD-register@york.ac.uk](mailto:CRD-register@york.ac.uk)  
[www.york.ac.uk/inst/crd](http://www.york.ac.uk/inst/crd)

PROSPERO is funded by the National Institute for Health Research and produced by CRD, which is an academic department of the University of York.

Email disclaimer: <https://www.york.ac.uk/docs/disclaimer/email.htm>

Other non-commercial resources that may be of interest

SRDR-Plus is a systematic review data management and archival tool that is available free of charge

<http://sdrplus.ahrq.gov>.

**Figure S2.** Prospero Registration.

|            | Database         | Search strategy                                                                                                                                                                                                                                                                                                                                                                                                                                                                                                                                                                                                                                                                                                                                                                                                                                                                                                                                                                                                                                                                                                                                                                                                                                                                                                                   | Findings                                                       |
|------------|------------------|-----------------------------------------------------------------------------------------------------------------------------------------------------------------------------------------------------------------------------------------------------------------------------------------------------------------------------------------------------------------------------------------------------------------------------------------------------------------------------------------------------------------------------------------------------------------------------------------------------------------------------------------------------------------------------------------------------------------------------------------------------------------------------------------------------------------------------------------------------------------------------------------------------------------------------------------------------------------------------------------------------------------------------------------------------------------------------------------------------------------------------------------------------------------------------------------------------------------------------------------------------------------------------------------------------------------------------------|----------------------------------------------------------------|
| 28/07/2021 | Medline (PubMed) | <p><b>#1</b> oral health quality of life<br/> ("oral health"[MeSH Terms] OR ("oral"[All Fields] AND "health"[All Fields]) OR "oral health"[All Fields]) AND ("quality of life"[MeSH Terms] OR ("quality"[All Fields] AND "life"[All Fields]) OR "quality of life"[All Fields])</p> <p><b>#2</b> adolescents or children or scholars<br/> "adolescences"[All Fields] OR<br/> "adolescence"[All Fields] OR<br/> "adolescent"[MeSH Terms] OR<br/> "adolescent"[All Fields] OR<br/> "adolescence"[All Fields] OR<br/> "adolescents"[All Fields] OR "adolescent s"[All Fields] OR "child"[MeSH Terms] OR<br/> "child"[All Fields] OR "children"[All Fields] OR "child s"[All Fields] OR "children s"[All Fields] OR "childrens"[All Fields] OR "childs"[All Fields] OR "scholar"[All Fields] OR "scholars"[All Fields] OR "scholars"[All Fields]</p> <p><b>#3</b> Child-OIDP or OIDP<br/> "Child-OIDP"[All Fields] OR "OIDP"[All Fields]</p> <p><b>#1 AND #2 AND #3</b><br/> ("oral health"[MeSH Terms] OR ("oral"[All Fields] AND "health"[All Fields])OR "oral health"[All Fields]) AND ("quality of life"[MeSH Terms] OR("quality"[All Fields] AND "life"[All Fields]) OR "quality of life"[All Fields])AND ("adolescences"[All Fields] OR "adolescence"[All Fields] OR "adolescent"[MeSH Terms] OR "adolescent"[All Fields] OR</p> | <p><b>12,951</b></p> <p><b>3,994,971</b></p> <p><b>298</b></p> |

|            |                             |                                                                                                                                                                                                                                                                                                                                                                                                                     |                                                                                         |
|------------|-----------------------------|---------------------------------------------------------------------------------------------------------------------------------------------------------------------------------------------------------------------------------------------------------------------------------------------------------------------------------------------------------------------------------------------------------------------|-----------------------------------------------------------------------------------------|
|            |                             | <p>"adolescence"[All Fields] OR "adolescents"[All Fields] OR "adolescent s"[All Fields] OR ("child"[MeSH Terms] OR "child"[All Fields] OR "children"[All Fields] OR "child s"[All Fields] OR "children s"[All Fields] OR "childrens"[All Fields] OR "childs"[All Fields]) OR ("scholar"[All Fields] OR "scholar s"[All Fields] OR "scholars"[All Fields])) AND ("Child-OIDP"[All Fields] OR "OIDP"[All Fields])</p> | <b><u>140</u></b>                                                                       |
| 28/07/2021 | <b>Scopus</b>               | <p>#1 TITLE-ABS-KEY (oral AND health AND quality AND of AND life)</p> <p>#2 TITLE-ABS-KEY (adolescents OR children OR scholars)</p> <p>#3 TITLE-ABS-KEY (Child-OIDP OR OIDP)</p> <p>#1 TITLE-ABS-KEY (oral AND health AND quality AND of AND life) AND #2 TITLE-ABS-KEY (adolescents OR children OR scholars) AND #3 TITLE-ABS-KEY (Child-OIDP OR OIDP)</p>                                                         | <p><b>14,292</b></p> <p><b>4,641,473</b></p> <p><b>329</b></p> <p><b><u>151</u></b></p> |
| 28/07/2021 | <b>Wos (Web of Science)</b> | <p>#1 TS= oral health quality of life<br/>Indexes=SCI-EXPANDED, SSCI, A&amp;HCI, CPCI-S, CPCI-SSH, BKCI-S, BKCI-SSH, ESCI, CCR-EXPANDED, IC Timespan=All years</p> <p>#2 TS= (adolescents or children or scholars)<br/>Indexes=SCI-EXPANDED, SSCI, A&amp;HCI, CPCI-S, CPCI-SSH, BKCI-S, BKCI-SSH, ESCI, CCR-EXPANDED, IC Timespan=All years</p> <p>#3 TS= (Child-OIDP or OIDP)</p>                                  | <p><b>11,204</b></p> <p><b>2,255,061</b></p>                                            |

|            |        |                                                                                                                                      |            |
|------------|--------|--------------------------------------------------------------------------------------------------------------------------------------|------------|
| 28/07/2021 | Embase | Indexes=SCI-EXPANDED, SSCI, A&HCI, CPCI-S, CPCI-SSH, BKCI-S, BKCI-SSH, ESCI, CCR-EXPANDED, IC Timespan=All years                     | 288        |
|            |        | #1 AND #2 AND #3<br>Indexes=SCI-EXPANDED, SSCI, A&HCI, CPCI-S, CPCI-SSH, BKCI-S, BKCI-SSH, ESCI, CCR-EXPANDED, IC Timespan=All years | <u>131</u> |
|            |        | #1 oral health quality of life<br>oral AND health AND quality AND of AND life                                                        | 30,016     |
|            |        | #2 adolescents or children or scholars<br>adolescents OR children OR scholars                                                        | 3,892,153  |
|            |        | #3 Child-OIDP or OIDP<br>Child-OIDP OR OIDP                                                                                          | 283        |
| 28/07/2021 | Lilacs | #1 AND #2 AND #3<br>oral AND health AND quality AND of AND life AND (adolescents OR children OR scholars) AND (Child-OIDP OR OIDP)   | <u>119</u> |
|            |        | #1 oral health quality of life<br>oral health quality of life                                                                        | 1,494      |
|            |        | #2 adolescents or children or scholars<br>adolescents OR children OR scholars                                                        | 154,464    |
|            |        | #3 Child-OIDP or OIDP<br>Child-OIDP OR OIDP                                                                                          | 73         |
|            |        | #1 AND #2 AND #3                                                                                                                     |            |



|            |        |                                                                                                                            |                  |
|------------|--------|----------------------------------------------------------------------------------------------------------------------------|------------------|
|            |        | (oral health quality of life) AND<br>(adolescents or children or scholars) AND<br>(Child-OIDP or OIDP)                     | <u>28</u>        |
| 28/02/2021 | SciELO | #1 oral health quality of life<br>oral health quality of life                                                              | 651              |
|            |        | #2 adolescents or children or scholars<br>adolescents or children or scholars                                              | 50,739           |
|            |        | #3 Child-OIDP or OIDP<br>Child-OIDP or OIDP                                                                                | 43               |
|            |        | #1 AND #2 AND #3<br>(oral health quality of life) AND<br>(adolescents OR children OR scholars)<br>AND (Child-OIDP OR OIDP) | <u>12</u>        |
|            |        |                                                                                                                            | <b>TOTAL 581</b> |

**Figure S3.** Search Strategy 28/7/21.

|    | Author / Year            | Article Title                                                                                                                                 | Reason for exclusion                                          |
|----|--------------------------|-----------------------------------------------------------------------------------------------------------------------------------------------|---------------------------------------------------------------|
| 1  | <i>Bernabe (2009)</i>    | Impacts on daily performances attributed to malocclusions by British adolescents                                                              | OIDP questionnaire                                            |
| 2  | <i>Chukwumah (2016)</i>  | Impact of dental caries and its treatment on the quality of life of 12- to 15-year-old adolescents in Benin, Nigeria                          | Focus on specific oral conditions (Dental caries focused)     |
| 3  | <i>Freitas (2014)</i>    | Association between dental caries activity, quality of life and obesity in Brazilian adolescents                                              | Focus on specific oral conditions (Dental caries focused)     |
| 4  | <i>Herkrath (2013)</i>   | Comparison of normative methods and the socio-dental approach to assessing orthodontic treatment needs in 12-year-old schoolchildren          | Focus on specific oral conditions (Orthodontics)              |
| 5  | <i>Krisdapong (2013)</i> | Sociodemographic differences in oral health-related quality of life related to dental caries in Thai school children                          | OIDP questionnaire                                            |
| 6  | <i>Krisdapong (2013)</i> | Impacts on quality of life related to dental caries in a national representative sample of Thai 12-and 15-year-olds                           | OIDP questionnaire                                            |
| 7  | <i>Krisdapong (2014)</i> | Associations between perceived needs for dental treatment, oral health-related quality of life and oral diseases in school-aged Thai children | OIDP questionnaire                                            |
| 8  | <i>Krisdapong (2012)</i> | The impacts of gingivitis and calculus on Thai children's quality of life                                                                     | OIDP questionnaire                                            |
| 9  | <i>Krisdapong (2014)</i> | Which aspects of an oral health-related quality of life measure are mainly associated with global ratings of oral health in children          | OIDP questionnaire                                            |
| 10 | <i>Krisdapong (2012)</i> | Impacts of recurrent aphthous stomatitis on quality of life of 12- and 15-year-old Thai children                                              | OIDP questionnaire                                            |
| 11 | <i>Krisdapong (2012)</i> | Setting oral health goals that include oral health-related quality of life measures: a study carried out among adolescents in Thailand        | Condition specific (CS) questionnaire                         |
| 12 | <i>Krisdapong (2012)</i> | Using associations between oral diseases and oral health-related quality of life in a nationally                                              | Objective out of our scope (Oral disease and health planning) |

|    |                          |                                                                                                                                                                                                |                                                                  |
|----|--------------------------|------------------------------------------------------------------------------------------------------------------------------------------------------------------------------------------------|------------------------------------------------------------------|
|    |                          | representative sample to propose oral health goals for 12-year-old children in Thailand                                                                                                        |                                                                  |
| 13 | <i>Krisdapong (2012)</i> | Relationships between oral diseases and impacts on Thai schoolchildren's quality of life: Evidence from a Thai national oral health survey of 12- and 15-year-olds                             | OIDP questionnaire                                               |
| 14 | <i>Krisdapong (2009)</i> | Oral health-related quality of life of 12-and 15-year-old Thai children: Findings from a national survey                                                                                       | OIDP questionnaire                                               |
| 15 | <i>Masjedi (2019)</i>    | Relationship between malocclusion and oral health related quality of life among high school girl students in Ahvaz-Iran                                                                        | OIDP questionnaire                                               |
| 16 | <i>Mbawalla (2011)</i>   | Discriminative ability of the generic and condition-specific Child-Oral Impacts on Daily Performances (Child-OIDP) by the Limpopo-Arusha School Health (LASH) Project: A cross-sectional study | Condition specific (CS) questionnaire                            |
| 17 | <i>Mbwalla (2019)</i>    | Behavioural and sociodemographic determinants of oral health-related quality of life among adolescents in Zanzibar, Tanzania                                                                   | Not validated C-OIDP version                                     |
| 18 | <i>Oliveira (2020)</i>   | Oral health-related quality of life among 12-year-olds: results from SB-Minas Gerais                                                                                                           | OIDP questionnaire                                               |
| 19 | <i>Pasiga (2018)</i>     | Socio-dental and family living condition approach for planning dental care: A Cross-Sectional study among Indonesian students                                                                  | Objective out of our scope                                       |
| 20 | <i>Pau (2008)</i>        | Dental pain and care-seeking in 11-14-yr-old adolescents in a low-income country                                                                                                               | Not validated C-OIDP version (Modified C-OIDP inventory applied) |
| 21 | <i>Pavlovic (2019)</i>   | Oral hygiene habits and prosthodontic treatment needs in younger adolescent population of pančevo, Serbia                                                                                      | OIDP questionnaire                                               |
| 22 | <i>Pentapati (2013)</i>  | Oral health impact, dental caries, and oral health behaviours among the National Cadets Corps in South India                                                                                   | Other population group (National cadets corps)                   |

|    |                           |                                                                                                                                                |                                                               |
|----|---------------------------|------------------------------------------------------------------------------------------------------------------------------------------------|---------------------------------------------------------------|
|    |                           |                                                                                                                                                |                                                               |
| 23 | <i>Perera (2010)</i>      | Social inequality in perceived oral health among Sri Lankan adolescents                                                                        | OIDP questionnaire                                            |
| 24 | <i>Prasertsom (2020)</i>  | Condition-Specific Oral Health Impacts in Thai Children and Adolescents: Findings From the National Oral Health-Related Quality of Life Survey | OIDP questionnaire                                            |
| 25 | <i>Ramos Jorge (2014)</i> | Impact of treated/untreated traumatic dental injuries on quality of life among Brazilian schoolchildren                                        | Focus on specific oral conditions (Traumatic dental injuries) |
| 26 | <i>Ravaghi (2019)</i>     | Socioeconomic Variation in the association between Malocclusion and Oral Health Related Quality of Life                                        | Not validated C-OIDP version                                  |
| 27 | <i>Silva Souza (2018)</i> | Impact of untreated dental caries on the daily activities of children                                                                          | OIDP questionnaire                                            |
| 28 | <i>Sudeep (2014)</i>      | Oral Health Related Quality of Life among 12-15 Year Old Children Residing at Orphanages in South India- A Descriptive Study                   | Objective out of our scope                                    |
| 29 | <i>Tagelsir (2013)</i>    | Oral health of visually impaired schoolchildren in Khartoum State, Sudan                                                                       | Other populations group (visually impaired children)          |
| 30 | <i>Tsakos (2006)</i>      | Can oral health-related quality of life measures substitute for normative needs assessments in 11 to 12-year-old children?                     | Objective out of our scope (validation study)                 |
| 31 | <i>Wu (2021)</i>          | Associated Factors of Oral Health-related Quality of Life in Chinese Adolescents Aged 12-15 Years                                              | Not validated C-OIDP version                                  |

**Figure S4.** Articles excluded after full text analysis and reasons for exclusion.

### Reasons for exclusion:

- Not validated C-OIDP: **4**
- OIDP questionnaire: **15**
- CS questionnaire: **2**
- Focus on specific oral conditions (dental caries, orthodontics, traumatic dental injuries): **4**
- Other population groups, not scholars (National cadets corps, visually impaired children): **2**
- Objective out of our scope: **4**

Table S1. STROBE 23 articles.

**STROBE CHECKLIST CROSS-SECTIONAL STUDIES - ARTICLE 1**

**TITLE:** Planning oral health care using the sociodental approach and the index of family living conditions: a cross-sectional study in Brazilian adolescents

| Alves et al. (2015) |                                                                                                                                                                                                   |          |
|---------------------|---------------------------------------------------------------------------------------------------------------------------------------------------------------------------------------------------|----------|
| Item                | Recommendation                                                                                                                                                                                    | Page n°  |
| <b>1</b>            | <b>Title and Abstract</b>                                                                                                                                                                         | <b>1</b> |
|                     | (a) Indicate the study's design with a commonly used term in the title or the abstract                                                                                                            |          |
|                     | (b) Provide in the abstract an informative and balanced summary of what was done and what was found                                                                                               | 1        |
|                     | <b>Introduction</b>                                                                                                                                                                               |          |
| <b>2</b>            | <i>Background/Rationale</i>                                                                                                                                                                       | 2        |
|                     | Explain the scientific background and rationale for the investigation being reported                                                                                                              |          |
| <b>3</b>            | <i>Objectives</i>                                                                                                                                                                                 | 2        |
|                     | State specific objectives, including any prespecified hypotheses                                                                                                                                  |          |
|                     | <b>Methods</b>                                                                                                                                                                                    |          |
| <b>4</b>            | <i>Study design</i>                                                                                                                                                                               | 2        |
|                     | Present key elements of study design early in the paper                                                                                                                                           |          |
| <b>5</b>            | <i>Setting</i>                                                                                                                                                                                    | 3        |
|                     | Describe the setting, locations, and relevant dates, including periods of recruitment, exposure, follow-up, and data collection                                                                   |          |
| <b>6</b>            | <i>Participants</i>                                                                                                                                                                               | 3        |
|                     | (a) Give the eligibility criteria, and the sources and methods of selection of participants                                                                                                       |          |
| <b>7</b>            | <i>Variables</i>                                                                                                                                                                                  | 3-4      |
|                     | Clearly define all outcomes, exposures, predictors, potential confounders, and effect modifiers. Give diagnostic criteria, if applicable                                                          |          |
| <b>8</b>            | <i>Data sources/measurement</i>                                                                                                                                                                   | 4        |
|                     | For each variable of interest, give sources of data and details of methods of assessment (measurement). Describe comparability of assessment methods if there is more than one group              |          |
| <b>9</b>            | <i>Bias</i>                                                                                                                                                                                       |          |
|                     | Describe any efforts to address potential sources of bias                                                                                                                                         |          |
| <b>10</b>           | <i>Study size</i>                                                                                                                                                                                 | 4        |
|                     | Explain how the study size was arrived at                                                                                                                                                         |          |
| <b>11</b>           | <i>Quantitative variables</i>                                                                                                                                                                     |          |
|                     | Explain how quantitative variables were handled in the analyses. If applicable, describe which groupings were chosen and why                                                                      |          |
| <b>12</b>           | <i>Statistical methods</i>                                                                                                                                                                        | 3-5      |
|                     | (a) Describe all statistical methods, including those used to control for confounding                                                                                                             |          |
|                     | (b) Describe any methods used to examine subgroups and interactions                                                                                                                               | 4        |
|                     | (c) Explain how missing data were addressed                                                                                                                                                       |          |
|                     | (d) If applicable, describe analytical methods taking account of sampling strategy                                                                                                                | 4        |
|                     | (e) Describe any sensitivity analyses                                                                                                                                                             |          |
|                     | <b>Results</b>                                                                                                                                                                                    |          |
| <b>13</b>           | <i>Participants</i>                                                                                                                                                                               |          |
|                     | (a) Report numbers of individuals at each stage of study—eg numbers potentially eligible, examined for eligibility, confirmed eligible, included in the study, completing follow-up, and analysed |          |
|                     | (b) Give reasons for non-participation at each stage                                                                                                                                              |          |
|                     | (c) Consider use of a flow diagram                                                                                                                                                                |          |
| <b>14</b>           | <i>Descriptive data</i>                                                                                                                                                                           | 5        |
|                     | (a) Give characteristics of study participants (eg demographic, clinical, social) and information on exposures and potential confounders                                                          |          |

|                          |                  |                                                                                                                                                                                                              |     |
|--------------------------|------------------|--------------------------------------------------------------------------------------------------------------------------------------------------------------------------------------------------------------|-----|
|                          |                  | (b) Indicate number of participants with missing data for each variable of interest                                                                                                                          |     |
| 15                       | Outcome data     | Report numbers of outcome events or summary measures                                                                                                                                                         | 5-7 |
| 16                       | Main results     | (a) Give unadjusted estimates and, if applicable, confounder-adjusted estimates and their precision (eg, 95% confidence interval). Make clear which confounders were adjusted for and why they were included | 5   |
|                          |                  | (b) Report category boundaries when continuous variables were categorized                                                                                                                                    | 6   |
|                          |                  | (c) If relevant, consider translating estimates of relative risk into absolute risk for a meaningful time period                                                                                             |     |
| 17                       | Other analyses   | Report other analyses done—eg analyses of subgroups and interactions, and sensitivity analyses                                                                                                               |     |
| <b>Discussion</b>        |                  |                                                                                                                                                                                                              |     |
| 18                       | Key results      | Summarise key results with reference to study objectives                                                                                                                                                     | 7-8 |
| 19                       | Limitations      | Discuss limitations of the study, taking into account sources of potential bias or imprecision. Discuss both direction and magnitude of any potential bias                                                   | 9   |
| 20                       | Interpretation   | Give a cautious overall interpretation of results considering objectives, limitations, multiplicity of analyses, results from similar studies, and other relevant evidence                                   | 9   |
| 21                       | Generalisability | Discuss the generalisability (external validity) of the study results                                                                                                                                        | 9   |
| <b>Other information</b> |                  |                                                                                                                                                                                                              |     |
| 22                       | Funding          | Give the source of funding and the role of the funders for the present study and, if applicable, for the original study on which the present article is based                                                |     |
| TOT.                     |                  |                                                                                                                                                                                                              | 17  |

## STROBE CHECKLIST CROSS-SECTIONAL STUDIES - ARTICLE 2

**TITLE:** Association between oral diseases and impact on daily performance among male Saudi schoolchildren

### Alzahrani et al.(2019)

| Item                |                      | Recommendation                                                                                                                  | Page n° |
|---------------------|----------------------|---------------------------------------------------------------------------------------------------------------------------------|---------|
| 1                   | Title and Abstract   | (a) Indicate the study's design with a commonly used term in the title or the abstract                                          | 1       |
|                     |                      | (b) Provide in the abstract an informative and balanced summary of what was done and what was found                             | 1       |
| <b>Introduction</b> |                      |                                                                                                                                 |         |
| 2                   | Background/Rationale | Explain the scientific background and rationale for the investigation being reported                                            | 1-2     |
| 3                   | Objectives           | State specific objectives, including any prespecified hypotheses                                                                | 2       |
| <b>Methods</b>      |                      |                                                                                                                                 |         |
| 4                   | Study design         | Present key elements of study design early in the paper                                                                         | 2       |
| 5                   | Setting              | Describe the setting, locations, and relevant dates, including periods of recruitment, exposure, follow-up, and data collection | 2       |
| 6                   | Participants         | (a) Give the eligibility criteria, and the sources and methods of selection of participants                                     | 2-3     |

|                          |                              |                                                                                                                                                                                                              |           |
|--------------------------|------------------------------|--------------------------------------------------------------------------------------------------------------------------------------------------------------------------------------------------------------|-----------|
| 7                        | Variables                    | Clearly define all outcomes, exposures, predictors, potential confounders, and effect modifiers. Give diagnostic criteria, if applicable                                                                     | 3         |
| 8                        | Data sources/<br>measurement | For each variable of interest, give sources of data and details of methods of assessment (measurement). Describe comparability of assessment methods if there is more than one group                         | 3         |
| 9                        | Bias                         | Describe any efforts to address potential sources of bias                                                                                                                                                    |           |
| 10                       | Study size                   | Explain how the study size was arrived at                                                                                                                                                                    | 3         |
| 11                       | Quantitative variables       | Explain how quantitative variables were handled in the analyses. If applicable, describe which groupings were chosen and why                                                                                 |           |
| 12                       | Statistical methods          | (a) Describe all statistical methods, including those used to control for confounding                                                                                                                        | 4         |
|                          |                              | (b) Describe any methods used to examine subgroups and interactions                                                                                                                                          | 4         |
|                          |                              | (c) Explain how missing data were addressed                                                                                                                                                                  |           |
|                          |                              | (d) If applicable, describe analytical methods taking account of sampling strategy                                                                                                                           | 3         |
|                          |                              | (e) Describe any sensitivity analyses                                                                                                                                                                        |           |
| <b>Results</b>           |                              |                                                                                                                                                                                                              |           |
| 13                       | Participants                 | (a) Report numbers of individuals at each stage of study—eg numbers potentially eligible, examined for eligibility, confirmed eligible, included in the study, completing follow-up, and analysed            | 4         |
|                          |                              | (b) Give reasons for non-participation at each stage                                                                                                                                                         | 4         |
|                          |                              | (c) Consider use of a flow diagram                                                                                                                                                                           |           |
| 14                       | Descriptive data             | (a) Give characteristics of study participants (eg demographic, clinical, social) and information on exposures and potential confounders                                                                     | 4-5       |
|                          |                              | (b) Indicate number of participants with missing data for each variable of interest                                                                                                                          |           |
| 15                       | Outcome data                 | Report numbers of outcome events or summary measures                                                                                                                                                         | 4-8       |
| 16                       | Main results                 | (a) Give unadjusted estimates and, if applicable, confounder-adjusted estimates and their precision (eg, 95% confidence interval). Make clear which confounders were adjusted for and why they were included | 4-8       |
|                          |                              | (b) Report category boundaries when continuous variables were categorized                                                                                                                                    |           |
|                          |                              | (c) If relevant, consider translating estimates of relative risk into absolute risk for a meaningful time period                                                                                             |           |
| 17                       | Other analyses               | Report other analyses done—eg analyses of subgroups and interactions, and sensitivity analyses                                                                                                               |           |
| <b>Discussion</b>        |                              |                                                                                                                                                                                                              |           |
| 18                       | Key results                  | Summarise key results with reference to study objectives                                                                                                                                                     | 8         |
| 19                       | Limitations                  | Discuss limitations of the study, taking into account sources of potential bias or imprecision. Discuss both direction and magnitude of any potential bias                                                   | 9         |
| 20                       | Interpretation               | Give a cautious overall interpretation of results considering objectives, limitations, multiplicity of analyses, results from similar studies, and other relevant evidence                                   | 8-9       |
| 21                       | Generalisability             | Discuss the generalisability (external validity) of the study results                                                                                                                                        | 9         |
| <b>Other information</b> |                              |                                                                                                                                                                                                              |           |
| 22                       | Funding                      | Give the source of funding and the role of the funders for the present study and, if applicable, for the original study on which the present article is based                                                |           |
| <b>TOT.</b>              |                              |                                                                                                                                                                                                              | <b>18</b> |



**STROBE CHECKLIST CROSS-SECTIONAL STUDIES - ARTICLE 3****TITLE:** Impact of school-based dental program performance on the oral health-related quality of life in children**Amalia et al. (2017)**

| Item                | Recommendation                                                                                      |                                                                                                                                                                                                   | Page n°  |
|---------------------|-----------------------------------------------------------------------------------------------------|---------------------------------------------------------------------------------------------------------------------------------------------------------------------------------------------------|----------|
| <b>1</b>            | <b>Title and Abstract</b>                                                                           |                                                                                                                                                                                                   | <b>1</b> |
|                     | (a) Indicate the study's design with a commonly used term in the title or the abstract              |                                                                                                                                                                                                   |          |
|                     | (b) Provide in the abstract an informative and balanced summary of what was done and what was found |                                                                                                                                                                                                   | 1        |
| <b>Introduction</b> |                                                                                                     |                                                                                                                                                                                                   |          |
| <b>2</b>            | <i>Background/Rationale</i>                                                                         | Explain the scientific background and rationale for the investigation being reported                                                                                                              | 1-2      |
| <b>3</b>            | <i>Objectives</i>                                                                                   | State specific objectives, including any prespecified hypotheses                                                                                                                                  | 2        |
| <b>Methods</b>      |                                                                                                     |                                                                                                                                                                                                   |          |
| <b>4</b>            | <i>Study design</i>                                                                                 | Present key elements of study design early in the paper                                                                                                                                           | 2        |
| <b>5</b>            | <i>Setting</i>                                                                                      | Describe the setting, locations, and relevant dates, including periods of recruitment, exposure, follow-up, and data collection                                                                   | 2        |
| <b>6</b>            | <i>Participants</i>                                                                                 | (a) Give the eligibility criteria, and the sources and methods of selection of participants                                                                                                       | 3        |
| <b>7</b>            | <i>Variables</i>                                                                                    | Clearly define all outcomes, exposures, predictors, potential confounders, and effect modifiers. Give diagnostic criteria, if applicable                                                          | 2-4      |
| <b>8</b>            | <i>Data sources/measurement</i>                                                                     | For each variable of interest, give sources of data and details of methods of assessment (measurement). Describe comparability of assessment methods if there is more than one group              | 2-4      |
| <b>9</b>            | <i>Bias</i>                                                                                         | Describe any efforts to address potential sources of bias                                                                                                                                         |          |
| <b>10</b>           | <i>Study size</i>                                                                                   | Explain how the study size was arrived at                                                                                                                                                         |          |
| <b>11</b>           | <i>Quantitative variables</i>                                                                       | Explain how quantitative variables were handled in the analyses. If applicable, describe which groupings were chosen and why                                                                      |          |
| <b>12</b>           | <i>Statistical methods</i>                                                                          | (a) Describe all statistical methods, including those used to control for confounding                                                                                                             | 3-4      |
|                     |                                                                                                     | (b) Describe any methods used to examine subgroups and interactions                                                                                                                               |          |
|                     |                                                                                                     | (c) Explain how missing data were addressed                                                                                                                                                       |          |
|                     |                                                                                                     | (d) If applicable, describe analytical methods taking account of sampling strategy                                                                                                                |          |
|                     |                                                                                                     | (e) Describe any sensitivity analyses                                                                                                                                                             |          |
| <b>Results</b>      |                                                                                                     |                                                                                                                                                                                                   |          |
| <b>13</b>           | <i>Participants</i>                                                                                 | (a) Report numbers of individuals at each stage of study—eg numbers potentially eligible, examined for eligibility, confirmed eligible, included in the study, completing follow-up, and analysed | 4        |
|                     |                                                                                                     | (b) Give reasons for non-participation at each stage                                                                                                                                              |          |
|                     |                                                                                                     | (c) Consider use of a flow diagram                                                                                                                                                                |          |

|                          |                  |                                                                                                                                                                                                                                                                                                                                                                                                               |           |
|--------------------------|------------------|---------------------------------------------------------------------------------------------------------------------------------------------------------------------------------------------------------------------------------------------------------------------------------------------------------------------------------------------------------------------------------------------------------------|-----------|
| 14                       | Descriptive data | (a) Give characteristics of study participants (eg demographic, clinical, social) and information on exposures and potential confounders<br>(b) Indicate number of participants with missing data for each variable of interest                                                                                                                                                                               | 4         |
| 15                       | Outcome data     | Report numbers of outcome events or summary measures                                                                                                                                                                                                                                                                                                                                                          | 4-5       |
| 16                       | Main results     | (a) Give unadjusted estimates and, if applicable, confounder-adjusted estimates and their precision (eg, 95% confidence interval). Make clear which confounders were adjusted for and why they were included<br>(b) Report category boundaries when continuous variables were categorized<br>(c) If relevant, consider translating estimates of relative risk into absolute risk for a meaningful time period |           |
| 17                       | Other analyses   | Report other analyses done—eg analyses of subgroups and interactions, and sensitivity analyses                                                                                                                                                                                                                                                                                                                |           |
| <b>Discussion</b>        |                  |                                                                                                                                                                                                                                                                                                                                                                                                               |           |
| 18                       | Key results      | Summarise key results with reference to study objectives                                                                                                                                                                                                                                                                                                                                                      | 5         |
| 19                       | Limitations      | Discuss limitations of the study, taking into account sources of potential bias or imprecision. Discuss both direction and magnitude of any potential bias                                                                                                                                                                                                                                                    | 6         |
| 20                       | Interpretation   | Give a cautious overall interpretation of results considering objectives, limitations, multiplicity of analyses, results from similar studies, and other relevant evidence                                                                                                                                                                                                                                    | 6         |
| 21                       | Generalisability | Discuss the generalisability (external validity) of the study results                                                                                                                                                                                                                                                                                                                                         | 6         |
| <b>Other information</b> |                  |                                                                                                                                                                                                                                                                                                                                                                                                               |           |
| 22                       | Funding          | Give the source of funding and the role of the funders for the present study and, if applicable, for the original study on which the present article is based                                                                                                                                                                                                                                                 |           |
| <b>TOT.</b>              |                  |                                                                                                                                                                                                                                                                                                                                                                                                               | <b>16</b> |

## STROBE CHECKLIST CROSS-SECTIONAL STUDIES - ARTICLE 4

**TITLE:** Oral Health-Related Quality of Life of School Children Aged 12-17 Years According to the Child-Oral Impacts on Daily Performances Index and the Impact of Oral Health Status on Index Scores

**Athira et al. (2015)**

| Item                | Recommendation                                                                                                                                                                                                             | Page n° |
|---------------------|----------------------------------------------------------------------------------------------------------------------------------------------------------------------------------------------------------------------------|---------|
| 1                   | <b>Title and Abstract</b><br>(a) Indicate the study's design with a commonly used term in the title or the abstract<br>(b) Provide in the abstract an informative and balanced summary of what was done and what was found | 25      |
| <b>Introduction</b> |                                                                                                                                                                                                                            |         |
| 2                   | <i>Background/Rationale</i><br>Explain the scientific background and rationale for the investigation being reported                                                                                                        | 25-26   |
| 3                   | <i>Objectives</i><br>State specific objectives, including any prespecified hypotheses                                                                                                                                      | 26      |
| <b>Methods</b>      |                                                                                                                                                                                                                            |         |

|                          |                                      |                                                                                                                                                                                                                                                                                                                                                                                                               |                      |
|--------------------------|--------------------------------------|---------------------------------------------------------------------------------------------------------------------------------------------------------------------------------------------------------------------------------------------------------------------------------------------------------------------------------------------------------------------------------------------------------------|----------------------|
| 4                        | <i>Study design</i>                  | Present key elements of study design early in the paper                                                                                                                                                                                                                                                                                                                                                       |                      |
| 5                        | <i>Setting</i>                       | Describe the setting, locations, and relevant dates, including periods of recruitment, exposure, follow-up, and data collection                                                                                                                                                                                                                                                                               | 26                   |
| 6                        | <i>Participants</i>                  | (a) Give the eligibility criteria, and the sources and methods of selection of participants                                                                                                                                                                                                                                                                                                                   | 26                   |
| 7                        | <i>Variables</i>                     | Clearly define all outcomes, exposures, predictors, potential confounders, and effect modifiers. Give diagnostic criteria, if applicable                                                                                                                                                                                                                                                                      | 26–27                |
| 8                        | <i>Data sources/<br/>measurement</i> | For each variable of interest, give sources of data and details of methods of assessment (measurement). Describe comparability of assessment methods if there is more than one group                                                                                                                                                                                                                          | 27                   |
| 9                        | <i>Bias</i>                          | Describe any efforts to address potential sources of bias                                                                                                                                                                                                                                                                                                                                                     |                      |
| 10                       | <i>Study size</i>                    | Explain how the study size was arrived at                                                                                                                                                                                                                                                                                                                                                                     | 26                   |
| 11                       | <i>Quantitative variables</i>        | Explain how quantitative variables were handled in the analyses. If applicable, describe which groupings were chosen and why                                                                                                                                                                                                                                                                                  |                      |
| 12                       | <i>Statistical methods</i>           | (a) Describe all statistical methods, including those used to control for confounding<br>(b) Describe any methods used to examine subgroups and interactions<br>(c) Explain how missing data were addressed<br>(d) If applicable, describe analytical methods taking account of sampling strategy<br>(e) Describe any sensitivity analyses                                                                    | 27<br><br><br><br>26 |
| <b>Results</b>           |                                      |                                                                                                                                                                                                                                                                                                                                                                                                               |                      |
| 13                       | <i>Participants</i>                  | (a) Report numbers of individuals at each stage of study—eg numbers potentially eligible, examined for eligibility, confirmed eligible, included in the study, completing follow-up, and analysed<br>(b) Give reasons for non-participation at each stage<br>(c) Consider use of a flow diagram                                                                                                               | 27                   |
| 14                       | <i>Descriptive data</i>              | (a) Give characteristics of study participants (eg demographic, clinical, social) and information on exposures and potential confounders<br>(b) Indicate number of participants with missing data for each variable of interest                                                                                                                                                                               | 27–28                |
| 15                       | <i>Outcome data</i>                  | Report numbers of outcome events or summary measures                                                                                                                                                                                                                                                                                                                                                          |                      |
| 16                       | <i>Main results</i>                  | (a) Give unadjusted estimates and, if applicable, confounder-adjusted estimates and their precision (eg, 95% confidence interval). Make clear which confounders were adjusted for and why they were included<br>(b) Report category boundaries when continuous variables were categorized<br>(c) If relevant, consider translating estimates of relative risk into absolute risk for a meaningful time period | 27–28                |
| 17                       | <i>Other analyses</i>                | Report other analyses done—eg analyses of subgroups and interactions, and sensitivity analyses                                                                                                                                                                                                                                                                                                                |                      |
| <b>Discussion</b>        |                                      |                                                                                                                                                                                                                                                                                                                                                                                                               |                      |
| 18                       | <i>Key results</i>                   | Summarise key results with reference to study objectives                                                                                                                                                                                                                                                                                                                                                      | 28                   |
| 19                       | <i>Limitations</i>                   | Discuss limitations of the study, taking into account sources of potential bias or imprecision. Discuss both direction and magnitude of any potential bias                                                                                                                                                                                                                                                    | 30                   |
| 20                       | <i>Interpretation</i>                | Give a cautious overall interpretation of results considering objectives, limitations, multiplicity of analyses, results from similar studies, and other relevant evidence                                                                                                                                                                                                                                    | 28–29                |
| 21                       | <i>Generalisability</i>              | Discuss the generalisability (external validity) of the study results                                                                                                                                                                                                                                                                                                                                         | 28–29                |
| <b>Other information</b> |                                      |                                                                                                                                                                                                                                                                                                                                                                                                               |                      |

|      |         |                                                                                                                                                               |
|------|---------|---------------------------------------------------------------------------------------------------------------------------------------------------------------|
| 22   | Funding | Give the source of funding and the role of the funders for the present study and, if applicable, for the original study on which the present article is based |
| TOT. |         | 16                                                                                                                                                            |

## STROBE CHECKLIST CROSS-SECTIONAL STUDIES - ARTICLE 5

**TITLE:** Association of Oral Health Indicators with Quality-of-Life Related to Oral Health among Iranian Adolescent.

### Bakhtiar et al. (2014)

| Item                | Recommendation                  |                                                                                                                                                                                                   | Page n° |
|---------------------|---------------------------------|---------------------------------------------------------------------------------------------------------------------------------------------------------------------------------------------------|---------|
| 1                   | <b>Title and Abstract</b>       | (a) Indicate the study's design with a commonly used term in the title or the abstract                                                                                                            | 5       |
|                     |                                 | (b) Provide in the abstract an informative and balanced summary of what was done and what was found                                                                                               | 5       |
| <b>Introduction</b> |                                 |                                                                                                                                                                                                   |         |
| 2                   | <i>Background/Rationale</i>     | Explain the scientific background and rationale for the investigation being reported                                                                                                              | 5       |
| 3                   | <i>Objectives</i>               | State specific objectives, including any prespecified hypotheses                                                                                                                                  | 5-6     |
| <b>Methods</b>      |                                 |                                                                                                                                                                                                   |         |
| 4                   | <i>Study design</i>             | Present key elements of study design early in the paper                                                                                                                                           | 6       |
| 5                   | <i>Setting</i>                  | Describe the setting, locations, and relevant dates, including periods of recruitment, exposure, follow-up, and data collection                                                                   | 6       |
| 6                   | <i>Participants</i>             | (a) Give the eligibility criteria, and the sources and methods of selection of participants                                                                                                       | 6       |
| 7                   | <i>Variables</i>                | Clearly define all outcomes, exposures, predictors, potential confounders, and effect modifiers. Give diagnostic criteria, if applicable                                                          | 6       |
| 8                   | <i>Data sources/measurement</i> | For each variable of interest, give sources of data and details of methods of assessment (measurement). Describe comparability of assessment methods if there is more than one group              | 6       |
| 9                   | <i>Bias</i>                     | Describe any efforts to address potential sources of bias                                                                                                                                         |         |
| 10                  | <i>Study size</i>               | Explain how the study size was arrived at                                                                                                                                                         |         |
| 11                  | <i>Quantitative variables</i>   | Explain how quantitative variables were handled in the analyses. If applicable, describe which groupings were chosen and why                                                                      |         |
| 12                  | <i>Statistical methods</i>      | (a) Describe all statistical methods, including those used to control for confounding                                                                                                             | 6       |
|                     |                                 | (b) Describe any methods used to examine subgroups and interactions                                                                                                                               |         |
|                     |                                 | (c) Explain how missing data were addressed                                                                                                                                                       |         |
|                     |                                 | (d) If applicable, describe analytical methods taking account of sampling strategy                                                                                                                | 6       |
|                     |                                 | (e) Describe any sensitivity analyses                                                                                                                                                             |         |
| <b>Results</b>      |                                 |                                                                                                                                                                                                   |         |
| 13                  | <i>Participants</i>             | (a) Report numbers of individuals at each stage of study—eg numbers potentially eligible, examined for eligibility, confirmed eligible, included in the study, completing follow-up, and analysed | 6       |

|                          |                  |                                                                                                                                                                                                                                                                                                                                                                                                               |           |
|--------------------------|------------------|---------------------------------------------------------------------------------------------------------------------------------------------------------------------------------------------------------------------------------------------------------------------------------------------------------------------------------------------------------------------------------------------------------------|-----------|
|                          |                  | (b) Give reasons for non-participation at each stage                                                                                                                                                                                                                                                                                                                                                          |           |
|                          |                  | (c) Consider use of a flow diagram                                                                                                                                                                                                                                                                                                                                                                            |           |
| 14                       | Descriptive data | (a) Give characteristics of study participants (eg demographic, clinical, social) and information on exposures and potential confounders<br>(b) Indicate number of participants with missing data for each variable of interest                                                                                                                                                                               | 6         |
| 15                       | Outcome data     | Report numbers of outcome events or summary measures                                                                                                                                                                                                                                                                                                                                                          | 6-7       |
| 16                       | Main results     | (a) Give unadjusted estimates and, if applicable, confounder-adjusted estimates and their precision (eg, 95% confidence interval). Make clear which confounders were adjusted for and why they were included<br>(b) Report category boundaries when continuous variables were categorized<br>(c) If relevant, consider translating estimates of relative risk into absolute risk for a meaningful time period | 6-7       |
| 17                       | Other analyses   | Report other analyses done—eg analyses of subgroups and interactions, and sensitivity analyses                                                                                                                                                                                                                                                                                                                |           |
| <b>Discussion</b>        |                  |                                                                                                                                                                                                                                                                                                                                                                                                               |           |
| 18                       | Key results      | Summarise key results with reference to study objectives                                                                                                                                                                                                                                                                                                                                                      | 7         |
| 19                       | Limitations      | Discuss limitations of the study, taking into account sources of potential bias or imprecision. Discuss both direction and magnitude of any potential bias                                                                                                                                                                                                                                                    |           |
| 20                       | Interpretation   | Give a cautious overall interpretation of results considering objectives, limitations, multiplicity of analyses, results from similar studies, and other relevant evidence                                                                                                                                                                                                                                    | 7-8       |
| 21                       | Generalisability | Discuss the generalisability (external validity) of the study results                                                                                                                                                                                                                                                                                                                                         | 7-8       |
| <b>Other information</b> |                  |                                                                                                                                                                                                                                                                                                                                                                                                               |           |
| 22                       | Funding          | Give the source of funding and the role of the funders for the present study and, if applicable, for the original study on which the present article is based                                                                                                                                                                                                                                                 |           |
| <b>TOT.</b>              |                  |                                                                                                                                                                                                                                                                                                                                                                                                               | <b>16</b> |

## STROBE CHECKLIST CROSS-SECTIONAL STUDIES - ARTICLE 6

**TITLE:** Correlation Between Oral Health and Child-OIDP Index in 12-and 15-Year-Old Children From Modinagar, India

**Basavaraj et al. (2014)**

| Item                | Recommendation                                                                                                                                                                                                             | Page n° |
|---------------------|----------------------------------------------------------------------------------------------------------------------------------------------------------------------------------------------------------------------------|---------|
| 1                   | <b>Title and Abstract</b><br>(a) Indicate the study's design with a commonly used term in the title or the abstract<br>(b) Provide in the abstract an informative and balanced summary of what was done and what was found | 1       |
| <b>Introduction</b> |                                                                                                                                                                                                                            |         |
| 2                   | <b>Background/Rationale</b><br>Explain the scientific background and rationale for the investigation being reported                                                                                                        | 1-2     |
| 3                   | <b>Objectives</b><br>State specific objectives, including any prespecified hypotheses                                                                                                                                      | 2       |

| <b>Methods</b>    |                                      |                                                                                                                                                                                                              |     |
|-------------------|--------------------------------------|--------------------------------------------------------------------------------------------------------------------------------------------------------------------------------------------------------------|-----|
| 4                 | <i>Study design</i>                  | Present key elements of study design early in the paper                                                                                                                                                      | 2   |
| 5                 | <i>Setting</i>                       | Describe the setting, locations, and relevant dates, including periods of recruitment, exposure, follow-up, and data collection                                                                              | 2-3 |
| 6                 | <i>Participants</i>                  | (a) Give the eligibility criteria, and the sources and methods of selection of participants                                                                                                                  | 2-3 |
| 7                 | <i>Variables</i>                     | Clearly define all outcomes, exposures, predictors, potential confounders, and effect modifiers. Give diagnostic criteria, if applicable                                                                     | 3-4 |
| 8                 | <i>Data sources/<br/>measurement</i> | For each variable of interest, give sources of data and details of methods of assessment (measurement). Describe comparability of assessment methods if there is more than one group                         | 4   |
| 9                 | <i>Bias</i>                          | Describe any efforts to address potential sources of bias                                                                                                                                                    | 3   |
| 10                | <i>Study size</i>                    | Explain how the study size was arrived at                                                                                                                                                                    | 3   |
| 11                | <i>Quantitative variables</i>        | Explain how quantitative variables were handled in the analyses. If applicable, describe which groupings were chosen and why                                                                                 |     |
| 12                | <i>Statistical methods</i>           | (a) Describe all statistical methods, including those used to control for confounding                                                                                                                        | 4-5 |
|                   |                                      | (b) Describe any methods used to examine subgroups and interactions                                                                                                                                          | 5   |
|                   |                                      | (c) Explain how missing data were addressed                                                                                                                                                                  |     |
|                   |                                      | (d) If applicable, describe analytical methods taking account of sampling strategy                                                                                                                           |     |
|                   |                                      | (e) Describe any sensitivity analyses                                                                                                                                                                        |     |
| <b>Results</b>    |                                      |                                                                                                                                                                                                              |     |
| 13                | <i>Participants</i>                  | (a) Report numbers of individuals at each stage of study—eg numbers potentially eligible, examined for eligibility, confirmed eligible, included in the study, completing follow-up, and analysed            | 5   |
|                   |                                      | (b) Give reasons for non-participation at each stage                                                                                                                                                         |     |
|                   |                                      | (c) Consider use of a flow diagram                                                                                                                                                                           |     |
| 14                | <i>Descriptive data</i>              | (a) Give characteristics of study participants (eg demographic, clinical, social) and information on exposures and potential confounders                                                                     | 5-7 |
|                   |                                      | (b) Indicate number of participants with missing data for each variable of interest                                                                                                                          |     |
| 15                | <i>Outcome data</i>                  | Report numbers of outcome events or summary measures                                                                                                                                                         | 5-7 |
| 16                | <i>Main results</i>                  | (a) Give unadjusted estimates and, if applicable, confounder-adjusted estimates and their precision (eg, 95% confidence interval). Make clear which confounders were adjusted for and why they were included | 5-7 |
|                   |                                      | (b) Report category boundaries when continuous variables were categorized                                                                                                                                    |     |
|                   |                                      | (c) If relevant, consider translating estimates of relative risk into absolute risk for a meaningful time period                                                                                             |     |
| 17                | <i>Other analyses</i>                | Report other analyses done—eg analyses of subgroups and interactions, and sensitivity analyses                                                                                                               |     |
| <b>Discussion</b> |                                      |                                                                                                                                                                                                              |     |
| 18                | <i>Key results</i>                   | Summarise key results with reference to study objectives                                                                                                                                                     | 8   |
| 19                | <i>Limitations</i>                   | Discuss limitations of the study, taking into account sources of potential bias or imprecision. Discuss both direction and magnitude of any potential bias                                                   | 9   |
| 20                | <i>Interpretation</i>                | Give a cautious overall interpretation of results considering objectives, limitations, multiplicity of analyses, results from similar studies, and other relevant evidence                                   | 8-9 |
| 21                | <i>Generalisability</i>              | Discuss the generalisability (external validity) of the study results                                                                                                                                        | 9   |

| Other information |         |                                                                                                                                                               |
|-------------------|---------|---------------------------------------------------------------------------------------------------------------------------------------------------------------|
| 22                | Funding | Give the source of funding and the role of the funders for the present study and, if applicable, for the original study on which the present article is based |
| TOT.              |         | 20                                                                                                                                                            |

## STROBE CHECKLIST CROSS-SECTIONAL STUDIES - ARTICLE 7

TITLE: Intensity and extent of oral impacts on daily performances by type of self-perceived oral problems

Bernabé et al. (2007)

| Item         | Recommendation           |                                                                                                                                                                                                   | Page<br>n° |
|--------------|--------------------------|---------------------------------------------------------------------------------------------------------------------------------------------------------------------------------------------------|------------|
| 1            | Title and Abstract       | (a) Indicate the study’s design with a commonly used term in the title or the abstract                                                                                                            |            |
|              |                          | (b) Provide in the abstract an informative and balanced summary of what was done and what was found                                                                                               | 111        |
| Introduction |                          |                                                                                                                                                                                                   |            |
| 2            | Background/Rationale     | Explain the scientific background and rationale for the investigation being reported                                                                                                              | 111        |
| 3            | Objectives               | State specific objectives, including any prespecified hypotheses                                                                                                                                  | 111        |
| Methods      |                          |                                                                                                                                                                                                   |            |
| 4            | Study design             | Present key elements of study design early in the paper                                                                                                                                           |            |
| 5            | Setting                  | Describe the setting, locations, and relevant dates, including periods of recruitment, exposure, follow-up, and data collection                                                                   | 111-112    |
| 6            | Participants             | (a) Give the eligibility criteria, and the sources and methods of selection of participants                                                                                                       | 111-112    |
| 7            | Variables                | Clearly define all outcomes, exposures, predictors, potential confounders, and effect modifiers. Give diagnostic criteria, if applicable                                                          | 111-112    |
| 8            | Data sources/measurement | For each variable of interest, give sources of data and details of methods of assessment (measurement).                                                                                           | 111-112    |
|              |                          | Describe comparability of assessment methods if there is more than one group                                                                                                                      |            |
| 9            | Bias                     | Describe any efforts to address potential sources of bias                                                                                                                                         |            |
| 10           | Study size               | Explain how the study size was arrived at                                                                                                                                                         | 111        |
| 11           | Quantitative variables   | Explain how quantitative variables were handled in the analyses. If applicable, describe which groupings were chosen and why                                                                      |            |
| 12           | Statistical methods      | (a) Describe all statistical methods, including those used to control for confounding                                                                                                             | 112        |
|              |                          | (b) Describe any methods used to examine subgroups and interactions                                                                                                                               | 112        |
|              |                          | (c) Explain how missing data were addressed                                                                                                                                                       |            |
|              |                          | (d) If applicable, describe analytical methods taking account of sampling strategy                                                                                                                |            |
|              |                          | (e) Describe any sensitivity analyses                                                                                                                                                             |            |
| Results      |                          |                                                                                                                                                                                                   |            |
| 13           | Participants             | (a) Report numbers of individuals at each stage of study—eg numbers potentially eligible, examined for eligibility, confirmed eligible, included in the study, completing follow-up, and analysed | 112        |

|                          |                  |                                                                                                                                                                                                                                                                                                                                                                                                               |         |
|--------------------------|------------------|---------------------------------------------------------------------------------------------------------------------------------------------------------------------------------------------------------------------------------------------------------------------------------------------------------------------------------------------------------------------------------------------------------------|---------|
|                          |                  | (b) Give reasons for non-participation at each stage                                                                                                                                                                                                                                                                                                                                                          |         |
|                          |                  | (c) Consider use of a flow diagram                                                                                                                                                                                                                                                                                                                                                                            |         |
| 14                       | Descriptive data | (a) Give characteristics of study participants (eg demographic, clinical, social) and information on exposures and potential confounders<br>(b) Indicate number of participants with missing data for each variable of interest                                                                                                                                                                               |         |
| 15                       | Outcome data     | Report numbers of outcome events or summary measures                                                                                                                                                                                                                                                                                                                                                          | 112-114 |
| 16                       | Main results     | (a) Give unadjusted estimates and, if applicable, confounder-adjusted estimates and their precision (eg, 95% confidence interval). Make clear which confounders were adjusted for and why they were included<br>(b) Report category boundaries when continuous variables were categorized<br>(c) If relevant, consider translating estimates of relative risk into absolute risk for a meaningful time period | 112-114 |
| 17                       | Other analyses   | Report other analyses done—eg analyses of subgroups and interactions, and sensitivity analyses                                                                                                                                                                                                                                                                                                                |         |
| <b>Discussion</b>        |                  |                                                                                                                                                                                                                                                                                                                                                                                                               |         |
| 18                       | Key results      | Summarise key results with reference to study objectives                                                                                                                                                                                                                                                                                                                                                      | 114     |
| 19                       | Limitations      | Discuss limitations of the study, taking into account sources of potential bias or imprecision. Discuss both direction and magnitude of any potential bias                                                                                                                                                                                                                                                    |         |
| 20                       | Interpretation   | Give a cautious overall interpretation of results considering objectives, limitations, multiplicity of analyses, results from similar studies, and other relevant evidence                                                                                                                                                                                                                                    | 114-115 |
| 21                       | Generalisability | Discuss the generalisability (external validity) of the study results                                                                                                                                                                                                                                                                                                                                         | 115     |
| <b>Other information</b> |                  |                                                                                                                                                                                                                                                                                                                                                                                                               |         |
| 22                       | Funding          | Give the source of funding and the role of the funders for the present study and, if applicable, for the original study on which the present article is based                                                                                                                                                                                                                                                 |         |
| TOT.                     |                  |                                                                                                                                                                                                                                                                                                                                                                                                               | 15      |

## STROBE CHECKLIST CROSS-SECTIONAL STUDIES - ARTICLE 8

TITLE: Prevalence and determinants of oral impacts on daily performance: results from a survey among school children in Italy

Bianco et al. (2009)

| Item                |                      | Recommendation                                                                                                                                                                                | Page n° |
|---------------------|----------------------|-----------------------------------------------------------------------------------------------------------------------------------------------------------------------------------------------|---------|
| 1                   | Title and Abstract   | (a) Indicate the study's design with a commonly used term in the title or the abstract<br>(b) Provide in the abstract an informative and balanced summary of what was done and what was found | 595     |
| <b>Introduction</b> |                      |                                                                                                                                                                                               |         |
| 2                   | Background/Rationale | Explain the scientific background and rationale for the investigation being reported                                                                                                          | 595     |
| 3                   | Objectives           | State specific objectives, including any prespecified hypotheses                                                                                                                              | 595     |
| <b>Methods</b>      |                      |                                                                                                                                                                                               |         |
| 4                   | Study design         | Present key elements of study design early in the paper                                                                                                                                       | 595     |



|                          |                              |                                                                                                                                                                                                                                                                                                                                                                                                               |         |
|--------------------------|------------------------------|---------------------------------------------------------------------------------------------------------------------------------------------------------------------------------------------------------------------------------------------------------------------------------------------------------------------------------------------------------------------------------------------------------------|---------|
| 5                        | Setting                      | Describe the setting, locations, and relevant dates, including periods of recruitment, exposure, follow-up, and data collection                                                                                                                                                                                                                                                                               | 595     |
| 6                        | Participants                 | (a) Give the eligibility criteria, and the sources and methods of selection of participants                                                                                                                                                                                                                                                                                                                   | 595     |
| 7                        | Variables                    | Clearly define all outcomes, exposures, predictors, potential confounders, and effect modifiers. Give diagnostic criteria, if applicable                                                                                                                                                                                                                                                                      | 595-596 |
| 8                        | Data sources/<br>measurement | For each variable of interest, give sources of data and details of methods of assessment (measurement). Describe comparability of assessment methods if there is more than one group                                                                                                                                                                                                                          | 595-596 |
| 9                        | Bias                         | Describe any efforts to address potential sources of bias                                                                                                                                                                                                                                                                                                                                                     |         |
| 10                       | Study size                   | Explain how the study size was arrived at                                                                                                                                                                                                                                                                                                                                                                     | 595     |
| 11                       | Quantitative<br>variables    | Explain how quantitative variables were handled in the analyses. If applicable, describe which groupings were chosen and why                                                                                                                                                                                                                                                                                  |         |
| 12                       | Statistical<br>methods       | (a) Describe all statistical methods, including those used to control for confounding<br>(b) Describe any methods used to examine subgroups and interactions<br>(c) Explain how missing data were addressed<br>(d) If applicable, describe analytical methods taking account of sampling strategy<br>(e) Describe any sensitivity analyses                                                                    | 596     |
| <b>Results</b>           |                              |                                                                                                                                                                                                                                                                                                                                                                                                               |         |
| 13                       | Participants                 | (a) Report numbers of individuals at each stage of study—eg numbers potentially eligible, examined for eligibility, confirmed eligible, included in the study, completing follow-up, and analysed<br>(b) Give reasons for non-participation at each stage<br>(c) Consider use of a flow diagram                                                                                                               | 596     |
| 14                       | Descriptive data             | (a) Give characteristics of study participants (eg demographic, clinical, social) and information on exposures and potential confounders<br>(b) Indicate number of participants with missing data for each variable of interest                                                                                                                                                                               | 596-598 |
| 15                       | Outcome data                 | Report numbers of outcome events or summary measures                                                                                                                                                                                                                                                                                                                                                          | 596-598 |
| 16                       | Main results                 | (a) Give unadjusted estimates and, if applicable, confounder-adjusted estimates and their precision (eg, 95% confidence interval). Make clear which confounders were adjusted for and why they were included<br>(b) Report category boundaries when continuous variables were categorized<br>(c) If relevant, consider translating estimates of relative risk into absolute risk for a meaningful time period | 596-598 |
| 17                       | Other analyses               | Report other analyses done—eg analyses of subgroups and interactions, and sensitivity analyses                                                                                                                                                                                                                                                                                                                |         |
| <b>Discussion</b>        |                              |                                                                                                                                                                                                                                                                                                                                                                                                               |         |
| 18                       | Key results                  | Summarise key results with reference to study objectives                                                                                                                                                                                                                                                                                                                                                      | 598     |
| 19                       | Limitations                  | Discuss limitations of the study, taking into account sources of potential bias or imprecision. Discuss both direction and magnitude of any potential bias                                                                                                                                                                                                                                                    | 599     |
| 20                       | Interpretation               | Give a cautious overall interpretation of results considering objectives, limitations, multiplicity of analyses, results from similar studies, and other relevant evidence                                                                                                                                                                                                                                    | 598-599 |
| 21                       | Generalisability             | Discuss the generalisability (external validity) of the study results                                                                                                                                                                                                                                                                                                                                         | 599     |
| <b>Other information</b> |                              |                                                                                                                                                                                                                                                                                                                                                                                                               |         |

|      |         |                                                                                                                                                               |
|------|---------|---------------------------------------------------------------------------------------------------------------------------------------------------------------|
| 22   | Funding | Give the source of funding and the role of the funders for the present study and, if applicable, for the original study on which the present article is based |
| TOT. |         | 18                                                                                                                                                            |

## STROBE CHECKLIST CROSS-SECTIONAL STUDIES - ARTICLE 9

TITLE: Oral health-related quality of life of 11- and 12-year-old public school children in Rio de Janeiro

### Castro et al. (2011)

| Item | Recommendation                  |                                                                                                                                                                                                                                                                                                                                                                   | Page<br>n° |
|------|---------------------------------|-------------------------------------------------------------------------------------------------------------------------------------------------------------------------------------------------------------------------------------------------------------------------------------------------------------------------------------------------------------------|------------|
| 1    | <b>Title and Abstract</b>       | <p>(a) Indicate the study's design with a commonly used term in the title or the abstract</p> <p>(b) Provide in the abstract an informative and balanced summary of what was done and what was found</p>                                                                                                                                                          | 336        |
|      | <b>Introduction</b>             |                                                                                                                                                                                                                                                                                                                                                                   |            |
| 2    | <i>Background/Rationale</i>     | Explain the scientific background and rationale for the investigation being reported                                                                                                                                                                                                                                                                              | 336-337    |
| 3    | <i>Objectives</i>               | State specific objectives, including any prespecified hypotheses                                                                                                                                                                                                                                                                                                  | 337        |
|      | <b>Methods</b>                  |                                                                                                                                                                                                                                                                                                                                                                   |            |
| 4    | <i>Study design</i>             | Present key elements of study design early in the paper                                                                                                                                                                                                                                                                                                           | 337        |
| 5    | <i>Setting</i>                  | Describe the setting, locations, and relevant dates, including periods of recruitment, exposure, follow-up, and data collection                                                                                                                                                                                                                                   | 337        |
| 6    | <i>Participants</i>             | (a) Give the eligibility criteria, and the sources and methods of selection of participants                                                                                                                                                                                                                                                                       | 337        |
| 7    | <i>Variables</i>                | Clearly define all outcomes, exposures, predictors, potential confounders, and effect modifiers. Give diagnostic criteria, if applicable                                                                                                                                                                                                                          | 337-338    |
| 8    | <i>Data sources/measurement</i> | For each variable of interest, give sources of data and details of methods of assessment (measurement). Describe comparability of assessment methods if there is more than one group                                                                                                                                                                              | 337-338    |
| 9    | <i>Bias</i>                     | Describe any efforts to address potential sources of bias                                                                                                                                                                                                                                                                                                         |            |
| 10   | <i>Study size</i>               | Explain how the study size was arrived at                                                                                                                                                                                                                                                                                                                         |            |
| 11   | <i>Quantitative variables</i>   | Explain how quantitative variables were handled in the analyses. If applicable, describe which groupings were chosen and why                                                                                                                                                                                                                                      |            |
| 12   | <i>Statistical methods</i>      | <p>(a) Describe all statistical methods, including those used to control for confounding</p> <p>(b) Describe any methods used to examine subgroups and interactions</p> <p>(c) Explain how missing data were addressed</p> <p>(d) If applicable, describe analytical methods taking account of sampling strategy</p> <p>(e) Describe any sensitivity analyses</p> | 338-339    |
|      | <b>Results</b>                  |                                                                                                                                                                                                                                                                                                                                                                   |            |
| 13   | <i>Participants</i>             | <p>(a) Report numbers of individuals at each stage of study—eg numbers potentially eligible, examined for eligibility, confirmed eligible, included in the study, completing follow-up, and analysed</p> <p>(b) Give reasons for non-participation at each stage</p>                                                                                              | 339        |

|                          |                  |                                                                                                                                                                                                                                                                                                                                                                                                               |         |
|--------------------------|------------------|---------------------------------------------------------------------------------------------------------------------------------------------------------------------------------------------------------------------------------------------------------------------------------------------------------------------------------------------------------------------------------------------------------------|---------|
|                          |                  | (c) Consider use of a flow diagram                                                                                                                                                                                                                                                                                                                                                                            |         |
| 14                       | Descriptive data | (a) Give characteristics of study participants (eg demographic, clinical, social) and information on exposures and potential confounders<br>(b) Indicate number of participants with missing data for each variable of interest                                                                                                                                                                               | 339-341 |
| 15                       | Outcome data     | Report numbers of outcome events or summary measures                                                                                                                                                                                                                                                                                                                                                          | 339-341 |
| 16                       | Main results     | (a) Give unadjusted estimates and, if applicable, confounder-adjusted estimates and their precision (eg, 95% confidence interval). Make clear which confounders were adjusted for and why they were included<br>(b) Report category boundaries when continuous variables were categorized<br>(c) If relevant, consider translating estimates of relative risk into absolute risk for a meaningful time period | 339-341 |
| 17                       | Other analyses   | Report other analyses done—eg analyses of subgroups and interactions, and sensitivity analyses                                                                                                                                                                                                                                                                                                                |         |
| <b>Discussion</b>        |                  |                                                                                                                                                                                                                                                                                                                                                                                                               |         |
| 18                       | Key results      | Summarise key results with reference to study objectives                                                                                                                                                                                                                                                                                                                                                      | 341     |
| 19                       | Limitations      | Discuss limitations of the study, taking into account sources of potential bias or imprecision. Discuss both direction and magnitude of any potential bias                                                                                                                                                                                                                                                    | 341     |
| 20                       | Interpretation   | Give a cautious overall interpretation of results considering objectives, limitations, multiplicity of analyses, results from similar studies, and other relevant evidence                                                                                                                                                                                                                                    | 342-343 |
| 21                       | Generalisability | Discuss the generalisability (external validity) of the study results                                                                                                                                                                                                                                                                                                                                         | 343     |
| <b>Other information</b> |                  |                                                                                                                                                                                                                                                                                                                                                                                                               |         |
| 22                       | Funding          | Give the source of funding and the role of the funders for the present study and, if applicable, for the original study on which the present article is based                                                                                                                                                                                                                                                 |         |
| TOT.                     |                  |                                                                                                                                                                                                                                                                                                                                                                                                               | 16      |

## STROBE CHECKLIST CROSS-SECTIONAL STUDIES - ARTICLE 10

TITLE: Impact of oral conditions on the quality of life in rural schoolchildren, Piura, Peru

Del Castillo-López et al. (2014)

| Item                | Recommendation                                                                                                                                                                                                             | Page n°        |
|---------------------|----------------------------------------------------------------------------------------------------------------------------------------------------------------------------------------------------------------------------|----------------|
| 1                   | <b>Title and Abstract</b><br>(a) Indicate the study's design with a commonly used term in the title or the abstract<br>(b) Provide in the abstract an informative and balanced summary of what was done and what was found | 220<br>220-221 |
| <b>Introduction</b> |                                                                                                                                                                                                                            |                |
| 2                   | <i>Background/Rationale</i><br>Explain the scientific background and rationale for the investigation being reported                                                                                                        | 221-222        |
| 3                   | <i>Objectives</i><br>State specific objectives, including any prespecified hypotheses                                                                                                                                      | 222            |
| <b>Methods</b>      |                                                                                                                                                                                                                            |                |
| 4                   | <i>Study design</i><br>Present key elements of study design early in the paper                                                                                                                                             | 222            |

|                          |                                      |                                                                                                                                                                                                                                                                                                                                                                                                               |         |
|--------------------------|--------------------------------------|---------------------------------------------------------------------------------------------------------------------------------------------------------------------------------------------------------------------------------------------------------------------------------------------------------------------------------------------------------------------------------------------------------------|---------|
| 5                        | <i>Setting</i>                       | Describe the setting, locations, and relevant dates, including periods of recruitment, exposure, follow-up, and data collection                                                                                                                                                                                                                                                                               | 222     |
| 6                        | <i>Participants</i>                  | (a) Give the eligibility criteria, and the sources and methods of selection of participants                                                                                                                                                                                                                                                                                                                   |         |
| 7                        | <i>Variables</i>                     | Clearly define all outcomes, exposures, predictors, potential confounders, and effect modifiers. Give diagnostic criteria, if applicable                                                                                                                                                                                                                                                                      | 222     |
| 8                        | <i>Data sources/<br/>measurement</i> | For each variable of interest, give sources of data and details of methods of assessment (measurement). Describe comparability of assessment methods if there is more than one group                                                                                                                                                                                                                          | 222     |
| 9                        | <i>Bias</i>                          | Describe any efforts to address potential sources of bias                                                                                                                                                                                                                                                                                                                                                     |         |
| 10                       | <i>Study size</i>                    | Explain how the study size was arrived at                                                                                                                                                                                                                                                                                                                                                                     | 222     |
| 11                       | <i>Quantitative variables</i>        | Explain how quantitative variables were handled in the analyses. If applicable, describe which groupings were chosen and why                                                                                                                                                                                                                                                                                  |         |
| 12                       | <i>Statistical methods</i>           | (a) Describe all statistical methods, including those used to control for confounding<br>(b) Describe any methods used to examine subgroups and interactions<br>(c) Explain how missing data were addressed<br>(d) If applicable, describe analytical methods taking account of sampling strategy<br>(e) Describe any sensitivity analyses                                                                    | 222-223 |
| <b>Results</b>           |                                      |                                                                                                                                                                                                                                                                                                                                                                                                               |         |
| 13                       | <i>Participants</i>                  | (a) Report numbers of individuals at each stage of study—eg numbers potentially eligible, examined for eligibility, confirmed eligible, included in the study, completing follow-up, and analysed<br>(b) Give reasons for non-participation at each stage<br>(c) Consider use of a flow diagram                                                                                                               | 223     |
| 14                       | <i>Descriptive data</i>              | (a) Give characteristics of study participants (eg demographic, clinical, social) and information on exposures and potential confounders<br>(b) Indicate number of participants with missing data for each variable of interest                                                                                                                                                                               | 223-225 |
| 15                       | <i>Outcome data</i>                  | Report numbers of outcome events or summary measures                                                                                                                                                                                                                                                                                                                                                          | 223-226 |
| 16                       | <i>Main results</i>                  | (a) Give unadjusted estimates and, if applicable, confounder-adjusted estimates and their precision (eg, 95% confidence interval). Make clear which confounders were adjusted for and why they were included<br>(b) Report category boundaries when continuous variables were categorized<br>(c) If relevant, consider translating estimates of relative risk into absolute risk for a meaningful time period | 223-226 |
| 17                       | <i>Other analyses</i>                | Report other analyses done—eg analyses of subgroups and interactions, and sensitivity analyses                                                                                                                                                                                                                                                                                                                |         |
| <b>Discussion</b>        |                                      |                                                                                                                                                                                                                                                                                                                                                                                                               |         |
| 18                       | <i>Key results</i>                   | Summarise key results with reference to study objectives                                                                                                                                                                                                                                                                                                                                                      | 226     |
| 19                       | <i>Limitations</i>                   | Discuss limitations of the study, taking into account sources of potential bias or imprecision. Discuss both direction and magnitude of any potential bias                                                                                                                                                                                                                                                    | 227     |
| 20                       | <i>Interpretation</i>                | Give a cautious overall interpretation of results considering objectives, limitations, multiplicity of analyses, results from similar studies, and other relevant evidence                                                                                                                                                                                                                                    | 226-227 |
| 21                       | <i>Generalisability</i>              | Discuss the generalisability (external validity) of the study results                                                                                                                                                                                                                                                                                                                                         | 227     |
| <b>Other information</b> |                                      |                                                                                                                                                                                                                                                                                                                                                                                                               |         |

|      |         |                                                                                                                                                               |
|------|---------|---------------------------------------------------------------------------------------------------------------------------------------------------------------|
| 22   | Funding | Give the source of funding and the role of the funders for the present study and, if applicable, for the original study on which the present article is based |
| TOT. |         | 17                                                                                                                                                            |

## STROBE CHECKLIST CROSS-SECTIONAL STUDIES - ARTICLE 11

TITLE: Oral Impacts on Daily Performances of Children 12 and 15-Year-Old in Can Tho City

Do et al. (2020)

| Item | Recommendation                  |                                                                                                                                                                                                                                                                                                                                                                   | Page<br>n° |
|------|---------------------------------|-------------------------------------------------------------------------------------------------------------------------------------------------------------------------------------------------------------------------------------------------------------------------------------------------------------------------------------------------------------------|------------|
| 1    | <b>Title and Abstract</b>       | <p>(a) Indicate the study's design with a commonly used term in the title or the abstract</p> <p>(b) Provide in the abstract an informative and balanced summary of what was done and what was found</p>                                                                                                                                                          | 585        |
|      | <b>Introduction</b>             |                                                                                                                                                                                                                                                                                                                                                                   |            |
| 2    | <i>Background/Rationale</i>     | Explain the scientific background and rationale for the investigation being reported                                                                                                                                                                                                                                                                              | 585        |
| 3    | <i>Objectives</i>               | State specific objectives, including any prespecified hypotheses                                                                                                                                                                                                                                                                                                  | 585        |
|      | <b>Methods</b>                  |                                                                                                                                                                                                                                                                                                                                                                   |            |
| 4    | <i>Study design</i>             | Present key elements of study design early in the paper                                                                                                                                                                                                                                                                                                           | 586        |
| 5    | <i>Setting</i>                  | Describe the setting, locations, and relevant dates, including periods of recruitment, exposure, follow-up, and data collection                                                                                                                                                                                                                                   | 586        |
| 6    | <i>Participants</i>             | (a) Give the eligibility criteria, and the sources and methods of selection of participants                                                                                                                                                                                                                                                                       | 586        |
| 7    | <i>Variables</i>                | Clearly define all outcomes, exposures, predictors, potential confounders, and effect modifiers. Give diagnostic criteria, if applicable                                                                                                                                                                                                                          | 586        |
| 8    | <i>Data sources/measurement</i> | For each variable of interest, give sources of data and details of methods of assessment (measurement). Describe comparability of assessment methods if there is more than one group                                                                                                                                                                              | 586        |
| 9    | <i>Bias</i>                     | Describe any efforts to address potential sources of bias                                                                                                                                                                                                                                                                                                         |            |
| 10   | <i>Study size</i>               | Explain how the study size was arrived at                                                                                                                                                                                                                                                                                                                         | 586        |
| 11   | <i>Quantitative variables</i>   | Explain how quantitative variables were handled in the analyses. If applicable, describe which groupings were chosen and why                                                                                                                                                                                                                                      |            |
| 12   | <i>Statistical methods</i>      | <p>(a) Describe all statistical methods, including those used to control for confounding</p> <p>(b) Describe any methods used to examine subgroups and interactions</p> <p>(c) Explain how missing data were addressed</p> <p>(d) If applicable, describe analytical methods taking account of sampling strategy</p> <p>(e) Describe any sensitivity analyses</p> | 586        |
|      | <b>Results</b>                  |                                                                                                                                                                                                                                                                                                                                                                   |            |
| 13   | <i>Participants</i>             | <p>(a) Report numbers of individuals at each stage of study—eg numbers potentially eligible, examined for eligibility, confirmed eligible, included in the study, completing follow-up, and analysed</p> <p>(b) Give reasons for non-participation at each stage</p> <p>(c) Consider use of a flow diagram</p>                                                    | 586        |

|                          |                         |                                                                                                                                                                                                                                                                                                                                                                                                               |         |
|--------------------------|-------------------------|---------------------------------------------------------------------------------------------------------------------------------------------------------------------------------------------------------------------------------------------------------------------------------------------------------------------------------------------------------------------------------------------------------------|---------|
| 14                       | <i>Descriptive data</i> | (a) Give characteristics of study participants (eg demographic, clinical, social) and information on exposures and potential confounders<br>(b) Indicate number of participants with missing data for each variable of interest                                                                                                                                                                               | 586-587 |
| 15                       | <i>Outcome data</i>     | Report numbers of outcome events or summary measures                                                                                                                                                                                                                                                                                                                                                          | 586-588 |
| 16                       | <i>Main results</i>     | (a) Give unadjusted estimates and, if applicable, confounder-adjusted estimates and their precision (eg, 95% confidence interval). Make clear which confounders were adjusted for and why they were included<br>(b) Report category boundaries when continuous variables were categorized<br>(c) If relevant, consider translating estimates of relative risk into absolute risk for a meaningful time period | 586-588 |
| 17                       | <i>Other analyses</i>   | Report other analyses done—eg analyses of subgroups and interactions, and sensitivity analyses                                                                                                                                                                                                                                                                                                                |         |
| <b>Discussion</b>        |                         |                                                                                                                                                                                                                                                                                                                                                                                                               |         |
| 18                       | <i>Key results</i>      | Summarise key results with reference to study objectives                                                                                                                                                                                                                                                                                                                                                      | 588     |
| 19                       | <i>Limitations</i>      | Discuss limitations of the study, taking into account sources of potential bias or imprecision. Discuss both direction and magnitude of any potential bias                                                                                                                                                                                                                                                    |         |
| 20                       | <i>Interpretation</i>   | Give a cautious overall interpretation of results considering objectives, limitations, multiplicity of analyses, results from similar studies, and other relevant evidence                                                                                                                                                                                                                                    | 588-589 |
| 21                       | <i>Generalisability</i> | Discuss the generalisability (external validity) of the study results                                                                                                                                                                                                                                                                                                                                         | 588-589 |
| <b>Other information</b> |                         |                                                                                                                                                                                                                                                                                                                                                                                                               |         |
| 22                       | <i>Funding</i>          | Give the source of funding and the role of the funders for the present study and, if applicable, for the original study on which the present article is based                                                                                                                                                                                                                                                 |         |
| <b>TOT.</b>              |                         |                                                                                                                                                                                                                                                                                                                                                                                                               | 17      |

## STROBE CHECKLIST CROSS-SECTIONAL STUDIES - ARTICLE 12

**TITLE:** Life quality related to oral health of schoolchildren from Bucharest

**Dumitrache et al. (2009)**

| Item                | Recommendation              |                                                                                                                                                                                               | Page n° |
|---------------------|-----------------------------|-----------------------------------------------------------------------------------------------------------------------------------------------------------------------------------------------|---------|
| 1                   | <b>Title and Abstract</b>   | (a) Indicate the study's design with a commonly used term in the title or the abstract<br>(b) Provide in the abstract an informative and balanced summary of what was done and what was found | 169     |
| <b>Introduction</b> |                             |                                                                                                                                                                                               |         |
| 2                   | <i>Background/Rationale</i> | Explain the scientific background and rationale for the investigation being reported                                                                                                          | 170-171 |
| 3                   | <i>Objectives</i>           | State specific objectives, including any prespecified hypotheses                                                                                                                              |         |
| <b>Methods</b>      |                             |                                                                                                                                                                                               |         |
| 4                   | <i>Study design</i>         | Present key elements of study design early in the paper                                                                                                                                       | 171     |

|                          |                              |                                                                                                                                                                                                                                                                                                                                                                                                               |         |
|--------------------------|------------------------------|---------------------------------------------------------------------------------------------------------------------------------------------------------------------------------------------------------------------------------------------------------------------------------------------------------------------------------------------------------------------------------------------------------------|---------|
| 5                        | Setting                      | Describe the setting, locations, and relevant dates, including periods of recruitment, exposure, follow-up, and data collection                                                                                                                                                                                                                                                                               | 171     |
| 6                        | Participants                 | (a) Give the eligibility criteria, and the sources and methods of selection of participants                                                                                                                                                                                                                                                                                                                   | 171     |
| 7                        | Variables                    | Clearly define all outcomes, exposures, predictors, potential confounders, and effect modifiers. Give diagnostic criteria, if applicable                                                                                                                                                                                                                                                                      | 171-172 |
| 8                        | Data sources/<br>measurement | For each variable of interest, give sources of data and details of methods of assessment (measurement). Describe comparability of assessment methods if there is more than one group                                                                                                                                                                                                                          | 171-172 |
| 9                        | Bias                         | Describe any efforts to address potential sources of bias                                                                                                                                                                                                                                                                                                                                                     |         |
| 10                       | Study size                   | Explain how the study size was arrived at                                                                                                                                                                                                                                                                                                                                                                     |         |
| 11                       | Quantitative variables       | Explain how quantitative variables were handled in the analyses. If applicable, describe which groupings were chosen and why                                                                                                                                                                                                                                                                                  |         |
| 12                       | Statistical methods          | (a) Describe all statistical methods, including those used to control for confounding<br>(b) Describe any methods used to examine subgroups and interactions<br>(c) Explain how missing data were addressed<br>(d) If applicable, describe analytical methods taking account of sampling strategy<br>(e) Describe any sensitivity analyses                                                                    | 172     |
| <b>Results</b>           |                              |                                                                                                                                                                                                                                                                                                                                                                                                               |         |
| 13                       | Participants                 | (a) Report numbers of individuals at each stage of study—eg numbers potentially eligible, examined for eligibility, confirmed eligible, included in the study, completing follow-up, and analysed<br>(b) Give reasons for non-participation at each stage<br>(c) Consider use of a flow diagram                                                                                                               | 173     |
| 14                       | Descriptive data             | (a) Give characteristics of study participants (eg demographic, clinical, social) and information on exposures and potential confounders<br>(b) Indicate number of participants with missing data for each variable of interest                                                                                                                                                                               | 173-175 |
| 15                       | Outcome data                 | Report numbers of outcome events or summary measures                                                                                                                                                                                                                                                                                                                                                          | 173-175 |
| 16                       | Main results                 | (a) Give unadjusted estimates and, if applicable, confounder-adjusted estimates and their precision (eg, 95% confidence interval). Make clear which confounders were adjusted for and why they were included<br>(b) Report category boundaries when continuous variables were categorized<br>(c) If relevant, consider translating estimates of relative risk into absolute risk for a meaningful time period | 173-175 |
| 17                       | Other analyses               | Report other analyses done—eg analyses of subgroups and interactions, and sensitivity analyses                                                                                                                                                                                                                                                                                                                |         |
| <b>Discussion</b>        |                              |                                                                                                                                                                                                                                                                                                                                                                                                               |         |
| 18                       | Key results                  | Summarise key results with reference to study objectives                                                                                                                                                                                                                                                                                                                                                      | 175     |
| 19                       | Limitations                  | Discuss limitations of the study, taking into account sources of potential bias or imprecision. Discuss both direction and magnitude of any potential bias                                                                                                                                                                                                                                                    |         |
| 20                       | Interpretation               | Give a cautious overall interpretation of results considering objectives, limitations, multiplicity of analyses, results from similar studies, and other relevant evidence                                                                                                                                                                                                                                    | 175-176 |
| 21                       | Generalisability             | Discuss the generalisability (external validity) of the study results                                                                                                                                                                                                                                                                                                                                         |         |
| <b>Other information</b> |                              |                                                                                                                                                                                                                                                                                                                                                                                                               |         |

|      |         |                                                                                                                                                               |
|------|---------|---------------------------------------------------------------------------------------------------------------------------------------------------------------|
| 22   | Funding | Give the source of funding and the role of the funders for the present study and, if applicable, for the original study on which the present article is based |
| TOT. |         | 14                                                                                                                                                            |

## STROBE CHECKLIST CROSS-SECTIONAL STUDIES - ARTICLE 13

**TITLE:** Oral health impact, dental caries experience, and associated factors in 12-15-year-old school children in India

### Kumar et al. (2015)

| Item | Recommendation                  |                                                                                                                                                                                                                                                                                                                                                                   | Page n° |
|------|---------------------------------|-------------------------------------------------------------------------------------------------------------------------------------------------------------------------------------------------------------------------------------------------------------------------------------------------------------------------------------------------------------------|---------|
| 1    | <b>Title and Abstract</b>       | <p>(a) Indicate the study's design with a commonly used term in the title or the abstract</p> <p>(b) Provide in the abstract an informative and balanced summary of what was done and what was found</p>                                                                                                                                                          | 1       |
|      | <b>Introduction</b>             |                                                                                                                                                                                                                                                                                                                                                                   |         |
| 2    | <i>Background/Rationale</i>     | Explain the scientific background and rationale for the investigation being reported                                                                                                                                                                                                                                                                              | 1-2     |
| 3    | <i>Objectives</i>               | State specific objectives, including any prespecified hypotheses                                                                                                                                                                                                                                                                                                  | 2       |
|      | <b>Methods</b>                  |                                                                                                                                                                                                                                                                                                                                                                   |         |
| 4    | <i>Study design</i>             | Present key elements of study design early in the paper                                                                                                                                                                                                                                                                                                           | 2       |
| 5    | <i>Setting</i>                  | Describe the setting, locations, and relevant dates, including periods of recruitment, exposure, follow-up, and data collection                                                                                                                                                                                                                                   | 2       |
| 6    | <i>Participants</i>             | (a) Give the eligibility criteria, and the sources and methods of selection of participants                                                                                                                                                                                                                                                                       | 2       |
| 7    | <i>Variables</i>                | Clearly define all outcomes, exposures, predictors, potential confounders, and effect modifiers. Give diagnostic criteria, if applicable                                                                                                                                                                                                                          | 2       |
| 8    | <i>Data sources/measurement</i> | For each variable of interest, give sources of data and details of methods of assessment (measurement). Describe comparability of assessment methods if there is more than one group                                                                                                                                                                              | 2       |
| 9    | <i>Bias</i>                     | Describe any efforts to address potential sources of bias                                                                                                                                                                                                                                                                                                         |         |
| 10   | <i>Study size</i>               | Explain how the study size was arrived at                                                                                                                                                                                                                                                                                                                         |         |
| 11   | <i>Quantitative variables</i>   | Explain how quantitative variables were handled in the analyses. If applicable, describe which groupings were chosen and why                                                                                                                                                                                                                                      |         |
| 12   | <i>Statistical methods</i>      | <p>(a) Describe all statistical methods, including those used to control for confounding</p> <p>(b) Describe any methods used to examine subgroups and interactions</p> <p>(c) Explain how missing data were addressed</p> <p>(d) If applicable, describe analytical methods taking account of sampling strategy</p> <p>(e) Describe any sensitivity analyses</p> | 2       |
|      | <b>Results</b>                  |                                                                                                                                                                                                                                                                                                                                                                   |         |
| 13   | <i>Participants</i>             | <p>(a) Report numbers of individuals at each stage of study—eg numbers potentially eligible, examined for eligibility, confirmed eligible, included in the study, completing follow-up, and analysed</p> <p>(b) Give reasons for non-participation at each stage</p>                                                                                              | 2       |



|                          |                  |                                                                                                                                                                                                                                                                                                                                                                                                               |           |
|--------------------------|------------------|---------------------------------------------------------------------------------------------------------------------------------------------------------------------------------------------------------------------------------------------------------------------------------------------------------------------------------------------------------------------------------------------------------------|-----------|
|                          |                  | (c) Consider use of a flow diagram                                                                                                                                                                                                                                                                                                                                                                            |           |
| 14                       | Descriptive data | (a) Give characteristics of study participants (eg demographic, clinical, social) and information on exposures and potential confounders<br>(b) Indicate number of participants with missing data for each variable of interest                                                                                                                                                                               | 2-4       |
| 15                       | Outcome data     | Report numbers of outcome events or summary measures                                                                                                                                                                                                                                                                                                                                                          | 2-4       |
| 16                       | Main results     | (a) Give unadjusted estimates and, if applicable, confounder-adjusted estimates and their precision (eg, 95% confidence interval). Make clear which confounders were adjusted for and why they were included<br>(b) Report category boundaries when continuous variables were categorized<br>(c) If relevant, consider translating estimates of relative risk into absolute risk for a meaningful time period | 2-4       |
| 17                       | Other analyses   | Report other analyses done—eg analyses of subgroups and interactions, and sensitivity analyses                                                                                                                                                                                                                                                                                                                |           |
| <b>Discussion</b>        |                  |                                                                                                                                                                                                                                                                                                                                                                                                               |           |
| 18                       | Key results      | Summarise key results with reference to study objectives                                                                                                                                                                                                                                                                                                                                                      | 3         |
| 19                       | Limitations      | Discuss limitations of the study, taking into account sources of potential bias or imprecision. Discuss both direction and magnitude of any potential bias                                                                                                                                                                                                                                                    | 5         |
| 20                       | Interpretation   | Give a cautious overall interpretation of results considering objectives, limitations, multiplicity of analyses, results from similar studies, and other relevant evidence                                                                                                                                                                                                                                    | 3-5       |
| 21                       | Generalisability | Discuss the generalisability (external validity) of the study results                                                                                                                                                                                                                                                                                                                                         | 5         |
| <b>Other information</b> |                  |                                                                                                                                                                                                                                                                                                                                                                                                               |           |
| 22                       | Funding          | Give the source of funding and the role of the funders for the present study and, if applicable, for the original study on which the present article is based                                                                                                                                                                                                                                                 |           |
| <b>TOT.</b>              |                  |                                                                                                                                                                                                                                                                                                                                                                                                               | <b>17</b> |

## STROBE CHECKLIST CROSS-SECTIONAL STUDIES - ARTICLE 14

**TITLE:** Oral Health Related Quality of Life in school children of urban-marginal area

**Marcelo-Ingunza et al. (2015)**

| Item                | Recommendation            |                                                                                                                                                                                               | Page n°        |
|---------------------|---------------------------|-----------------------------------------------------------------------------------------------------------------------------------------------------------------------------------------------|----------------|
| 1                   | <b>Title and Abstract</b> | (a) Indicate the study's design with a commonly used term in the title or the abstract<br>(b) Provide in the abstract an informative and balanced summary of what was done and what was found | 194<br>194-195 |
| <b>Introduction</b> |                           |                                                                                                                                                                                               |                |
| 2                   | Background/Rationale      | Explain the scientific background and rationale for the investigation being reported                                                                                                          | 195            |
| 3                   | Objectives                | State specific objectives, including any prespecified hypotheses                                                                                                                              | 195            |
| <b>Methods</b>      |                           |                                                                                                                                                                                               |                |
| 4                   | Study design              | Present key elements of study design early in the paper                                                                                                                                       | 195-196        |
| 5                   | Setting                   | Describe the setting, locations, and relevant dates, including periods of recruitment, exposure, follow-up, and data collection                                                               | 195-196        |

|                              |                              |                                                                                                                                                                                                                                                                                                                                                                                                               |                 |
|------------------------------|------------------------------|---------------------------------------------------------------------------------------------------------------------------------------------------------------------------------------------------------------------------------------------------------------------------------------------------------------------------------------------------------------------------------------------------------------|-----------------|
| 6                            | Participants                 | (a) Give the eligibility criteria, and the sources and methods of selection of participants                                                                                                                                                                                                                                                                                                                   | 195-196         |
| 7                            | Variables                    | Clearly define all outcomes, exposures, predictors, potential confounders, and effect modifiers. Give diagnostic criteria, if applicable                                                                                                                                                                                                                                                                      | 196             |
| 8                            | Data sources/<br>measurement | For each variable of interest, give sources of data and details of methods of assessment (measurement). Describe comparability of assessment methods if there is more than one group                                                                                                                                                                                                                          | 195-196         |
| 9                            | Bias                         | Describe any efforts to address potential sources of bias                                                                                                                                                                                                                                                                                                                                                     |                 |
| 10                           | Study size                   | Explain how the study size was arrived at                                                                                                                                                                                                                                                                                                                                                                     | 195-196         |
| 11                           | Quantitative<br>variables    | Explain how quantitative variables were handled in the analyses. If applicable, describe which groupings were chosen and why                                                                                                                                                                                                                                                                                  |                 |
| 12                           | Statistical<br>methods       | (a) Describe all statistical methods, including those used to control for confounding<br>(b) Describe any methods used to examine subgroups and interactions<br>(c) Explain how missing data were addressed<br>(d) If applicable, describe analytical methods taking account of sampling strategy<br>(e) Describe any sensitivity analyses                                                                    | 196             |
| <b>Results</b>               |                              |                                                                                                                                                                                                                                                                                                                                                                                                               |                 |
| 13                           | Participants                 | (a) Report numbers of individuals at each stage of study—eg numbers potentially eligible, examined for eligibility, confirmed eligible, included in the study, completing follow-up, and analysed<br>(b) Give reasons for non-participation at each stage<br>(c) Consider use of a flow diagram                                                                                                               |                 |
| 14                           | Descriptive data             | (a) Give characteristics of study participants (eg demographic, clinical, social) and information on exposures and potential confounders<br>(b) Indicate number of participants with missing data for each variable of interest                                                                                                                                                                               | 196-197         |
| 15                           | Outcome data                 | Report numbers of outcome events or summary measures                                                                                                                                                                                                                                                                                                                                                          | 196-197         |
| 16                           | Main results                 | (a) Give unadjusted estimates and, if applicable, confounder-adjusted estimates and their precision (eg, 95% confidence interval). Make clear which confounders were adjusted for and why they were included<br>(b) Report category boundaries when continuous variables were categorized<br>(c) If relevant, consider translating estimates of relative risk into absolute risk for a meaningful time period | 196-197         |
| 17                           | Other analyses               | Report other analyses done—eg analyses of subgroups and interactions, and sensitivity analyses                                                                                                                                                                                                                                                                                                                |                 |
| <b>Discussion</b>            |                              |                                                                                                                                                                                                                                                                                                                                                                                                               |                 |
| 18                           | Key results                  | Summarise key results with reference to study objectives                                                                                                                                                                                                                                                                                                                                                      | 197             |
| 19                           | Limitations                  | Discuss limitations of the study, taking into account sources of potential bias or imprecision. Discuss both direction and magnitude of any potential bias                                                                                                                                                                                                                                                    | 203             |
| 20                           | Interpretation               | Give a cautious overall interpretation of results considering objectives, limitations, multiplicity of analyses, results from similar studies, and other relevant evidence                                                                                                                                                                                                                                    | 197,<br>201-202 |
| 21                           | Generalisability             | Discuss the generalisability (external validity) of the study results                                                                                                                                                                                                                                                                                                                                         | 203             |
| <b>Other<br/>information</b> |                              |                                                                                                                                                                                                                                                                                                                                                                                                               |                 |
| 22                           | Funding                      | Give the source of funding and the role of the funders for the present study and, if applicable, for the original study on which the present article is based                                                                                                                                                                                                                                                 |                 |
| <b>TOT.</b>                  |                              |                                                                                                                                                                                                                                                                                                                                                                                                               | <b>17</b>       |

**STROBE CHECKLIST CROSS-SECTIONAL STUDIES - ARTICLE 15****TITLE:** Oral health impact on the quality of life of 11 to 14 years-old schoolchildren, Licantén, 2013**Moreno Ruiz et al. (2014)**

| Item      |                                 | Recommendation                                                                                                                                                                                                                                                                                                                                                    | Page n° |
|-----------|---------------------------------|-------------------------------------------------------------------------------------------------------------------------------------------------------------------------------------------------------------------------------------------------------------------------------------------------------------------------------------------------------------------|---------|
| <b>1</b>  | <b>Title and Abstract</b>       | <p>(a) Indicate the study's design with a commonly used term in the title or the abstract</p> <p>(b) Provide in the abstract an informative and balanced summary of what was done and what was found</p>                                                                                                                                                          | 142-143 |
|           | <b>Introduction</b>             |                                                                                                                                                                                                                                                                                                                                                                   |         |
| <b>2</b>  | <i>Background/Rationale</i>     | Explain the scientific background and rationale for the investigation being reported                                                                                                                                                                                                                                                                              | 143     |
| <b>3</b>  | <i>Objectives</i>               | State specific objectives, including any prespecified hypotheses                                                                                                                                                                                                                                                                                                  | 143     |
|           | <b>Methods</b>                  |                                                                                                                                                                                                                                                                                                                                                                   |         |
| <b>4</b>  | <i>Study design</i>             | Present key elements of study design early in the paper                                                                                                                                                                                                                                                                                                           |         |
| <b>5</b>  | <i>Setting</i>                  | Describe the setting, locations, and relevant dates, including periods of recruitment, exposure, follow-up, and data collection                                                                                                                                                                                                                                   | 144     |
| <b>6</b>  | <i>Participants</i>             | (a) Give the eligibility criteria, and the sources and methods of selection of participants                                                                                                                                                                                                                                                                       | 144     |
| <b>7</b>  | <i>Variables</i>                | Clearly define all outcomes, exposures, predictors, potential confounders, and effect modifiers. Give diagnostic criteria, if applicable                                                                                                                                                                                                                          | 144     |
| <b>8</b>  | <i>Data sources/measurement</i> | For each variable of interest, give sources of data and details of methods of assessment (measurement). Describe comparability of assessment methods if there is more than one group                                                                                                                                                                              | 144     |
| <b>9</b>  | <i>Bias</i>                     | Describe any efforts to address potential sources of bias                                                                                                                                                                                                                                                                                                         |         |
| <b>10</b> | <i>Study size</i>               | Explain how the study size was arrived at                                                                                                                                                                                                                                                                                                                         |         |
| <b>11</b> | <i>Quantitative variables</i>   | Explain how quantitative variables were handled in the analyses. If applicable, describe which groupings were chosen and why                                                                                                                                                                                                                                      |         |
| <b>12</b> | <i>Statistical methods</i>      | <p>(a) Describe all statistical methods, including those used to control for confounding</p> <p>(b) Describe any methods used to examine subgroups and interactions</p> <p>(c) Explain how missing data were addressed</p> <p>(d) If applicable, describe analytical methods taking account of sampling strategy</p> <p>(e) Describe any sensitivity analyses</p> | 144     |
|           | <b>Results</b>                  |                                                                                                                                                                                                                                                                                                                                                                   |         |
| <b>13</b> | <i>Participants</i>             | <p>(a) Report numbers of individuals at each stage of study—eg numbers potentially eligible, examined for eligibility, confirmed eligible, included in the study, completing follow-up, and analysed</p> <p>(b) Give reasons for non-participation at each stage</p> <p>(c) Consider use of a flow diagram</p>                                                    | 144     |
| <b>14</b> | <i>Descriptive data</i>         | <p>(a) Give characteristics of study participants (eg demographic, clinical, social) and information on exposures and potential confounders</p> <p>(b) Indicate number of participants with missing data for each variable of interest</p>                                                                                                                        | 144-147 |
| <b>15</b> | <i>Outcome data</i>             | Report numbers of outcome events or summary measures                                                                                                                                                                                                                                                                                                              | 144-147 |

|                          |                  |                                                                                                                                                                                                                                                                                                                                                                                                               |         |
|--------------------------|------------------|---------------------------------------------------------------------------------------------------------------------------------------------------------------------------------------------------------------------------------------------------------------------------------------------------------------------------------------------------------------------------------------------------------------|---------|
| 16                       | Main results     | (a) Give unadjusted estimates and, if applicable, confounder-adjusted estimates and their precision (eg, 95% confidence interval). Make clear which confounders were adjusted for and why they were included<br>(b) Report category boundaries when continuous variables were categorized<br>(c) If relevant, consider translating estimates of relative risk into absolute risk for a meaningful time period | 144-147 |
| 17                       | Other analyses   | Report other analyses done—eg analyses of subgroups and interactions, and sensitivity analyses                                                                                                                                                                                                                                                                                                                |         |
| <b>Discussion</b>        |                  |                                                                                                                                                                                                                                                                                                                                                                                                               |         |
| 18                       | Key results      | Summarise key results with reference to study objectives                                                                                                                                                                                                                                                                                                                                                      | 145-146 |
| 19                       | Limitations      | Discuss limitations of the study, taking into account sources of potential bias or imprecision. Discuss both direction and magnitude of any potential bias                                                                                                                                                                                                                                                    |         |
| 20                       | Interpretation   | Give a cautious overall interpretation of results considering objectives, limitations, multiplicity of analyses, results from similar studies, and other relevant evidence                                                                                                                                                                                                                                    | 146-147 |
| 21                       | Generalisability | Discuss the generalisability (external validity) of the study results                                                                                                                                                                                                                                                                                                                                         | 147     |
| <b>Other information</b> |                  |                                                                                                                                                                                                                                                                                                                                                                                                               |         |
| 22                       | Funding          | Give the source of funding and the role of the funders for the present study and, if applicable, for the original study on which the present article is based                                                                                                                                                                                                                                                 |         |
| TOT.                     |                  |                                                                                                                                                                                                                                                                                                                                                                                                               | 15      |

## STROBE CHECKLIST CROSS-SECTIONAL STUDIES - ARTICLE 16

**TITLE:** The relation between oral impacts on daily performances and perceived clinical oral conditions in primary school children in the Ugu District, Kwazulu Natal, South Africa.

### Naidoo et al. (2013)

| Item                | Recommendation              |                                                                                                                                                                                               | Page n° |
|---------------------|-----------------------------|-----------------------------------------------------------------------------------------------------------------------------------------------------------------------------------------------|---------|
| 1                   | <b>Title and Abstract</b>   | (a) Indicate the study's design with a commonly used term in the title or the abstract<br>(b) Provide in the abstract an informative and balanced summary of what was done and what was found | 214     |
| <b>Introduction</b> |                             |                                                                                                                                                                                               |         |
| 2                   | <i>Background/Rationale</i> | Explain the scientific background and rationale for the investigation being reported                                                                                                          | 214-215 |
| 3                   | <i>Objectives</i>           | State specific objectives, including any prespecified hypotheses                                                                                                                              | 215     |
| <b>Methods</b>      |                             |                                                                                                                                                                                               |         |
| 4                   | <i>Study design</i>         | Present key elements of study design early in the paper                                                                                                                                       | 215     |
| 5                   | <i>Setting</i>              | Describe the setting, locations, and relevant dates, including periods of recruitment, exposure, follow-up, and data collection                                                               | 215     |
| 6                   | <i>Participants</i>         | (a) Give the eligibility criteria, and the sources and methods of selection of participants                                                                                                   | 215     |
| 7                   | <i>Variables</i>            | Clearly define all outcomes, exposures, predictors, potential confounders, and effect modifiers. Give diagnostic criteria, if applicable                                                      | 215     |

|                          |                              |                                                                                                                                                                                                                                                                                                                                                                                                               |         |
|--------------------------|------------------------------|---------------------------------------------------------------------------------------------------------------------------------------------------------------------------------------------------------------------------------------------------------------------------------------------------------------------------------------------------------------------------------------------------------------|---------|
| 8                        | Data sources/<br>measurement | For each variable of interest, give sources of data and details of methods of assessment (measurement).<br>Describe comparability of assessment methods if there is more than one group                                                                                                                                                                                                                       | 215     |
| 9                        | Bias                         | Describe any efforts to address potential sources of bias                                                                                                                                                                                                                                                                                                                                                     |         |
| 10                       | Study size                   | Explain how the study size was arrived at                                                                                                                                                                                                                                                                                                                                                                     |         |
| 11                       | Quantitative<br>variables    | Explain how quantitative variables were handled in the analyses. If applicable, describe which groupings were chosen and why                                                                                                                                                                                                                                                                                  |         |
| 12                       | Statistical<br>methods       | (a) Describe all statistical methods, including those used to control for confounding<br>(b) Describe any methods used to examine subgroups and interactions<br>(c) Explain how missing data were addressed<br>(d) If applicable, describe analytical methods taking account of sampling strategy<br>(e) Describe any sensitivity analyses                                                                    | 215     |
| <b>Results</b>           |                              |                                                                                                                                                                                                                                                                                                                                                                                                               |         |
| 13                       | Participants                 | (a) Report numbers of individuals at each stage of study—eg numbers potentially eligible, examined for eligibility, confirmed eligible, included in the study, completing follow-up, and analysed<br>(b) Give reasons for non-participation at each stage<br>(c) Consider use of a flow diagram                                                                                                               | 215     |
| 14                       | Descriptive data             | (a) Give characteristics of study participants (eg demographic, clinical, social) and information on exposures and potential confounders<br>(b) Indicate number of participants with missing data for each variable of interest                                                                                                                                                                               | 215-217 |
| 15                       | Outcome data                 | Report numbers of outcome events or summary measures                                                                                                                                                                                                                                                                                                                                                          | 215-217 |
| 16                       | Main results                 | (a) Give unadjusted estimates and, if applicable, confounder-adjusted estimates and their precision (eg, 95% confidence interval). Make clear which confounders were adjusted for and why they were included<br>(b) Report category boundaries when continuous variables were categorized<br>(c) If relevant, consider translating estimates of relative risk into absolute risk for a meaningful time period | 215-217 |
| 17                       | Other analyses               | Report other analyses done—eg analyses of subgroups and interactions, and sensitivity analyses                                                                                                                                                                                                                                                                                                                |         |
| <b>Discussion</b>        |                              |                                                                                                                                                                                                                                                                                                                                                                                                               |         |
| 18                       | Key results                  | Summarise key results with reference to study objectives                                                                                                                                                                                                                                                                                                                                                      | 216-217 |
| 19                       | Limitations                  | Discuss limitations of the study, taking into account sources of potential bias or imprecision. Discuss both direction and magnitude of any potential bias                                                                                                                                                                                                                                                    | 217     |
| 20                       | Interpretation               | Give a cautious overall interpretation of results considering objectives, limitations, multiplicity of analyses, results from similar studies, and other relevant evidence                                                                                                                                                                                                                                    | 216-217 |
| 21                       | Generalisability             | Discuss the generalisability (external validity) of the study results                                                                                                                                                                                                                                                                                                                                         | 217     |
| <b>Other information</b> |                              |                                                                                                                                                                                                                                                                                                                                                                                                               |         |
| 22                       | Funding                      | Give the source of funding and the role of the funders for the present study and, if applicable, for the original study on which the present article is based                                                                                                                                                                                                                                                 | 217     |
| TOT.                     |                              |                                                                                                                                                                                                                                                                                                                                                                                                               | 18      |

**STROBE CHECKLIST CROSS-SECTIONAL STUDIES - ARTICLE 17**

TITLE: Oral health-related quality of life among 11-12year old indigenous children in Malaysia

## Nordin et al. (2019)

| Item |                                 | Recommendation                                                                                                                                                                                    | Page<br>n° |
|------|---------------------------------|---------------------------------------------------------------------------------------------------------------------------------------------------------------------------------------------------|------------|
| 1    | <b>Title and Abstract</b>       | (a) Indicate the study's design with a commonly used term in the title or the abstract                                                                                                            | 1          |
|      |                                 | (b) Provide in the abstract an informative and balanced summary of what was done and what was found                                                                                               | 1          |
|      | <b>Introduction</b>             |                                                                                                                                                                                                   |            |
| 2    | <i>Background/Rationale</i>     | Explain the scientific background and rationale for the investigation being reported                                                                                                              | 2          |
| 3    | <i>Objectives</i>               | State specific objectives, including any prespecified hypotheses                                                                                                                                  | 2          |
|      | <b>Methods</b>                  |                                                                                                                                                                                                   |            |
| 4    | <i>Study design</i>             | Present key elements of study design early in the paper                                                                                                                                           | 2          |
| 5    | <i>Setting</i>                  | Describe the setting, locations, and relevant dates, including periods of recruitment, exposure, follow-up, and data collection                                                                   | 2          |
| 6    | <i>Participants</i>             | (a) Give the eligibility criteria, and the sources and methods of selection of participants                                                                                                       | 2          |
| 7    | <i>Variables</i>                | Clearly define all outcomes, exposures, predictors, potential confounders, and effect modifiers. Give diagnostic criteria, if applicable                                                          | 2-3        |
| 8    | <i>Data sources/measurement</i> | For each variable of interest, give sources of data and details of methods of assessment (measurement). Describe comparability of assessment methods if there is more than one group              |            |
| 9    | <i>Bias</i>                     | Describe any efforts to address potential sources of bias                                                                                                                                         |            |
| 10   | <i>Study size</i>               | Explain how the study size was arrived at                                                                                                                                                         | 2          |
| 11   | <i>Quantitative variables</i>   | Explain how quantitative variables were handled in the analyses. If applicable, describe which groupings were chosen and why                                                                      |            |
| 12   | <i>Statistical methods</i>      | (a) Describe all statistical methods, including those used to control for confounding                                                                                                             | 3-4        |
|      |                                 | (b) Describe any methods used to examine subgroups and interactions                                                                                                                               |            |
|      |                                 | (c) Explain how missing data were addressed                                                                                                                                                       |            |
|      |                                 | (d) If applicable, describe analytical methods taking account of sampling strategy                                                                                                                |            |
|      |                                 | (e) Describe any sensitivity analyses                                                                                                                                                             |            |
|      | <b>Results</b>                  |                                                                                                                                                                                                   |            |
| 13   | <i>Participants</i>             | (a) Report numbers of individuals at each stage of study—eg numbers potentially eligible, examined for eligibility, confirmed eligible, included in the study, completing follow-up, and analysed | 4          |
|      |                                 | (b) Give reasons for non-participation at each stage                                                                                                                                              | 4          |
|      |                                 | (c) Consider use of a flow diagram                                                                                                                                                                |            |
| 14   | <i>Descriptive data</i>         | (a) Give characteristics of study participants (eg demographic, clinical, social) and information on exposures and potential confounders                                                          | 4-7        |
|      |                                 | (b) Indicate number of participants with missing data for each variable of interest                                                                                                               |            |
| 15   | <i>Outcome data</i>             | Report numbers of outcome events or summary measures                                                                                                                                              | 4-7        |

|                          |                  |                                                                                                                                                                                                                                                                                                                                                                                                               |     |
|--------------------------|------------------|---------------------------------------------------------------------------------------------------------------------------------------------------------------------------------------------------------------------------------------------------------------------------------------------------------------------------------------------------------------------------------------------------------------|-----|
| 16                       | Main results     | (a) Give unadjusted estimates and, if applicable, confounder-adjusted estimates and their precision (eg, 95% confidence interval). Make clear which confounders were adjusted for and why they were included<br>(b) Report category boundaries when continuous variables were categorized<br>(c) If relevant, consider translating estimates of relative risk into absolute risk for a meaningful time period |     |
| 17                       | Other analyses   | Report other analyses done—eg analyses of subgroups and interactions, and sensitivity analyses                                                                                                                                                                                                                                                                                                                |     |
| <b>Discussion</b>        |                  |                                                                                                                                                                                                                                                                                                                                                                                                               |     |
| 18                       | Key results      | Summarise key results with reference to study objectives                                                                                                                                                                                                                                                                                                                                                      | 6   |
| 19                       | Limitations      | Discuss limitations of the study, taking into account sources of potential bias or imprecision. Discuss both direction and magnitude of any potential bias                                                                                                                                                                                                                                                    | 8   |
| 20                       | Interpretation   | Give a cautious overall interpretation of results considering objectives, limitations, multiplicity of analyses, results from similar studies, and other relevant evidence                                                                                                                                                                                                                                    | 6-8 |
| 21                       | Generalisability | Discuss the generalisability (external validity) of the study results                                                                                                                                                                                                                                                                                                                                         | 8   |
| <b>Other information</b> |                  |                                                                                                                                                                                                                                                                                                                                                                                                               |     |
| 22                       | Funding          | Give the source of funding and the role of the funders for the present study and, if applicable, for the original study on which the present article is based                                                                                                                                                                                                                                                 | 9   |
| TOT.                     |                  |                                                                                                                                                                                                                                                                                                                                                                                                               | 17  |

## STROBE CHECKLIST CROSS-SECTIONAL STUDIES - ARTICLE 18

TITLE: Impact of oral conditions on the quality of life in schoolchildren in San Juan de Miraflores. Lima, Perú1

### Paredes Martínez et al. (2014)

| Item                | Recommendation                                                                                                                                                                                                             | Page n°        |
|---------------------|----------------------------------------------------------------------------------------------------------------------------------------------------------------------------------------------------------------------------|----------------|
| 1                   | <b>Title and Abstract</b><br>(a) Indicate the study's design with a commonly used term in the title or the abstract<br>(b) Provide in the abstract an informative and balanced summary of what was done and what was found | 171<br>171-172 |
| <b>Introduction</b> |                                                                                                                                                                                                                            |                |
| 2                   | <i>Background/Rationale</i><br>Explain the scientific background and rationale for the investigation being reported                                                                                                        | 172            |
| 3                   | <i>Objectives</i><br>State specific objectives, including any prespecified hypotheses                                                                                                                                      | 172            |
| <b>Methods</b>      |                                                                                                                                                                                                                            |                |
| 4                   | <i>Study design</i><br>Present key elements of study design early in the paper                                                                                                                                             | 172            |
| 5                   | <i>Setting</i><br>Describe the setting, locations, and relevant dates, including periods of recruitment, exposure, follow-up, and data collection                                                                          | 172            |
| 6                   | <i>Participants</i><br>(a) Give the eligibility criteria, and the sources and methods of selection of participants                                                                                                         | 172            |
| 7                   | <i>Variables</i><br>Clearly define all outcomes, exposures, predictors, potential confounders, and effect modifiers. Give diagnostic criteria, if applicable                                                               | 172-173        |

|                          |                              |                                                                                                                                                                                                                                                                                                                                                                                                               |         |
|--------------------------|------------------------------|---------------------------------------------------------------------------------------------------------------------------------------------------------------------------------------------------------------------------------------------------------------------------------------------------------------------------------------------------------------------------------------------------------------|---------|
| 8                        | Data sources/<br>measurement | For each variable of interest, give sources of data and details of methods of assessment (measurement).<br>Describe comparability of assessment methods if there is more than one group                                                                                                                                                                                                                       | 172-173 |
| 9                        | Bias                         | Describe any efforts to address potential sources of bias                                                                                                                                                                                                                                                                                                                                                     |         |
| 10                       | Study size                   | Explain how the study size was arrived at                                                                                                                                                                                                                                                                                                                                                                     | 172     |
| 11                       | Quantitative<br>variables    | Explain how quantitative variables were handled in the analyses. If applicable, describe which groupings were chosen and why                                                                                                                                                                                                                                                                                  |         |
| 12                       | Statistical<br>methods       | (a) Describe all statistical methods, including those used to control for confounding<br>(b) Describe any methods used to examine subgroups and interactions<br>(c) Explain how missing data were addressed<br>(d) If applicable, describe analytical methods taking account of sampling strategy<br>(e) Describe any sensitivity analyses                                                                    | 173     |
| <b>Results</b>           |                              |                                                                                                                                                                                                                                                                                                                                                                                                               |         |
| 13                       | Participants                 | (a) Report numbers of individuals at each stage of study—eg numbers potentially eligible, examined for eligibility, confirmed eligible, included in the study, completing follow-up, and analysed<br>(b) Give reasons for non-participation at each stage<br>(c) Consider use of a flow diagram                                                                                                               | 173     |
| 14                       | Descriptive data             | (a) Give characteristics of study participants (eg demographic, clinical, social) and information on exposures and potential confounders<br>(b) Indicate number of participants with missing data for each variable of interest                                                                                                                                                                               | 173-175 |
| 15                       | Outcome data                 | Report numbers of outcome events or summary measures                                                                                                                                                                                                                                                                                                                                                          | 173-175 |
| 16                       | Main results                 | (a) Give unadjusted estimates and, if applicable, confounder-adjusted estimates and their precision (eg, 95% confidence interval). Make clear which confounders were adjusted for and why they were included<br>(b) Report category boundaries when continuous variables were categorized<br>(c) If relevant, consider translating estimates of relative risk into absolute risk for a meaningful time period |         |
| 17                       | Other analyses               | Report other analyses done—eg analyses of subgroups and interactions, and sensitivity analyses                                                                                                                                                                                                                                                                                                                |         |
| <b>Discussion</b>        |                              |                                                                                                                                                                                                                                                                                                                                                                                                               |         |
| 18                       | Key results                  | Summarise key results with reference to study objectives                                                                                                                                                                                                                                                                                                                                                      | 175     |
| 19                       | Limitations                  | Discuss limitations of the study, taking into account sources of potential bias or imprecision. Discuss both direction and magnitude of any potential bias                                                                                                                                                                                                                                                    |         |
| 20                       | Interpretation               | Give a cautious overall interpretation of results considering objectives, limitations, multiplicity of analyses, results from similar studies, and other relevant evidence                                                                                                                                                                                                                                    | 175-176 |
| 21                       | Generalisability             | Discuss the generalisability (external validity) of the study results                                                                                                                                                                                                                                                                                                                                         | 176     |
| <b>Other information</b> |                              |                                                                                                                                                                                                                                                                                                                                                                                                               |         |
| 22                       | Funding                      | Give the source of funding and the role of the funders for the present study and, if applicable, for the original study on which the present article is based                                                                                                                                                                                                                                                 |         |
| TOT.                     |                              |                                                                                                                                                                                                                                                                                                                                                                                                               | 16      |



**TITLE:** Impact of oral diseases on daily activities among 12- To 15-year-old institutionalized orphan and non-orphan children in Bengaluru city: A cross-sectional analytical study

### Pavithran et al.(2020)

| Item    | Recommendation           |                                                                                                                                                                                                   | Page<br>n° |
|---------|--------------------------|---------------------------------------------------------------------------------------------------------------------------------------------------------------------------------------------------|------------|
| 1       | Title and Abstract       | (a) Indicate the study’s design with a commonly used term in the title or the abstract                                                                                                            | 396        |
|         |                          | (b) Provide in the abstract an informative and balanced summary of what was done and what was found                                                                                               | 396        |
|         |                          | Introduction                                                                                                                                                                                      |            |
| 2       | Background/Rationale     | Explain the scientific background and rationale for the investigation being reported                                                                                                              | 396-397    |
| 3       | Objectives               | State specific objectives, including any prespecified hypotheses                                                                                                                                  | 397        |
| Methods |                          |                                                                                                                                                                                                   |            |
| 4       | Study design             | Present key elements of study design early in the paper                                                                                                                                           | 397        |
| 5       | Setting                  | Describe the setting, locations, and relevant dates, including periods of recruitment, exposure, follow-up, and data collection                                                                   | 397        |
| 6       | Participants             | (a) Give the eligibility criteria, and the sources and methods of selection of participants                                                                                                       | 397        |
| 7       | Variables                | Clearly define all outcomes, exposures, predictors, potential confounders, and effect modifiers. Give diagnostic criteria, if applicable                                                          | 397-398    |
| 8       | Data sources/measurement | For each variable of interest, give sources of data and details of methods of assessment (measurement). Describe comparability of assessment methods if there is more than one group              | 397-398    |
| 9       | Bias                     | Describe any efforts to address potential sources of bias                                                                                                                                         |            |
| 10      | Study size               | Explain how the study size was arrived at                                                                                                                                                         |            |
| 11      | Quantitative variables   | Explain how quantitative variables were handled in the analyses. If applicable, describe which groupings were chosen and why                                                                      |            |
| 12      | Statistical methods      | (a) Describe all statistical methods, including those used to control for confounding                                                                                                             | 398        |
|         |                          | (b) Describe any methods used to examine subgroups and interactions                                                                                                                               |            |
|         |                          | (c) Explain how missing data were addressed                                                                                                                                                       |            |
|         |                          | (d) If applicable, describe analytical methods taking account of sampling strategy                                                                                                                |            |
|         |                          | (e) Describe any sensitivity analyses                                                                                                                                                             |            |
| Results |                          |                                                                                                                                                                                                   |            |
| 13      | Participants             | (a) Report numbers of individuals at each stage of study—eg numbers potentially eligible, examined for eligibility, confirmed eligible, included in the study, completing follow-up, and analysed | 398        |
|         |                          | (b) Give reasons for non-participation at each stage                                                                                                                                              |            |
|         |                          | (c) Consider use of a flow diagram                                                                                                                                                                |            |
| 14      | Descriptive data         | (a) Give characteristics of study participants (eg demographic, clinical, social) and information on exposures and potential confounders                                                          | 398-400    |
|         |                          | (b) Indicate number of participants with missing data for each variable of interest                                                                                                               |            |
| 15      | Outcome data             | Report numbers of outcome events or summary measures                                                                                                                                              | 398-400    |

|                          |                  |                                                                                                                                                                                                                                                                                                                                                                                                               |         |
|--------------------------|------------------|---------------------------------------------------------------------------------------------------------------------------------------------------------------------------------------------------------------------------------------------------------------------------------------------------------------------------------------------------------------------------------------------------------------|---------|
| 16                       | Main results     | (a) Give unadjusted estimates and, if applicable, confounder-adjusted estimates and their precision (eg, 95% confidence interval). Make clear which confounders were adjusted for and why they were included<br>(b) Report category boundaries when continuous variables were categorized<br>(c) If relevant, consider translating estimates of relative risk into absolute risk for a meaningful time period | 398-400 |
| 17                       | Other analyses   | Report other analyses done—eg analyses of subgroups and interactions, and sensitivity analyses                                                                                                                                                                                                                                                                                                                |         |
| <b>Discussion</b>        |                  |                                                                                                                                                                                                                                                                                                                                                                                                               |         |
| 18                       | Key results      | Summarise key results with reference to study objectives                                                                                                                                                                                                                                                                                                                                                      | 399     |
| 19                       | Limitations      | Discuss limitations of the study, taking into account sources of potential bias or imprecision. Discuss both direction and magnitude of any potential bias                                                                                                                                                                                                                                                    | 400-401 |
| 20                       | Interpretation   | Give a cautious overall interpretation of results considering objectives, limitations, multiplicity of analyses, results from similar studies, and other relevant evidence                                                                                                                                                                                                                                    | 399-400 |
| 21                       | Generalisability | Discuss the generalisability (external validity) of the study results                                                                                                                                                                                                                                                                                                                                         | 401     |
| <b>Other information</b> |                  |                                                                                                                                                                                                                                                                                                                                                                                                               |         |
| 22                       | Funding          | Give the source of funding and the role of the funders for the present study and, if applicable, for the original study on which the present article is based                                                                                                                                                                                                                                                 | 401     |
| TOT.                     |                  |                                                                                                                                                                                                                                                                                                                                                                                                               | 18      |

## STROBE CHECKLIST CROSS-SECTIONAL STUDIES - ARTICLE 20

TITLE: Quality of life related to the oral health in school from Sayausí, Cuenca Ecuador

### Reinoso Vintimilla et al. (2017)

| Item                | Recommendation       |                                                                                                                                                                                               | Page n° |
|---------------------|----------------------|-----------------------------------------------------------------------------------------------------------------------------------------------------------------------------------------------|---------|
| 1                   | Title and Abstract   | (a) Indicate the study's design with a commonly used term in the title or the abstract<br>(b) Provide in the abstract an informative and balanced summary of what was done and what was found | 227     |
| <b>Introduction</b> |                      |                                                                                                                                                                                               |         |
| 2                   | Background/Rationale | Explain the scientific background and rationale for the investigation being reported                                                                                                          | 228     |
| 3                   | Objectives           | State specific objectives, including any prespecified hypotheses                                                                                                                              | 228-229 |
| <b>Methods</b>      |                      |                                                                                                                                                                                               |         |
| 4                   | Study design         | Present key elements of study design early in the paper                                                                                                                                       | 229     |
| 5                   | Setting              | Describe the setting, locations, and relevant dates, including periods of recruitment, exposure, follow-up, and data collection                                                               | 229     |
| 6                   | Participants         | (a) Give the eligibility criteria, and the sources and methods of selection of participants                                                                                                   | 229     |
| 7                   | Variables            | Clearly define all outcomes, exposures, predictors, potential confounders, and effect modifiers. Give diagnostic criteria, if applicable                                                      | 229     |

|                          |                              |                                                                                                                                                                                                                                                                                                                                                                                                               |         |
|--------------------------|------------------------------|---------------------------------------------------------------------------------------------------------------------------------------------------------------------------------------------------------------------------------------------------------------------------------------------------------------------------------------------------------------------------------------------------------------|---------|
| 8                        | Data sources/<br>measurement | For each variable of interest, give sources of data and details of methods of assessment (measurement).<br>Describe comparability of assessment methods if there is more than one group                                                                                                                                                                                                                       | 229     |
| 9                        | Bias                         | Describe any efforts to address potential sources of bias                                                                                                                                                                                                                                                                                                                                                     |         |
| 10                       | Study size                   | Explain how the study size was arrived at                                                                                                                                                                                                                                                                                                                                                                     | 229     |
| 11                       | Quantitative<br>variables    | Explain how quantitative variables were handled in the analyses. If applicable, describe which groupings were chosen and why                                                                                                                                                                                                                                                                                  |         |
| 12                       | Statistical<br>methods       | (a) Describe all statistical methods, including those used to control for confounding<br>(b) Describe any methods used to examine subgroups and interactions<br>(c) Explain how missing data were addressed<br>(d) If applicable, describe analytical methods taking account of sampling strategy<br>(e) Describe any sensitivity analyses                                                                    | 229     |
| <b>Results</b>           |                              |                                                                                                                                                                                                                                                                                                                                                                                                               |         |
| 13                       | Participants                 | (a) Report numbers of individuals at each stage of study—eg numbers potentially eligible, examined for eligibility, confirmed eligible, included in the study, completing follow-up, and analysed<br>(b) Give reasons for non-participation at each stage<br>(c) Consider use of a flow diagram                                                                                                               |         |
| 14                       | Descriptive data             | (a) Give characteristics of study participants (eg demographic, clinical, social) and information on exposures and potential confounders<br>(b) Indicate number of participants with missing data for each variable of interest                                                                                                                                                                               | 229-232 |
| 15                       | Outcome data                 | Report numbers of outcome events or summary measures                                                                                                                                                                                                                                                                                                                                                          | 229-232 |
| 16                       | Main results                 | (a) Give unadjusted estimates and, if applicable, confounder-adjusted estimates and their precision (eg, 95% confidence interval). Make clear which confounders were adjusted for and why they were included<br>(b) Report category boundaries when continuous variables were categorized<br>(c) If relevant, consider translating estimates of relative risk into absolute risk for a meaningful time period | 229-232 |
| 17                       | Other analyses               | Report other analyses done—eg analyses of subgroups and interactions, and sensitivity analyses                                                                                                                                                                                                                                                                                                                |         |
| <b>Discussion</b>        |                              |                                                                                                                                                                                                                                                                                                                                                                                                               |         |
| 18                       | Key results                  | Summarise key results with reference to study objectives                                                                                                                                                                                                                                                                                                                                                      | 232     |
| 19                       | Limitations                  | Discuss limitations of the study, taking into account sources of potential bias or imprecision. Discuss both direction and magnitude of any potential bias                                                                                                                                                                                                                                                    |         |
| 20                       | Interpretation               | Give a cautious overall interpretation of results considering objectives, limitations, multiplicity of analyses, results from similar studies, and other relevant evidence                                                                                                                                                                                                                                    | 232-233 |
| 21                       | Generalisability             | Discuss the generalisability (external validity) of the study results                                                                                                                                                                                                                                                                                                                                         |         |
| <b>Other information</b> |                              |                                                                                                                                                                                                                                                                                                                                                                                                               |         |
| 22                       | Funding                      | Give the source of funding and the role of the funders for the present study and, if applicable, for the original study on which the present article is based                                                                                                                                                                                                                                                 |         |
| TOT.                     |                              |                                                                                                                                                                                                                                                                                                                                                                                                               | 15      |

**STROBE CHECKLIST CROSS-SECTIONAL STUDIES - ARTICLE 21**

**TITLE:** Oral impacts on daily performances and its socio-demographic and clinical distribution: a cross-sectional study of adolescents living in Maasai population areas, Tanzania

**Simangwa et al.(2020)**

| Item                |                                 | Recommendation                                                                                                                                                                                    | Page n° |
|---------------------|---------------------------------|---------------------------------------------------------------------------------------------------------------------------------------------------------------------------------------------------|---------|
| <b>1</b>            | <b>Title and Abstract</b>       | (a) Indicate the study's design with a commonly used term in the title or the abstract                                                                                                            | 1       |
|                     |                                 | (b) Provide in the abstract an informative and balanced summary of what was done and what was found                                                                                               | 1       |
| <b>Introduction</b> |                                 |                                                                                                                                                                                                   |         |
| <b>2</b>            | <i>Background/Rationale</i>     | Explain the scientific background and rationale for the investigation being reported                                                                                                              | 2       |
| <b>3</b>            | <i>Objectives</i>               | State specific objectives, including any prespecified hypotheses                                                                                                                                  | 2       |
| <b>Methods</b>      |                                 |                                                                                                                                                                                                   |         |
| <b>4</b>            | <i>Study design</i>             | Present key elements of study design early in the paper                                                                                                                                           | 2       |
| <b>5</b>            | <i>Setting</i>                  | Describe the setting, locations, and relevant dates, including periods of recruitment, exposure, follow-up, and data collection                                                                   | 2-3     |
| <b>6</b>            | <i>Participants</i>             | (a) Give the eligibility criteria, and the sources and methods of selection of participants                                                                                                       | 2-3     |
| <b>7</b>            | <i>Variables</i>                | Clearly define all outcomes, exposures, predictors, potential confounders, and effect modifiers. Give diagnostic criteria, if applicable                                                          | 3-4     |
| <b>8</b>            | <i>Data sources/measurement</i> | For each variable of interest, give sources of data and details of methods of assessment (measurement). Describe comparability of assessment methods if there is more than one group              | 3-4     |
| <b>9</b>            | <i>Bias</i>                     | Describe any efforts to address potential sources of bias                                                                                                                                         |         |
| <b>10</b>           | <i>Study size</i>               | Explain how the study size was arrived at                                                                                                                                                         | 3       |
| <b>11</b>           | <i>Quantitative variables</i>   | Explain how quantitative variables were handled in the analyses. If applicable, describe which groupings were chosen and why                                                                      |         |
| <b>12</b>           | <i>Statistical methods</i>      | (a) Describe all statistical methods, including those used to control for confounding                                                                                                             | 4-5     |
|                     |                                 | (b) Describe any methods used to examine subgroups and interactions                                                                                                                               |         |
|                     |                                 | (c) Explain how missing data were addressed                                                                                                                                                       |         |
|                     |                                 | (d) If applicable, describe analytical methods taking account of sampling strategy                                                                                                                |         |
|                     |                                 | (e) Describe any sensitivity analyses                                                                                                                                                             |         |
| <b>Results</b>      |                                 |                                                                                                                                                                                                   |         |
| <b>13</b>           | <i>Participants</i>             | (a) Report numbers of individuals at each stage of study—eg numbers potentially eligible, examined for eligibility, confirmed eligible, included in the study, completing follow-up, and analysed | 5       |
|                     |                                 | (b) Give reasons for non-participation at each stage                                                                                                                                              |         |
|                     |                                 | (c) Consider use of a flow diagram                                                                                                                                                                |         |

|                          |                         |                                                                                                                                                                                                                                                                                                                                                                                                               |           |
|--------------------------|-------------------------|---------------------------------------------------------------------------------------------------------------------------------------------------------------------------------------------------------------------------------------------------------------------------------------------------------------------------------------------------------------------------------------------------------------|-----------|
| 14                       | <i>Descriptive data</i> | (a) Give characteristics of study participants (eg demographic, clinical, social) and information on exposures and potential confounders<br>(b) Indicate number of participants with missing data for each variable of interest                                                                                                                                                                               | 5-9       |
| 15                       | <i>Outcome data</i>     | Report numbers of outcome events or summary measures                                                                                                                                                                                                                                                                                                                                                          | 5-9       |
| 16                       | <i>Main results</i>     | (a) Give unadjusted estimates and, if applicable, confounder-adjusted estimates and their precision (eg, 95% confidence interval). Make clear which confounders were adjusted for and why they were included<br>(b) Report category boundaries when continuous variables were categorized<br>(c) If relevant, consider translating estimates of relative risk into absolute risk for a meaningful time period |           |
| 17                       | <i>Other analyses</i>   | Report other analyses done—eg analyses of subgroups and interactions, and sensitivity analyses                                                                                                                                                                                                                                                                                                                |           |
| <b>Discussion</b>        |                         |                                                                                                                                                                                                                                                                                                                                                                                                               |           |
| 18                       | <i>Key results</i>      | Summarise key results with reference to study objectives                                                                                                                                                                                                                                                                                                                                                      | 5         |
| 19                       | <i>Limitations</i>      | Discuss limitations of the study, taking into account sources of potential bias or imprecision. Discuss both direction and magnitude of any potential bias                                                                                                                                                                                                                                                    | 8-9       |
| 20                       | <i>Interpretation</i>   | Give a cautious overall interpretation of results considering objectives, limitations, multiplicity of analyses, results from similar studies, and other relevant evidence                                                                                                                                                                                                                                    | 5-8       |
| 21                       | <i>Generalisability</i> | Discuss the generalisability (external validity) of the study results                                                                                                                                                                                                                                                                                                                                         | 8         |
| <b>Other information</b> |                         |                                                                                                                                                                                                                                                                                                                                                                                                               |           |
| 22                       | <i>Funding</i>          | Give the source of funding and the role of the funders for the present study and, if applicable, for the original study on which the present article is based                                                                                                                                                                                                                                                 | 10        |
| <b>TOT.</b>              |                         |                                                                                                                                                                                                                                                                                                                                                                                                               | <b>18</b> |

## STROBE CHECKLIST CROSS-SECTIONAL STUDIES - ARTICLE 22

TITLE: Impact of caries experience on quality of life related to bucal health, Machángara, Ecuador

Vélez-Vásquez et al.(2019)

| Item                | Recommendation              |                                                                                                                                                                                               | Page n°        |
|---------------------|-----------------------------|-----------------------------------------------------------------------------------------------------------------------------------------------------------------------------------------------|----------------|
| 1                   | <b>Title and Abstract</b>   | (a) Indicate the study's design with a commonly used term in the title or the abstract<br>(b) Provide in the abstract an informative and balanced summary of what was done and what was found | 203<br>203-204 |
| <b>Introduction</b> |                             |                                                                                                                                                                                               |                |
| 2                   | <i>Background/Rationale</i> | Explain the scientific background and rationale for the investigation being reported                                                                                                          | 204            |
| 3                   | <i>Objectives</i>           | State specific objectives, including any prespecified hypotheses                                                                                                                              | 204            |
| <b>Methods</b>      |                             |                                                                                                                                                                                               |                |
| 4                   | <i>Study design</i>         | Present key elements of study design early in the paper                                                                                                                                       | 205            |
| 5                   | <i>Setting</i>              | Describe the setting, locations, and relevant dates, including periods of recruitment, exposure, follow-up, and data collection                                                               | 205            |

|                          |                              |                                                                                                                                                                                                                                                                                                                                                                                                               |           |
|--------------------------|------------------------------|---------------------------------------------------------------------------------------------------------------------------------------------------------------------------------------------------------------------------------------------------------------------------------------------------------------------------------------------------------------------------------------------------------------|-----------|
| 6                        | Participants                 | (a) Give the eligibility criteria, and the sources and methods of selection of participants                                                                                                                                                                                                                                                                                                                   | 205       |
| 7                        | Variables                    | Clearly define all outcomes, exposures, predictors, potential confounders, and effect modifiers. Give diagnostic criteria, if applicable                                                                                                                                                                                                                                                                      | 205       |
| 8                        | Data sources/<br>measurement | For each variable of interest, give sources of data and details of methods of assessment (measurement). Describe comparability of assessment methods if there is more than one group                                                                                                                                                                                                                          | 205       |
| 9                        | Bias                         | Describe any efforts to address potential sources of bias                                                                                                                                                                                                                                                                                                                                                     |           |
| 10                       | Study size                   | Explain how the study size was arrived at                                                                                                                                                                                                                                                                                                                                                                     | 205       |
| 11                       | Quantitative<br>variables    | Explain how quantitative variables were handled in the analyses. If applicable, describe which groupings were chosen and why                                                                                                                                                                                                                                                                                  |           |
| 12                       | Statistical<br>methods       | (a) Describe all statistical methods, including those used to control for confounding<br>(b) Describe any methods used to examine subgroups and interactions<br>(c) Explain how missing data were addressed<br>(d) If applicable, describe analytical methods taking account of sampling strategy<br>(e) Describe any sensitivity analyses                                                                    | 205       |
| <b>Results</b>           |                              |                                                                                                                                                                                                                                                                                                                                                                                                               |           |
| 13                       | Participants                 | (a) Report numbers of individuals at each stage of study—eg numbers potentially eligible, examined for eligibility, confirmed eligible, included in the study, completing follow-up, and analysed<br>(b) Give reasons for non-participation at each stage<br>(c) Consider use of a flow diagram                                                                                                               | 205       |
| 14                       | Descriptive data             | (a) Give characteristics of study participants (eg demographic, clinical, social) and information on exposures and potential confounders<br>(b) Indicate number of participants with missing data for each variable of interest                                                                                                                                                                               | 205-210   |
| 15                       | Outcome data                 | Report numbers of outcome events or summary measures                                                                                                                                                                                                                                                                                                                                                          | 205-210   |
| 16                       | Main results                 | (a) Give unadjusted estimates and, if applicable, confounder-adjusted estimates and their precision (eg, 95% confidence interval). Make clear which confounders were adjusted for and why they were included<br>(b) Report category boundaries when continuous variables were categorized<br>(c) If relevant, consider translating estimates of relative risk into absolute risk for a meaningful time period | 205-210   |
| 17                       | Other analyses               | Report other analyses done—eg analyses of subgroups and interactions, and sensitivity analyses                                                                                                                                                                                                                                                                                                                |           |
| <b>Discussion</b>        |                              |                                                                                                                                                                                                                                                                                                                                                                                                               |           |
| 18                       | Key results                  | Summarise key results with reference to study objectives                                                                                                                                                                                                                                                                                                                                                      | 210       |
| 19                       | Limitations                  | Discuss limitations of the study, taking into account sources of potential bias or imprecision. Discuss both direction and magnitude of any potential bias                                                                                                                                                                                                                                                    | 211       |
| 20                       | Interpretation               | Give a cautious overall interpretation of results considering objectives, limitations, multiplicity of analyses, results from similar studies, and other relevant evidence                                                                                                                                                                                                                                    | 210-211   |
| 21                       | Generalisability             | Discuss the generalisability (external validity) of the study results                                                                                                                                                                                                                                                                                                                                         | 211       |
| <b>Other information</b> |                              |                                                                                                                                                                                                                                                                                                                                                                                                               |           |
| 22                       | Funding                      | Give the source of funding and the role of the funders for the present study and, if applicable, for the original study on which the present article is based                                                                                                                                                                                                                                                 | 211       |
| <b>TOT.</b>              |                              |                                                                                                                                                                                                                                                                                                                                                                                                               | <b>19</b> |

**STROBE CHECKLIST CROSS-SECTIONAL STUDIES - ARTICLE 23**

**TITLE:** Orthodontic Treatment Need, Self-Esteem, and Oral Health-Related Quality of Life Assessment of Primary Schoolchildren: A Cross-Sectional Pilot Study

**Yetkiner et al.(2014)**

| Item      | Recommendation                                                                                      |                                                                                                                                                                                                   | Page n°                 |
|-----------|-----------------------------------------------------------------------------------------------------|---------------------------------------------------------------------------------------------------------------------------------------------------------------------------------------------------|-------------------------|
| <b>1</b>  | <b>Title and Abstract</b>                                                                           |                                                                                                                                                                                                   | <a href="#">182</a>     |
|           | (a) Indicate the study's design with a commonly used term in the title or the abstract              |                                                                                                                                                                                                   |                         |
|           | (b) Provide in the abstract an informative and balanced summary of what was done and what was found |                                                                                                                                                                                                   | <a href="#">182</a>     |
|           | <b>Introduction</b>                                                                                 |                                                                                                                                                                                                   |                         |
| <b>2</b>  | <i>Background/Rationale</i>                                                                         | Explain the scientific background and rationale for the investigation being reported                                                                                                              | <a href="#">182-183</a> |
| <b>3</b>  | <i>Objectives</i>                                                                                   | State specific objectives, including any prespecified hypotheses                                                                                                                                  | <a href="#">183</a>     |
|           | <b>Methods</b>                                                                                      |                                                                                                                                                                                                   |                         |
| <b>4</b>  | <i>Study design</i>                                                                                 | Present key elements of study design early in the paper                                                                                                                                           | <a href="#">183</a>     |
| <b>5</b>  | <i>Setting</i>                                                                                      | Describe the setting, locations, and relevant dates, including periods of recruitment, exposure, follow-up, and data collection                                                                   | <a href="#">183</a>     |
| <b>6</b>  | <i>Participants</i>                                                                                 | (a) Give the eligibility criteria, and the sources and methods of selection of participants                                                                                                       | <a href="#">183</a>     |
| <b>7</b>  | <i>Variables</i>                                                                                    | Clearly define all outcomes, exposures, predictors, potential confounders, and effect modifiers. Give diagnostic criteria, if applicable                                                          | <a href="#">183-184</a> |
| <b>8</b>  | <i>Data sources/measurement</i>                                                                     | For each variable of interest, give sources of data and details of methods of assessment (measurement). Describe comparability of assessment methods if there is more than one group              | <a href="#">183-184</a> |
| <b>9</b>  | <i>Bias</i>                                                                                         | Describe any efforts to address potential sources of bias                                                                                                                                         |                         |
| <b>10</b> | <i>Study size</i>                                                                                   | Explain how the study size was arrived at                                                                                                                                                         | <a href="#">183</a>     |
| <b>11</b> | <i>Quantitative variables</i>                                                                       | Explain how quantitative variables were handled in the analyses. If applicable, describe which groupings were chosen and why                                                                      |                         |
| <b>12</b> | <i>Statistical methods</i>                                                                          | (a) Describe all statistical methods, including those used to control for confounding                                                                                                             | <a href="#">184</a>     |
|           |                                                                                                     | (b) Describe any methods used to examine subgroups and interactions                                                                                                                               |                         |
|           |                                                                                                     | (c) Explain how missing data were addressed                                                                                                                                                       |                         |
|           |                                                                                                     | (d) If applicable, describe analytical methods taking account of sampling strategy                                                                                                                |                         |
|           |                                                                                                     | (e) Describe any sensitivity analyses                                                                                                                                                             |                         |
|           | <b>Results</b>                                                                                      |                                                                                                                                                                                                   |                         |
| <b>13</b> | <i>Participants</i>                                                                                 | (a) Report numbers of individuals at each stage of study—eg numbers potentially eligible, examined for eligibility, confirmed eligible, included in the study, completing follow-up, and analysed | <a href="#">184</a>     |
|           |                                                                                                     | (b) Give reasons for non-participation at each stage                                                                                                                                              |                         |
|           |                                                                                                     | (c) Consider use of a flow diagram                                                                                                                                                                |                         |
| <b>14</b> | <i>Descriptive data</i>                                                                             | (a) Give characteristics of study participants (eg demographic, clinical, social) and information on exposures and potential confounders                                                          | <a href="#">184-187</a> |

|      |                          |                                                                                                                                                                                                              |         |
|------|--------------------------|--------------------------------------------------------------------------------------------------------------------------------------------------------------------------------------------------------------|---------|
|      |                          | (b) Indicate number of participants with missing data for each variable of interest                                                                                                                          |         |
| 15   | Outcome data             | Report numbers of outcome events or summary measures                                                                                                                                                         | 184-187 |
| 16   | Main results             | (a) Give unadjusted estimates and, if applicable, confounder-adjusted estimates and their precision (eg, 95% confidence interval). Make clear which confounders were adjusted for and why they were included | 184-187 |
|      |                          | (b) Report category boundaries when continuous variables were categorized                                                                                                                                    |         |
|      |                          | (c) If relevant, consider translating estimates of relative risk into absolute risk for a meaningful time period                                                                                             |         |
| 17   | Other analyses           | Report other analyses done—eg analyses of subgroups and interactions, and sensitivity analyses                                                                                                               |         |
|      | <b>Discussion</b>        |                                                                                                                                                                                                              |         |
| 18   | Key results              | Summarise key results with reference to study objectives                                                                                                                                                     | 185     |
| 19   | Limitations              | Discuss limitations of the study, taking into account sources of potential bias or imprecision. Discuss both direction and magnitude of any potential bias                                                   | 185     |
| 20   | Interpretation           | Give a cautious overall interpretation of results considering objectives, limitations, multiplicity of analyses, results from similar studies, and other relevant evidence                                   | 185-188 |
| 21   | Generalisability         | Discuss the generalisability (external validity) of the study results                                                                                                                                        | 188     |
|      | <b>Other information</b> |                                                                                                                                                                                                              |         |
| 22   | Funding                  | Give the source of funding and the role of the funders for the present study and, if applicable, for the original study on which the present article is based                                                |         |
| TOT. |                          |                                                                                                                                                                                                              | 18      |



**Table S2.** Evidence Tables.**Evidence Table for Cross Sectional Studies (Based on Flc 3.0, Designed by Authors)**

*This is the summary table for the evaluation of the methodological quality of the study. Keeping in mind your answers to the 6 areas that appear on this screen, assess the quality of the evidence provided by the analysed study.*

|                                                                                     |                   |                         |                  |                   |
|-------------------------------------------------------------------------------------|-------------------|-------------------------|------------------|-------------------|
| <b>Research Question</b>                                                            |                   |                         |                  |                   |
| <i>Is the study based on a clearly defined research question?</i>                   | YES               | NO                      | PARTIALLY        | WITHOUT DATA/INFO |
| <b>Method</b>                                                                       |                   |                         |                  |                   |
| <i>Has the study method allowed to minimize bias?</i>                               | YES               | NO                      | PARTIALLY        | WITHOUT DATA/INFO |
| <b>Results</b>                                                                      |                   |                         |                  |                   |
| <i>Are the results correctly synthesized and described?</i>                         | YES               | NO                      | PARTIALLY        | WITHOUT DATA/INFO |
| <b>Conclusions</b>                                                                  |                   |                         |                  |                   |
| <i>Are the conclusions justified?</i>                                               | YES               | NO                      | PARTIALLY        | WITHOUT DATA/INFO |
| <b>External validity</b>                                                            |                   |                         |                  |                   |
| <i>Are study results generalizable to the population and context that interest?</i> | YES               | NO                      | PARTIALLY        | WITHOUT DATA/INFO |
| <b>Conflict of interest</b>                                                         |                   |                         |                  |                   |
| <i>Is the existence or absence of conflict of interest well described?</i>          | YES               | NO                      | PARTIALLY        | WITHOUT DATA/INFO |
| <i>As guidelines you may consider the following suggestions:</i>                    |                   |                         |                  |                   |
|                                                                                     | <b>Method YES</b> | <b>Method PARTIALLY</b> | <b>Method NO</b> |                   |
| <b>Majority other criteria YES</b>                                                  | High quality      | Medium quality          | Low quality      |                   |
| <b>Majority other criteria PARTIALLY</b>                                            | Medium quality    | Medium quality          | Low quality      |                   |
| <b>Majority other criteria NO</b>                                                   | Low quality       | Low quality             | Low quality      |                   |

| REFERENCE         | RESEARCH QUESTION<br>(population/intervention/ outcome)                                                                                                                                                                                          | METHODOLOGY                                                                                                                                                                                                                                                                                                                                                                                                                                                                                                      | RESULTS                                          | CONCLUSIONS                                 | CONFLICT OF INTEREST               | EXTERNAL VALIDITY                                                                                                                 | QUALITY OF THE STUDY<br>High/medium/low |
|-------------------|--------------------------------------------------------------------------------------------------------------------------------------------------------------------------------------------------------------------------------------------------|------------------------------------------------------------------------------------------------------------------------------------------------------------------------------------------------------------------------------------------------------------------------------------------------------------------------------------------------------------------------------------------------------------------------------------------------------------------------------------------------------------------|--------------------------------------------------|---------------------------------------------|------------------------------------|-----------------------------------------------------------------------------------------------------------------------------------|-----------------------------------------|
| ALVES et al. 2015 | <p><b>Population:</b><br/><b>12 years old</b></p> <p><b>Intervention:</b><br/>Clinical exam; C-OIDP; family development index (FDI); interview on propensity-related need.</p> <p><b>Outcomes:</b><br/><b>Impact prevalence; mean C-OIDP</b></p> | <p>Study design: Cross-sectional</p> <p><b>Objectives:</b><br/>stated</p> <p><b>Setting and time:</b><br/>- <b>setting:</b> Manguinhos<br/>- <b>time:</b> not stated</p> <p><b>Eligibility criteria:</b><br/>Stated</p> <p><b>Statistical analysis:</b><br/>Association analysis with Chi square test; Kruskal Wallis test; Spearman correlation coefficient; McNemar's test.</p> <p><b>Other:</b><br/>Sample size calculation.<br/>Simple random sampling.</p> <p><b>Absent:</b><br/>examiners calibration;</p> | <p>Correctly synthesize d and described: Yes</p> | <p>Are conclusions justified? Partially</p> | <p>Is it described? <b>Yes</b></p> | <p>Are results generalisable to the general population?<br/><br/><b>No, only to deprived groups of adolescents</b><br/><br/>.</p> | <b>MEDIUM</b>                           |

questionnaire C-  
OIDP not  
described

YES

PARTIALLY

YES

PARTIALLY

YES

PARTIALLY

MEDIUM

| REFE-<br>RENCE<br><br>Author/year | RESEARCH<br>QUESTION<br><br>(population/interventi<br>on/ outcome)                                                                                                                                                                  | METHODOLO<br>GY                                                                                                                                                                                                                                                                                                                                                                                                                                                                                                                                                                                                     | RESULTS                                               | CONCLUSIO<br>NS                                                                                                                                                                                                                                                                                                                                                                   | CONFLIC<br>T OF<br>INTERES<br>T                                | EXTERNAL<br>VALIDITY                                                                                                                                                                                                                                              | QUALITY OF<br>THE STUDY<br><br>High/medium/lo<br>w |
|-----------------------------------|-------------------------------------------------------------------------------------------------------------------------------------------------------------------------------------------------------------------------------------|---------------------------------------------------------------------------------------------------------------------------------------------------------------------------------------------------------------------------------------------------------------------------------------------------------------------------------------------------------------------------------------------------------------------------------------------------------------------------------------------------------------------------------------------------------------------------------------------------------------------|-------------------------------------------------------|-----------------------------------------------------------------------------------------------------------------------------------------------------------------------------------------------------------------------------------------------------------------------------------------------------------------------------------------------------------------------------------|----------------------------------------------------------------|-------------------------------------------------------------------------------------------------------------------------------------------------------------------------------------------------------------------------------------------------------------------|----------------------------------------------------|
| ALZAHRA<br>NI et al.<br>2019      | <b>Population:</b><br><b>Males 12 –15 years old</b><br><br><b>Intervention:</b><br>Clinical exam; C-OIDP;<br>questionnaire with<br>sociodemographic data<br><br><b>Outcomes:</b><br><b>Impact prevalence;</b><br><b>mean C-OIDP</b> | Study design:<br>Cross-sectional<br><br><b>Objectives:</b><br>Stated<br><br><b>Setting and time:</b><br>- <b>setting:</b> not<br>stated -<br><br><b>time:</b> Nov 2017 to<br>Jan 2018<br><br><b>Eligibility</b><br><b>criteria:</b><br>Stated; females<br>not included for<br>cultural reasons,<br>as examiners were<br>men.<br><br><b>Statistical</b><br><b>analysis:</b><br>association<br>analysis with Chi<br>square test;<br>Multivariate<br>logistic regression<br>model; Odds ratio;<br>Nagelkerke R2<br>value<br><br><b>Other:</b><br>Sample size<br>calculation. 2 stage<br>randomised<br>sampling method. | Correctly<br>synthesize<br>d and<br>described:<br>Yes | Are<br>conclusions<br>justified?<br><br>Partially<br><br><b>Mistake in</b><br><b>conclusions:</b><br><severity of<br>impacts was<br>high>: majority<br>of participants<br>reported<br>moderate or<br>minor severity.<br>They say being<br>a cross sectional<br>design is a<br>“limitation”<br>itself.<br>Implications of<br>key findings is<br>not clear.<br>Poor<br>conclusions. | <b>Is it</b><br><b>described</b><br><b>?</b><br><br><b>Yes</b> | <b>Are results</b><br><b>generalisab</b><br><b>le to the</b><br><b>general</b><br><b>population?</b><br><br><b>No; only to</b><br><b>males in</b><br><b>that Arabic</b><br><b>region.</b><br><b>Sample</b><br><b>from 3</b><br><b>dissimilar</b><br><b>areas.</b> | MEDIUM                                             |

Clinical exam on  
WHO guideline  
1997. Adaptation  
of the C-OIDP to  
Arabic. Explain  
the C-OIDP  
questionnaire

**Mistake:**

written “intra-  
examiner  
agreement” while  
they refer to  
“inter-examiner  
agreement”  
(between 2  
different  
examiners.)  
Only males  
participants

YES

PARTIALLY

YES

PARTIALLY

YES

NO

MEDIUM

| REFE-<br>RENCE           | RESEARCH<br>QUESTION<br>(population/interventi<br>on/ outcome)                                                                                                                                                                             | METHODOLO<br>GY                                                                                                                                                                                                                                                                                                                                                                                                                                                                                                                                                    | RESULTS                                                             | CONCLUSIO<br>NS                                                                                                                                                                                                                                                                                                                 | CONFLIC<br>T OF<br>INTERES<br>T             | EXTERNAL<br>VALIDITY                                                                                                                                                        | QUALITY OF<br>THE STUDY<br>High/medium/lo<br>w |
|--------------------------|--------------------------------------------------------------------------------------------------------------------------------------------------------------------------------------------------------------------------------------------|--------------------------------------------------------------------------------------------------------------------------------------------------------------------------------------------------------------------------------------------------------------------------------------------------------------------------------------------------------------------------------------------------------------------------------------------------------------------------------------------------------------------------------------------------------------------|---------------------------------------------------------------------|---------------------------------------------------------------------------------------------------------------------------------------------------------------------------------------------------------------------------------------------------------------------------------------------------------------------------------|---------------------------------------------|-----------------------------------------------------------------------------------------------------------------------------------------------------------------------------|------------------------------------------------|
| AMALIA<br>et al.<br>2015 | <p><b>Population:</b><br/><b>12 years old</b></p> <p><b>Intervention:</b><br/>Clinical exam; CS-C-<br/>OIDP; questionnaire<br/>with sociodemographic<br/>data</p> <p><b>Outcomes:</b><br/><b>Impact prevalence;<br/>mean CS-C-OIDP</b></p> | <p><b>Study design:</b><br/>Cross-sectional</p> <p><b>Objectives:</b><br/>Stated</p> <p><b>Setting and time:</b><br/>not stated</p> <p><b>Eligibility<br/>criteria:</b><br/>Stated</p> <p><b>Statistical<br/>analysis:</b><br/>association<br/>analysis Chi<br/>square test;<br/>Regression<br/>analysis; negative<br/>binomial<br/>regression<br/>analysis</p> <p><b>Other:</b><br/>Sample size<br/>calculation: not<br/>based on power<br/>analysis.<br/>4 dental nurses<br/>were trained to<br/>collect C-OIDP.<br/>Good<br/>explanation of<br/>the survey.</p> | <p>Correctly<br/>synthesize<br/>d and<br/>described:</p> <p>Yes</p> | <p>Are<br/>conclusions<br/>justified?</p> <p>Partially<br/>Validity of CS-<br/>C-OIDP as an<br/>outcome<br/>measure for<br/>oral health<br/>programs has<br/>not been yet<br/>established.<br/>A more detailed<br/>measurements<br/>of caries is<br/>required than<br/>DT used in this<br/>study.<br/>Poor<br/>conclusions.</p> | <p>Is it<br/>described<br/>?</p> <p>Yes</p> | <p>Are results<br/>generalisabl<br/>e to the<br/>general<br/>population?<br/>No.<br/>(convenienc<br/>e sample,<br/>sample size<br/>not based<br/>on power<br/>analysis)</p> | MEDIUM                                         |

Inter-examiner  
and intra-  
examiner  
reliability were  
assessed.

**Limitation:**

Convenience  
sample

YES

PARTIALLY

YES

PARTIALLY

YES

NO

MEDIUM

| REFE-<br>RENCE           | RESEARCH<br>QUESTION                                                                                                                                                                                                                                             | METHODOLO<br>GY                                                                                                                                                                                                                                                                                                                                                                                                                                                                                                                                | RESULTS                                                                                                                                                                                                                                                                                                                                                                                                                                                                                                                                           | CONCLUSIO<br>NS                                                                                                                                                                                                                                                                                                                                                                                                                                                                                                                                 | CONFLIC<br>T OF<br>INTERES<br>T                                                                                                                                                                                                  | EXTERNAL<br>VALIDITY | QUALITY OF<br>THE STUDY |
|--------------------------|------------------------------------------------------------------------------------------------------------------------------------------------------------------------------------------------------------------------------------------------------------------|------------------------------------------------------------------------------------------------------------------------------------------------------------------------------------------------------------------------------------------------------------------------------------------------------------------------------------------------------------------------------------------------------------------------------------------------------------------------------------------------------------------------------------------------|---------------------------------------------------------------------------------------------------------------------------------------------------------------------------------------------------------------------------------------------------------------------------------------------------------------------------------------------------------------------------------------------------------------------------------------------------------------------------------------------------------------------------------------------------|-------------------------------------------------------------------------------------------------------------------------------------------------------------------------------------------------------------------------------------------------------------------------------------------------------------------------------------------------------------------------------------------------------------------------------------------------------------------------------------------------------------------------------------------------|----------------------------------------------------------------------------------------------------------------------------------------------------------------------------------------------------------------------------------|----------------------|-------------------------|
| Author/ye<br>ar          | (population/interventi<br>on/ outcome)                                                                                                                                                                                                                           |                                                                                                                                                                                                                                                                                                                                                                                                                                                                                                                                                |                                                                                                                                                                                                                                                                                                                                                                                                                                                                                                                                                   |                                                                                                                                                                                                                                                                                                                                                                                                                                                                                                                                                 |                                                                                                                                                                                                                                  |                      | High/medium/lo<br>w     |
| ATHIRA<br>et al.<br>2015 | <b>Population:</b><br><br><b>12 -17 years old</b><br><br><b>Intervention:</b><br>Clinical exam; C-OIDP;<br>questionnaire with<br>sociodemographic data<br><br><b>Outcomes:</b><br><b>missing Impact</b><br><b>prevalence; mean C-</b><br><b>OIDP categorised</b> | <b>Study design:</b><br>Cross-sectional<br><br><b>Objectives:</b><br>Stated<br><br><b>Setting and time:</b><br>- <b>setting:</b> stated<br>- <b>time:</b> not stated<br><br><b>Eligibility</b><br><b>criteria:</b><br>Stated<br><br><b>Statistical</b><br><b>analysis:</b><br>association<br>analysis with Chi<br>square test;<br>Student's t test;<br>ANOVA.<br><br><b>Other:</b><br>Sample size<br>calculation based<br>on power<br>analysis. C-OIDP:<br>good explanation<br>of the survey.<br>Intraexaminer<br>reliability was<br>assessed. | <b>Correctly</b><br><b>synthesize</b><br><b>d and</b><br><b>described:</b><br>missing<br>mean C-<br>OIDP<br>score.<br>Otherwise,<br>OK.<br><br><b>Otherwise,</b><br>OK.<br><br><b>Eligibility</b><br><b>criteria:</b><br>Stated<br><br><b>Statistical</b><br><b>analysis:</b><br>association<br>analysis with Chi<br>square test;<br>Student's t test;<br>ANOVA.<br><br><b>Other:</b><br>Sample size<br>calculation based<br>on power<br>analysis. C-OIDP:<br>good explanation<br>of the survey.<br>Intraexaminer<br>reliability was<br>assessed. | <b>Are</b><br><b>conclusions</b><br><b>justified?</b><br><br>Partially.<br><br>"Participants<br>were in early<br>stage of<br>adolescence<br>and hence no<br>gender<br>difference was<br>found in C-<br>OIDP" (not<br>exactly, age<br>span was: 12-17<br>years old, that is<br>not "early<br>stage").<br>37,3% had C-<br>OIDP score<br>between 1-10<br>("considerable<br>impact" in the<br>opinion of the<br>author, we<br>disagree).<br>"The majority<br>of subjects<br>scored zero C-<br>OIDP" (wrong:<br>only 43,1%).<br>Poor<br>conclusions. | <b>Is it</b><br><b>described</b><br><b>?</b><br><br><b>No</b><br><br><b>Are results</b><br><b>generalisabl</b><br><b>e to the</b><br><b>general</b><br><b>population?</b><br><b>No</b><br><b>(convenienc</b><br><b>e sample)</b> | <b>LOW</b>           |                         |



**Limitation:**

Convenience  
sample

YES

PARTIALLY

YES

PARTIALLY

NO

NO

LOW

| REFE-<br>RENCE            | RESEARCH<br>QUESTION<br>(population/interventi<br>on/ outcome)                                                                                                                                                                       | METHODOLO<br>GY                                                                                                                                                                                                                                                                                                                                                                                                                                                                                                        | RESULTS                                                                                                                                                                                                                                                                                                                                                                                   | CONCLUSIO<br>NS                                | CONFLIC<br>T OF<br>INTERES<br>T      | EXTERNAL<br>VALIDITY                                                            | QUALITY OF<br>THE STUDY<br>High/medium/L<br>ow |
|---------------------------|--------------------------------------------------------------------------------------------------------------------------------------------------------------------------------------------------------------------------------------|------------------------------------------------------------------------------------------------------------------------------------------------------------------------------------------------------------------------------------------------------------------------------------------------------------------------------------------------------------------------------------------------------------------------------------------------------------------------------------------------------------------------|-------------------------------------------------------------------------------------------------------------------------------------------------------------------------------------------------------------------------------------------------------------------------------------------------------------------------------------------------------------------------------------------|------------------------------------------------|--------------------------------------|---------------------------------------------------------------------------------|------------------------------------------------|
| BAKTIAR<br>et al.<br>2014 | <b>Population:</b><br><b>11-13 years old</b><br><br><b>Intervention:</b><br>Clinical exam;<br>questionnaire<br><br><b>Outcomes:</b><br><b>Impact prevalence;</b><br><b>Mean C-OIDP score</b><br>DMFT; Loe and Silnes<br>plaque index | <b>Study design:</b><br>Cross sectional<br><br><b>Objectives:</b><br><br><b>Setting and time:</b><br>- <b>setting:</b> stated<br>- <b>time:</b> time<br>period 2012<br><br><b>Eligibility criteria:</b><br>inclusion criteria<br>not stated;<br>exclusion criteria<br>stated<br><br><b>Statistical analysis:</b><br>Random cluster<br>sample;<br>Kolmogorov<br>Smirnov test;<br>non parametric<br>Mann Whitney<br>U-test and<br>Spearman<br>correlation.<br><br><b>Mistake:</b><br>Some mistakes in<br>English writing | <b>Correctly synthesized and described:</b><br>No<br>Mean C-OIDP<br>score shows<br>different<br>value in<br>“Results” and<br>“Material and<br>methods”<br><br><b>In “Results”:</b><br>There is<br>association<br>between<br>DMFT/C-<br>OIDP and<br>bacterial<br>plaque/ C-<br>OIDP.<br><br><b>In “Discussion”:</b><br>There is also<br>association<br>between<br>malocclusion/<br>C-OIDP. | <b>Are conclusions justified?</b><br>Partially | <b>Is it described?</b><br><b>No</b> | <b>Are results generalisable to the general population?</b><br><b>Partially</b> | <b>MEDIUM</b>                                  |

|     |           |           |           |    |           |        |
|-----|-----------|-----------|-----------|----|-----------|--------|
|     |           |           |           |    |           |        |
| YES | PARTIALLY | PARTIALLY | PARTIALLY | NO | PARTIALLY | MEDIUM |

| REFERENCE             | RESEARCH QUESTION                                                                                                                                                                                                | METHODOLOGY                                                                                                                                                                                                                                                                                                                                                                                                                                                                                                              | RESULTS                                             | CONCLUSIONS                    | CONFLICT OF INTEREST | EXTERNAL VALIDITY                                                                        | QUALITY OF THE STUDY |
|-----------------------|------------------------------------------------------------------------------------------------------------------------------------------------------------------------------------------------------------------|--------------------------------------------------------------------------------------------------------------------------------------------------------------------------------------------------------------------------------------------------------------------------------------------------------------------------------------------------------------------------------------------------------------------------------------------------------------------------------------------------------------------------|-----------------------------------------------------|--------------------------------|----------------------|------------------------------------------------------------------------------------------|----------------------|
| Author/year           | (population/intervention/ outcome)                                                                                                                                                                               |                                                                                                                                                                                                                                                                                                                                                                                                                                                                                                                          |                                                     | NS                             |                      |                                                                                          | High/medium/low      |
| BASAVARAJ et al. 2014 | <b>Population:</b><br><b>12 and 15 years old</b><br><br><b>Intervention:</b><br>Clinical exam; C-OIDP; questionnaire with sociodemographic data<br><br><b>Outcomes:</b><br><b>Impact prevalence; mean C-OIDP</b> | <b>Study design:</b><br>Cross-sectional<br><br><b>Objectives:</b><br>Stated<br><br><b>Setting and time:</b><br>- <b>setting:</b> stated<br>- <b>time:</b> August–November 2012<br><br><b>Eligibility criteria:</b><br>exclusion stated<br><br><b>Statistical analysis:</b><br>descriptive statistics;<br>bivariate analysis with Chi square test; multiple logistic regression analysis<br><br><b>Other:</b><br>Sample size calculation: based on power analysis. C-OIDP: good explanation of the survey. Intra-examiner | Correctly synthesized and described: Yes<br><br>Yes | Are conclusions justified? Yes | Is it described? Yes | Are results generalisable to the general population? Yes, a city of approx. 180,000 hab. | HIGH                 |

reliability was  
assessed.; also,  
inter-examiner  
reliability.  
Examiner was  
calibrated. 2  
staged cluster  
sampling  
technique.  
Schools and  
subjects  
randomly  
selected.

YES

YES

YES

YES

YES

YES

HIGH

| REFE-<br>RENCE              | RESEARCH<br>QUESTION<br>(population/interventi<br>on/ outcome)                                                                                                             | METHODOLO<br>GY                                                                                                                                                                                                                                                                                                                                                                                                                                                                                                                                         | RESULTS                                               | CONCLUSIO<br>NS                      | CONFLIC<br>T OF<br>INTERES<br>T                   | EXTERNAL<br>VALIDITY                                                                                                                                | QUALITY OF<br>THE STUDY<br>High/medium/lo<br>w |
|-----------------------------|----------------------------------------------------------------------------------------------------------------------------------------------------------------------------|---------------------------------------------------------------------------------------------------------------------------------------------------------------------------------------------------------------------------------------------------------------------------------------------------------------------------------------------------------------------------------------------------------------------------------------------------------------------------------------------------------------------------------------------------------|-------------------------------------------------------|--------------------------------------|---------------------------------------------------|-----------------------------------------------------------------------------------------------------------------------------------------------------|------------------------------------------------|
| BERNABE<br>' et al.<br>2007 | <b>Population:</b><br><b>11-12 years old</b><br><br><b>Intervention:</b><br>Questionnaire<br><br><b>Outcomes:</b><br><b>Impact prevalence;</b><br><b>Mean C-OIDP score</b> | Study design:<br>Not stated<br>although it is<br>cross-sectional<br><br><b>Objectives:</b><br>Stated<br><br><b>Setting and time:</b><br>- <b>setting:</b> stated<br>- <b>time:</b> time<br>period 2006<br><br><b>Eligibility<br/>criteria:</b><br>Stated only<br>inclusion criteria<br><br><b>Statistical<br/>analysis:</b><br>Bivariate analysis<br>with chi square<br>test, Mann-<br>Whitney test and<br>Kruskal Wallis<br>test<br><br><b>Other:</b><br>Random cluster<br>sampling;<br>Sample size<br>calculation based<br>on impact<br>prevalence of | Correctly<br>synthesize<br>d and<br>described?<br>Yes | Are<br>conclusions<br>justified? Yes | <b>Is it<br/>described<br/>?</b><br><br><b>No</b> | <b>Are results<br/>generalisabl<br/>e to the<br/>general<br/>population?<br/>No, only to<br/>low-income<br/>urban<br/>communitie<br/>s in Peru.</b> | <b>MEDIUM</b>                                  |

50%, error of 5%  
and design effect  
of 2.5.  
Ethical approval  
obtained.

YES

PARTIALLY

YES

YES

NO

NO

MEDIUM

| REFERENCE          | RESEARCH QUESTION                                                                                                                                                                                                                    | METHODOLOGY                                                                                                                                                                                                                                                                                                                                                                                                                                                  | RESULTS                                                                                    | CONCLUSIONS | CONFLICT OF INTEREST | EXTERNAL VALIDITY                                                                                                                                           | QUALITY OF THE STUDY |
|--------------------|--------------------------------------------------------------------------------------------------------------------------------------------------------------------------------------------------------------------------------------|--------------------------------------------------------------------------------------------------------------------------------------------------------------------------------------------------------------------------------------------------------------------------------------------------------------------------------------------------------------------------------------------------------------------------------------------------------------|--------------------------------------------------------------------------------------------|-------------|----------------------|-------------------------------------------------------------------------------------------------------------------------------------------------------------|----------------------|
| Author/year        | (population/intervention/ outcome)                                                                                                                                                                                                   |                                                                                                                                                                                                                                                                                                                                                                                                                                                              |                                                                                            |             |                      |                                                                                                                                                             | High/medium/low      |
| BIANCO et al. 2009 | <p><b>Population:</b><br/><b>11-16 years old</b></p> <p><b>Intervention:</b><br/><b>Questionnaire;</b><br/><b>Interview; Oral examination</b></p> <p><b>Outcomes:</b><br/><b>Impact prevalence;</b><br/><b>Mean C-OIDP score</b></p> | <p>Study design:<br/>Cross sectional</p> <p>Objectives:<br/>Stated</p> <p>Setting and time:<br/>- setting: stated<br/>- time: January to April 2006</p> <p>Eligibility criteria:<br/>Not stated</p> <p>Statistical analysis:<br/>Stepwise multiple linear and logistic regression models</p> <p>Other:<br/>Randomly selected schools and participants.<br/>Pilot study.<br/>Informed consent obtained.<br/>Usage of pathologies list.<br/>Cross cultural</p> | <p>Correctly synthesize d and described?<br/>Yes</p> <p>Are conclusions justified? Yes</p> |             |                      | <p>Are results generalisable to the general population?<br/>Partially (although sample selection was randomised, the selection method is not explained)</p> | HIGH                 |



translation and  
validation to  
Italian. Ethics  
Committee  
approval.

YES

YES

YES

YES

NO

PARTIALLY

MEDIUM

| REFE-<br>RENCE           | RESEARCH<br>QUESTION                                                                                                                                                                                    | METHODOLO<br>GY                                                                                                                                                                                                                                                                                                                                                                                                                                                                                                                                                                                                     | RESULTS                                                   | CONCLUSIO<br>NS                      | CONFLIC<br>T OF<br>INTERES<br>T                           | EXTERNAL<br>VALIDITY                                                                                              | QUALITY OF<br>THE STUDY<br>High/medium/low |
|--------------------------|---------------------------------------------------------------------------------------------------------------------------------------------------------------------------------------------------------|---------------------------------------------------------------------------------------------------------------------------------------------------------------------------------------------------------------------------------------------------------------------------------------------------------------------------------------------------------------------------------------------------------------------------------------------------------------------------------------------------------------------------------------------------------------------------------------------------------------------|-----------------------------------------------------------|--------------------------------------|-----------------------------------------------------------|-------------------------------------------------------------------------------------------------------------------|--------------------------------------------|
| Author/year              | (population/intervention/ outcome)                                                                                                                                                                      |                                                                                                                                                                                                                                                                                                                                                                                                                                                                                                                                                                                                                     |                                                           |                                      |                                                           |                                                                                                                   |                                            |
| CASTRO<br>et al.<br>2011 | <b>Population:</b><br><b>11-12 years old</b><br><br><b>Intervention:</b><br>Questionnaire; clinical<br>exam; interview<br><br><b>Outcomes:</b><br><b>Impact prevalence;</b><br><b>mean C-OIDP score</b> | Study design:<br>Cross-sectional<br><br><b>Objectives:</b><br>Stated<br><br><b>Setting and time:</b><br>- <b>setting:</b> stated<br>- <b>time:</b> November<br>2007 and July<br>2008<br><b>Eligibility</b><br><b>criteria:</b><br>Informed consent<br>returned<br><b>Statistical</b><br><b>analysis:</b><br>Bivariate analysis<br>with Mann<br>Whitney test;<br>logistic<br>regression<br>analysis<br><b>Other:</b><br>Probabilistic<br>sample with<br>complex design.<br>Usage of<br>pathologies list.<br>Calibrated<br>examiners.<br>Clinical exam<br>was visual<br>without a probe.<br>Children were<br>randomly | Correctly<br>synthesize<br>d and<br>described?<br><br>Yes | Are<br>conclusions<br>justified? Yes | <b>Is it</b><br><b>described</b><br><b>?</b><br><b>No</b> | <b>Are results</b><br><b>generalisabl</b><br><b>e to the</b><br><b>general</b><br><b>population?</b><br><b>No</b> | <b>MEDIUM</b>                              |

selected from the  
subset of consent  
forms returned.

YES

PARTIALLY

YES

YES

NO

NO

MEDIUM

| REFE-<br>RENCE                              | RESEARCH<br>QUESTION<br>(population/interventi<br>on/ outcome)                                                                                                             | METHODOLO<br>GY                                                                                                                                                                                                                                                                                                                                                                                                                                                                                           | RESULTS                                               | CONCLUSIO<br>NS                      | CONFLIC<br>T OF<br>INTERES<br>T                           | EXTERNAL<br>VALIDITY                                                                                                                                              | QUALITY OF<br>THE STUDY<br>High/medium/lo<br>w |
|---------------------------------------------|----------------------------------------------------------------------------------------------------------------------------------------------------------------------------|-----------------------------------------------------------------------------------------------------------------------------------------------------------------------------------------------------------------------------------------------------------------------------------------------------------------------------------------------------------------------------------------------------------------------------------------------------------------------------------------------------------|-------------------------------------------------------|--------------------------------------|-----------------------------------------------------------|-------------------------------------------------------------------------------------------------------------------------------------------------------------------|------------------------------------------------|
| DEL<br>CASTILL<br>O LOPEZ<br>et al.<br>2014 | <b>Population:</b><br><b>11-12 years old</b><br><br><b>Intervention:</b><br><b>Questionnaire</b><br><br><b>Outcome:</b><br><b>Impact prevalence;</b><br><b>Mean C-OIDP</b> | <b>Study design:</b><br>Cross sectional<br><br><b>Objectives:</b><br>Stated<br><br><b>Setting and time:</b><br>- <b>setting:</b> stated<br>- <b>time:</b> Time not<br>specified, only<br>year<br><br><b>Eligibility</b><br><b>criteria:</b><br>Stated<br><br><b>Statistical</b><br><b>analysis:</b><br>Not stated<br>statistical test<br>used<br><br><b>Other:</b><br>Some references<br>quoted in the text<br>do not appear in<br>"References".<br><br><b>Sample</b><br><b>selection:</b><br>convenience | Correctly<br>synthesize<br>d and<br>described:<br>Yes | Are<br>conclusions<br>justified? Yes | <b>Is it</b><br><b>described</b><br><b>?</b><br><b>No</b> | <b>Are results</b><br><b>generalisabl</b><br><b>e to the</b><br><b>general</b><br><b>population?</b><br><b>No, it's a</b><br><b>convenienc</b><br><b>e sample</b> | <b>MEDIUM</b>                                  |



| REFERENCE      | RESEARCH QUESTION                                                                                                                                                                     | METHODOLOGY                                                                                                                                                                                                                                                    | RESULTS                                      | CONCLUSIONS                    | CONFLICT OF INTEREST | EXTERNAL VALIDITY                                        | QUALITY OF THE STUDY |
|----------------|---------------------------------------------------------------------------------------------------------------------------------------------------------------------------------------|----------------------------------------------------------------------------------------------------------------------------------------------------------------------------------------------------------------------------------------------------------------|----------------------------------------------|--------------------------------|----------------------|----------------------------------------------------------|----------------------|
| Author/year    | (population/intervention/ outcome)                                                                                                                                                    |                                                                                                                                                                                                                                                                |                                              |                                |                      |                                                          | High/medium/low      |
| DO et al. 2020 | <b>Population:</b><br><b>12 and 15 years old</b><br><br><b>Intervention:</b><br><b>Questionnaire</b><br><br><b>Outcomes:</b><br><b>Impact prevalence;</b><br><b>Mean C-OIDP score</b> | Study design: Cross sectional<br>Objectives: Stated<br>Setting and time: - setting: stated<br>- time: 2011<br>Eligibility criteria: Stated<br>Statistical analysis: Chi square test, Fisher test, Mann Whitney test<br>Others: Examiner's calibration not done | Correctly synthesize d and described?<br>Yes | Are conclusions justified? Yes | Is it described? Yes | Are results generalisable to the general population? Yes | HIGH                 |
|                | YES                                                                                                                                                                                   | YES                                                                                                                                                                                                                                                            | YES                                          | YES                            | YES                  | YES                                                      | HIGH                 |

| REFERENCE              | RESEARCH QUESTION<br>(population/intervention/ outcome)                                                                                              | METHODOLOGY                                                                                                                                                                                                                                                                                                           | RESULTS                                     | CONCLUSIONS                             | CONFLICT OF INTEREST   | EXTERNAL VALIDITY                                                                     | QUALITY OF THE STUDY<br>High/medium/Low |
|------------------------|------------------------------------------------------------------------------------------------------------------------------------------------------|-----------------------------------------------------------------------------------------------------------------------------------------------------------------------------------------------------------------------------------------------------------------------------------------------------------------------|---------------------------------------------|-----------------------------------------|------------------------|---------------------------------------------------------------------------------------|-----------------------------------------|
| DUMITRACHE et al. 2009 | <b>Population:</b><br><b>11-13 years old</b><br><br><b>Intervention:</b><br><b>Questionnaire</b><br><br><b>Outcomes:</b><br><b>Impact prevalence</b> | Study design:<br>Cross sectional<br><br>Objectives:<br>Stated<br><br>Setting and time:<br>- setting: stated<br>- time: not stated<br><br>Eligibility criteria:<br>Not stated<br><br>Statistical analysis:<br>statistical tests<br>not described<br><br>Others:<br>Several mistakes in English text; random selection. | Correctly synthesized and described:<br>Yes | Are conclusions justified?<br>Partially | Is it described?<br>No | Are results generalisable to the general population?<br>No, it's a convenience sample | LOW                                     |
|                        | PARTIALLY                                                                                                                                            | NO                                                                                                                                                                                                                                                                                                                    | YES                                         | PARTIALLY                               | NO                     | NO                                                                                    | LOW                                     |

| REFERENCE         | RESEARCH QUESTION                                                                                                                                                                                                                                                                                   | METHODOLOGY                                                                                                                                                                                                                                                                                                                                                                                                                                                                                                                 | RESULTS                                                 | CONCLUSIONS                           | CONFLICT OF INTEREST              | EXTERNAL VALIDITY                                                      | QUALITY OF THE STUDY |
|-------------------|-----------------------------------------------------------------------------------------------------------------------------------------------------------------------------------------------------------------------------------------------------------------------------------------------------|-----------------------------------------------------------------------------------------------------------------------------------------------------------------------------------------------------------------------------------------------------------------------------------------------------------------------------------------------------------------------------------------------------------------------------------------------------------------------------------------------------------------------------|---------------------------------------------------------|---------------------------------------|-----------------------------------|------------------------------------------------------------------------|----------------------|
| Author/year       | (population/intervention/ outcome)                                                                                                                                                                                                                                                                  |                                                                                                                                                                                                                                                                                                                                                                                                                                                                                                                             |                                                         |                                       |                                   |                                                                        | High/medium/low      |
| KUMAR et al. 2015 | <p><b>Population:</b><br/><b>12 - 15 years old</b></p> <p><b>Intervention:</b><br/>Clinical exam; C-OIDP; questionnaire with sociodemographic and oral health related behaviours data</p> <p><b>Outcomes:</b><br/><b>Impact prevalence; mean C-OIDP by performance (not overall mean score)</b></p> | <p><b>Study design:</b><br/>Cross-sectional</p> <p><b>Objectives:</b><br/>Stated</p> <p><b>Setting and time:</b><br/>- <b>setting:</b> stated<br/>- <b>time:</b> June and July 2014</p> <p><b>Eligibility criteria:</b><br/>Stated</p> <p><b>Statistical analysis:</b><br/>ANOVA, t-test; bivariate analysis; multiple logistic regression analysis</p> <p><b>Other:</b><br/>Sample size calculation: based on prevalence of dental caries; no more info. Examiner was calibrated. 2 staged cluster sampling technique.</p> | <p>Correctly synthesize d and described?</p> <p>Yes</p> | <p>Are conclusions justified? Yes</p> | <p>Is it described?</p> <p>No</p> | <p>Are results generalisable to the general population?</p> <p>Yes</p> | MEDIUM               |



|                                |           |     |     |    |     |        |
|--------------------------------|-----------|-----|-----|----|-----|--------|
| Schools were randomly selected |           |     |     |    |     |        |
| YES                            | PARTIALLY | YES | YES | NO | YES | MEDIUM |

| REFERENCE<br>Author/year | RESEARCH QUESTION<br>(population/intervention/ outcome)                                                                                                  | METHODOLOGY                                                                                                                                                                                                                                           | RESULTS                                      | CONCLUSIONS                    | CONFLICT OF INTEREST   | EXTERNAL VALIDITY                                                                                           | QUALITY OF THE STUDY<br>High/medium/low |
|--------------------------|----------------------------------------------------------------------------------------------------------------------------------------------------------|-------------------------------------------------------------------------------------------------------------------------------------------------------------------------------------------------------------------------------------------------------|----------------------------------------------|--------------------------------|------------------------|-------------------------------------------------------------------------------------------------------------|-----------------------------------------|
| MARCEL O et al. 2015     | <b>Population:</b><br>11 and 12 years old<br><br><b>Intervention:</b><br>Questionnaire<br><br><b>Outcome:</b><br>Mean C-OIDP score;<br>Impact prevalence | Study design:<br>Cross sectional<br><br>Objectives:<br>Stated<br><br>Setting and time:<br>- <b>setting:</b> stated<br>- <b>time:</b> August and September 2013<br><br>Eligibility criteria:<br>inclusion criteria stated<br><br>Statistical analysis: | Correctly synthesize d and described?<br>Yes | Are conclusions justified? Yes | Is it described?<br>No | Are results generalisable to the general population?<br>No. Not homogeneous sample, only internal validity. | HIGH                                    |

|  |     |                                                              |     |     |    |    |      |
|--|-----|--------------------------------------------------------------|-----|-----|----|----|------|
|  |     | Chi square test<br>and Mann<br>Whitney U test                |     |     |    |    |      |
|  |     | <b>Other:</b><br>Some misprint<br>wording in<br>Spanish text |     |     |    |    |      |
|  | YES | YES                                                          | YES | YES | NO | NO | HIGH |

| REFE-<br>RENCE                    | RESEARCH<br>QUESTION<br>(population/interventi<br>on/ outcome)                                                                                                 | METHODOLO<br>GY                                                                                                                                        | RESULTS                                               | CONCLUSIO<br>NS                               | CONFLIC<br>T OF<br>INTERES<br>T          | EXTERNAL<br>VALIDITY                                                                | QUALITY OF<br>THE STUDY<br>High/medium/lo<br>w |
|-----------------------------------|----------------------------------------------------------------------------------------------------------------------------------------------------------------|--------------------------------------------------------------------------------------------------------------------------------------------------------|-------------------------------------------------------|-----------------------------------------------|------------------------------------------|-------------------------------------------------------------------------------------|------------------------------------------------|
| <b>MORENO<br/>et al.<br/>2014</b> | <b>Population:</b><br><b>11 - 14 years old</b><br><br><b>Intervention:</b><br>Questionnaire<br><br><b>Outcomes:</b><br>Mean C-OIDP score;<br>Impact prevalence | Study design:<br>Cross sectional<br><br>Objectives:<br>Stated<br><br>Setting and time:<br>- <b>setting:</b> stated<br>- <b>time:</b> September<br>2013 | Correctly<br>synthesize<br>d and<br>described?<br>Yes | Are<br>conclusions<br>justified?<br>Partially | <b>Is it<br/>described<br/>?<br/>Yes</b> | <b>Are results<br/>generalisabl<br/>e to the<br/>general<br/>population?<br/>No</b> | <b>MEDIUM</b>                                  |

|                                                                                                                                                                                                                                                                                      |  |  |  |  |  |  |  |
|--------------------------------------------------------------------------------------------------------------------------------------------------------------------------------------------------------------------------------------------------------------------------------------|--|--|--|--|--|--|--|
| <p><b>Eligibility criteria:</b><br/>Not stated</p> <p><b>Statistical analysis:</b><br/>Not-parametric tests; Chi square test, Mann Whitney U test and Kruskal Wallis</p> <p><b>Other:</b><br/>Do not mention study limitations, sample selection method, sample size calculation</p> |  |  |  |  |  |  |  |
|--------------------------------------------------------------------------------------------------------------------------------------------------------------------------------------------------------------------------------------------------------------------------------------|--|--|--|--|--|--|--|

YES

PARTIALLY

YES

PARTIALLY

YES

NO

MEDIUM

| REFERENCE          | RESEARCH QUESTION                                                                                                                         | METHODOLOGY                                                                                                                                  | RESULTS                                                | CONCLUSIONS                                  | CONFLICT OF INTEREST               | EXTERNAL VALIDITY                                                                                                                                        | QUALITY OF THE STUDY |
|--------------------|-------------------------------------------------------------------------------------------------------------------------------------------|----------------------------------------------------------------------------------------------------------------------------------------------|--------------------------------------------------------|----------------------------------------------|------------------------------------|----------------------------------------------------------------------------------------------------------------------------------------------------------|----------------------|
| Author/year        | (population/intervention/ outcome)                                                                                                        |                                                                                                                                              |                                                        |                                              |                                    |                                                                                                                                                          | High/medium/low      |
| NAIDOO et al. 2013 | <p><b>Population:</b><br/>11-13 years old</p> <p><b>Intervention:</b><br/>Questionnaire</p> <p><b>Outcomes:</b><br/>Impact prevalence</p> | <p>Study design:<br/>Cross sectional</p> <p>Objectives:<br/>Stated</p> <p>Setting and time:<br/>- setting: stated<br/>- time: not stated</p> | <p>Correctly synthesized and described?</p> <p>Yes</p> | <p>Are conclusions justified?</p> <p>Yes</p> | <p>Is it described?</p> <p>Yes</p> | <p>Are results generalisable to the general population?</p> <p>No. Sample belongs to low socioeconomic level, it is not representative of the entire</p> | MEDIUM               |

|  |                                                                                                                                                                                                                                              |           |     |     |     |                                                     |        |
|--|----------------------------------------------------------------------------------------------------------------------------------------------------------------------------------------------------------------------------------------------|-----------|-----|-----|-----|-----------------------------------------------------|--------|
|  | <p><b>Eligibility criteria:</b></p> <p>Not stated</p>                                                                                                                                                                                        |           |     |     |     | <p><b>country</b></p> <p><b>(South Africa).</b></p> |        |
|  | <p><b>Statistical analysis:</b></p> <p>Chi square test and Mann Whitney U test.</p> <p>Only bivariate analysis and not multivariate</p>                                                                                                      |           |     |     |     |                                                     |        |
|  | <p><b>Other:</b></p> <p>Random selection of schools participating.</p> <p>3 examiners were calibrated.</p> <p>Intra and inter-examiner reliability was assessed.</p> <p>They compare index outcome obtained, with studies done in adults</p> |           |     |     |     |                                                     |        |
|  | PARTIALLY                                                                                                                                                                                                                                    | PARTIALLY | YES | YES | YES | NO                                                  | MEDIUM |

| REFE-<br>RENCE                    | RESEARCH<br>QUESTION<br>(population/interventi<br>on/ outcome)                                                                                                     | METHODOLO<br>GY                                                                                                                                                                                                                                                                                                                                                                                                                                                                                                                                      | RESULTS                                               | CONCLUSIO<br>NS                               | CONFLIC<br>T OF<br>INTERES<br>T          | EXTERNAL<br>VALIDITY                                                                                                                                                          | QUALITY OF<br>THE STUDY<br>High/medium/lo<br>w |
|-----------------------------------|--------------------------------------------------------------------------------------------------------------------------------------------------------------------|------------------------------------------------------------------------------------------------------------------------------------------------------------------------------------------------------------------------------------------------------------------------------------------------------------------------------------------------------------------------------------------------------------------------------------------------------------------------------------------------------------------------------------------------------|-------------------------------------------------------|-----------------------------------------------|------------------------------------------|-------------------------------------------------------------------------------------------------------------------------------------------------------------------------------|------------------------------------------------|
| <b>NORDIN<br/>et al.<br/>2019</b> | <b>Population:</b><br><b>11-12 years old</b><br><br><b>Intervention:</b><br><b>Questionnaire</b><br><br><b>Outcome:</b><br>Impact prevalence;<br>Mean C-OIDP score | <b>Study design:</b><br>Cross sectional<br><br><b>Objectives:</b><br>Stated<br><br><b>Setting and time:</b><br>- <b>setting:</b> stated<br>- <b>time:</b> November<br>2014<br><br><b>Eligibility<br/>criteria:</b><br>Stated<br><br><b>Statistical<br/>analysis:</b><br>Distribution of C-<br>OIDP scores was<br>skewed,<br>therefore non<br>parametric tests<br>were used<br>(Kruskal Wallis<br>and Mann<br>Whitney). Also,<br>multiple logistic<br>regression.<br><br><b>Other:</b><br>Sample size<br>determination<br>based on<br>previous impact | Correctly<br>synthesize<br>d and<br>described?<br>Yes | Are<br>conclusions<br>justified?<br>Partially | <b>Is it<br/>described<br/>?<br/>Yes</b> | <b>Are results<br/>generalisabl<br/>e to the<br/>general<br/>population?<br/>No, only to<br/>indigenous<br/>rural<br/>population<br/>where the<br/>sample<br/>comes from.</b> | <b>HIGH</b>                                    |

|     |     |                                                         |           |     |    |      |  |
|-----|-----|---------------------------------------------------------|-----------|-----|----|------|--|
|     |     | prevalence.<br>Pilot study.<br>Examiners<br>calibrated. |           |     |    |      |  |
| YES | YES | YES                                                     | PARTIALLY | YES | NO | HIGH |  |

| REFERENCE           | RESEARCH QUESTION<br>(population/intervention/ outcome)                                                                                       | METHODOLOGY                                                                                                                     | RESULTS                                     | CONCLUSIONS                             | CONFLICT OF INTEREST   | EXTERNAL VALIDITY                                                                                                                                         | QUALITY OF THE STUDY<br>High/medium/Low |
|---------------------|-----------------------------------------------------------------------------------------------------------------------------------------------|---------------------------------------------------------------------------------------------------------------------------------|---------------------------------------------|-----------------------------------------|------------------------|-----------------------------------------------------------------------------------------------------------------------------------------------------------|-----------------------------------------|
| Author/year         |                                                                                                                                               |                                                                                                                                 |                                             |                                         |                        |                                                                                                                                                           |                                         |
| PAREDES et al. 2014 | <b>Population:</b><br><b>11-12 years old</b><br><br><b>Intervention:</b><br><b>Questionnaire</b><br><br><b>Outcomes:</b><br>Impact prevalence | Study design:<br>Cross sectional<br><br>Objectives:<br>Stated<br><br>Setting and time:<br>- setting: not stated<br>- time: 2013 | Correctly synthesized and described?<br>Yes | Are conclusions justified?<br>Partially | Is it described?<br>No | Are results generalisable to the general population?<br>Partially; they do not explain representativeness of the sample neither sample selection process. | MEDIUM                                  |

|                                                                                                                                                                                                                   |           |     |           |    |           |        |
|-------------------------------------------------------------------------------------------------------------------------------------------------------------------------------------------------------------------|-----------|-----|-----------|----|-----------|--------|
| <p><b>Eligibility criteria:</b><br/>Stated</p> <p><b>Statistical analysis:</b><br/>“sample was obtained statistically”, they do not explain how it was obtained</p> <p><b>Other:</b><br/>Pilot study was done</p> |           |     |           |    |           |        |
| PARTIALLY                                                                                                                                                                                                         | PARTIALLY | YES | PARTIALLY | NO | PARTIALLY | MEDIUM |

| REFERENCE             | RESEARCH QUESTION                                                                                                             | METHODOLOGY                                                                                    | RESULTS                                                 | CONCLUSIONS                           | CONFLICT OF INTEREST                | EXTERNAL VALIDITY                                                                          | QUALITY OF THE STUDY |
|-----------------------|-------------------------------------------------------------------------------------------------------------------------------|------------------------------------------------------------------------------------------------|---------------------------------------------------------|---------------------------------------|-------------------------------------|--------------------------------------------------------------------------------------------|----------------------|
| Author/year           | (population/intervention/ outcome)                                                                                            |                                                                                                |                                                         |                                       |                                     |                                                                                            | High/medium/low      |
| PAVITRA N et al. 2020 | <p><b>Population:</b><br/>12-15 years old</p> <p><b>Intervention:</b><br/>demographic questionnaire; C-OIDP questionnaire</p> | <p>Study design: Cross sectional analytical study</p> <p><b>Objectives:</b><br/>Not stated</p> | <p>Correctly synthesize d and described?</p> <p>Yes</p> | <p>Are conclusions justified? Yes</p> | <p>Is it described ?</p> <p>Yes</p> | <p>Are results generalisable to the general population?</p> <p>Yes. Author states good</p> | HIGH                 |

|                           |                          |                 |
|---------------------------|--------------------------|-----------------|
| <b>Outcomes:</b>          | <b>Setting and time:</b> | <b>external</b> |
| <b>Impact prevalence;</b> | - <b>setting:</b> not    | <b>validity</b> |
| <b>Mean C-OIDP score;</b> | stated                   |                 |
| Describes null and        | - <b>time:</b> March to  |                 |
| alternative hypothesis    | July 2014                |                 |
|                           | <b>Eligibility</b>       |                 |
|                           | <b>criteria:</b>         |                 |
|                           | Stated                   |                 |
|                           | <b>Statistical</b>       |                 |
|                           | <b>analysis:</b>         |                 |
|                           | descriptive              |                 |
|                           | statistics;              |                 |
|                           | association              |                 |
|                           | analysis: Chi-           |                 |
|                           | square test, Mann        |                 |
|                           | Whitney U test           |                 |
|                           | (comparison of           |                 |
|                           | mean C-OIDP              |                 |
|                           | score between 2          |                 |
|                           | groups); bivariate       |                 |
|                           | association with         |                 |
|                           | ANOVA. One-              |                 |
|                           | way analysis of          |                 |
|                           | variance, Step-          |                 |
|                           | wise multiple            |                 |
|                           | linear regression        |                 |
|                           | <b>Other:</b>            |                 |
|                           | Ethical                  |                 |
|                           | Committee                |                 |
|                           | clearance with           |                 |
|                           | specific number.         |                 |
|                           | Study presents           |                 |
|                           | information              |                 |
|                           | based on Strobe          |                 |
|                           | statement 2007           |                 |
|                           | checklist.               |                 |
|                           | Examiner trained         |                 |
|                           | and calibrated,          |                 |
|                           | intra-examiner           |                 |



|  |     |     |     |     |     |     |                                                                                                                                                                                                                                                                                                                            |
|--|-----|-----|-----|-----|-----|-----|----------------------------------------------------------------------------------------------------------------------------------------------------------------------------------------------------------------------------------------------------------------------------------------------------------------------------|
|  |     |     |     |     |     |     | reliability<br>assessed.<br>Pilot study done.<br>Formula for<br>calculation of<br>sample size.<br>Simple random<br>sampling<br>technique for<br>choosing<br>orphanages and<br>convenience<br>selection for non<br>orphanages<br>participants.<br>Oral health<br>education<br>program was<br>conducted after<br>examination |
|  | YES | YES | YES | YES | YES | YES | HIGH                                                                                                                                                                                                                                                                                                                       |

| REFE-<br>RENCE            | RESEARCH<br>QUESTION<br>(population/interventi<br>on/ outcome)                                                                               | METHODOLO<br>GY                                                                                                                                          | RESULTS                                               | CONCLUSIO<br>NS                      | CONFLIC<br>T OF<br>INTERES<br>T   | EXTERNAL<br>VALIDITY                                                                                                                 | QUALITY OF<br>THE STUDY<br>High/medium/lo<br>w |
|---------------------------|----------------------------------------------------------------------------------------------------------------------------------------------|----------------------------------------------------------------------------------------------------------------------------------------------------------|-------------------------------------------------------|--------------------------------------|-----------------------------------|--------------------------------------------------------------------------------------------------------------------------------------|------------------------------------------------|
| REINOSO<br>et al.<br>2017 | <b>Population:</b><br><b>11-12 years old</b><br><br><b>Intervention:</b><br><b>Questionnaire</b><br><br><b>Outcome:</b><br>Impact prevalence | Study design:<br>Cross sectional<br><br>Objectives:<br>Stated<br><br>Setting and time:<br>- <b>setting:</b> stated<br>- <b>time:</b> May to<br>July 2015 | Correctly<br>synthesize<br>d and<br>described?<br>Yes | Are<br>conclusions<br>justified? Yes | Is it<br>described<br>?<br><br>No | Are results<br>generalisabl<br>e to the<br>general<br>population?<br>Partially,<br>only<br>generalizabl<br>e to study<br>population. | MEDIUM                                         |

|                                                                                                                                                                                                                                                                                                    |           |     |     |    |           |        |  |
|----------------------------------------------------------------------------------------------------------------------------------------------------------------------------------------------------------------------------------------------------------------------------------------------------|-----------|-----|-----|----|-----------|--------|--|
| <p><b>Eligibility criteria:</b></p> <p>Stated</p> <p><b>Statistical analysis:</b></p> <p>Impact extent (Ude Mann Whitney); Impact intensity (Chi square test and Fisher exact test).</p> <p><b>Other:</b></p> <p>Examiner calibration; Pilot study; Do not explain sample selection technique.</p> |           |     |     |    |           |        |  |
| YES                                                                                                                                                                                                                                                                                                | PARTIALLY | YES | YES | NO | PARTIALLY | MEDIUM |  |

| REFE-<br>RENCE<br><br>Author/year | RESEARCH<br>QUESTION<br><br>(population/intervention/ outcome)                       | METHODOLOGY                                                                                   | RESULTS                                            | CONCLUSIONS                           | CONFLICT OF INTEREST        | EXTERNAL VALIDITY                                                                                                        | QUALITY OF THE STUDY<br><br>High/medium/low |
|-----------------------------------|--------------------------------------------------------------------------------------|-----------------------------------------------------------------------------------------------|----------------------------------------------------|---------------------------------------|-----------------------------|--------------------------------------------------------------------------------------------------------------------------|---------------------------------------------|
| <b>SIMANGWA et al. 2020</b>       | <b>Population:</b><br><b>12-17 years old</b>                                         | <b>Study design:</b><br>Cross sectional                                                       | <b>Correctly synthesized and described?</b><br>Yes | <b>Are conclusions justified?</b> Yes | <b>Is it described?</b> Yes | <b>Are results generalisable to the general population?</b><br><b>Partially (due to very strict inclusion criteria).</b> | <b>HIGH</b>                                 |
|                                   | <b>Intervention:</b><br>clinical exam; questionnaire;<br>Kiswahili version of C-OIDP | <b>Objectives:</b><br>Stated                                                                  |                                                    |                                       |                             |                                                                                                                          |                                             |
|                                   |                                                                                      | <b>Setting and time:</b><br>- <b>setting:</b> stated<br>- <b>time:</b> June to November 2016. |                                                    |                                       |                             |                                                                                                                          |                                             |

**Outcomes:****Impact prevalence:** EligibilityWealth index (PCA: **criteria:**

principal component Stated

analysis method);

Simplified oral hygiene **Statistical**index (OHI-S); Gingival **analysis:**

bleeding index; Dental bivariate analysis

caries assessed by with Pearson Chi

WHO criteria (Basic square test;

methods 2013); Dental Stepwise

fluorosis assessed by TF multiple variable

index. logistic

regression

analysis.

**Other:**

One stage cluster

sample design.

Sample size

estimation based

on prevalence of

dental erosion.

Examiner trained

and calibrated.

Inter-examiner

assessment for

dental erosion.

Intra-examiner

concordance

done.

YES

YES

YES

YES

YES

PARTIALLY

HIGH

| REFERENCE         | RESEARCH QUESTION                                                                                                                             | METHODOLOGY                                                                                                                                                                                                                                                                                                                                                                                                                            | RESULTS                                     | CONCLUSIONS                       | CONFLICT OF INTEREST                  | EXTERNAL VALIDITY                                                                                                                                                 | QUALITY OF THE STUDY |
|-------------------|-----------------------------------------------------------------------------------------------------------------------------------------------|----------------------------------------------------------------------------------------------------------------------------------------------------------------------------------------------------------------------------------------------------------------------------------------------------------------------------------------------------------------------------------------------------------------------------------------|---------------------------------------------|-----------------------------------|---------------------------------------|-------------------------------------------------------------------------------------------------------------------------------------------------------------------|----------------------|
| Author/year       | (population/intervention/ outcome)                                                                                                            |                                                                                                                                                                                                                                                                                                                                                                                                                                        |                                             |                                   |                                       |                                                                                                                                                                   | High/medium/low      |
| VELEZ et al. 2019 | <b>Population:</b><br><b>11-12 years old</b><br><br><b>Intervention:</b><br><b>Questionnaire</b><br><br><b>Outcomes:</b><br>Impact prevalence | <b>Study design:</b><br>Cross sectional<br><br><b>Objectives:</b><br>Stated<br><br><b>Setting and time:</b><br>- <b>setting:</b> stated<br>- <b>time:</b> not stated<br><br><b>Eligibility criteria:</b><br>Stated<br><br><b>Statistical analysis:</b><br>Chi square test;<br>Pearson R;<br>simple correspondence analysis.<br><br><b>Other:</b><br>Sample selection randomised, stratified and proportional.<br>Examiner calibration. | Correctly synthesized and described?<br>Yes | Are conclusions justified?<br>Yes | <b>Is it described?</b><br><b>Yes</b> | <b>Are results generalisable to the general population?</b><br><b>Partially; it is not clear if they did stratification based on parents socioeconomic level.</b> | <b>HIGH</b>          |
|                   |                                                                                                                                               |                                                                                                                                                                                                                                                                                                                                                                                                                                        | YES                                         | YES                               | YES                                   | PARTIALLY                                                                                                                                                         | HIGH                 |

| REFE-<br>RENCE              | RESEARCH<br>QUESTION<br>(population/interventi<br>on/ outcome)                                                                                                                                                                                                                                                                                                                                                                                                                                                      | METHODOLO<br>GY                                                                                                                                                                                                                                                                                                                                                                                                                                                                          | RESULTS                                               | CONCLUSIO<br>NS                               | CONFLIC<br>T OF<br>INTERES<br>T                           | EXTERNAL<br>VALIDITY                                                                                              | QUALITY OF<br>THE STUDY<br>High/medium/lo<br>w |
|-----------------------------|---------------------------------------------------------------------------------------------------------------------------------------------------------------------------------------------------------------------------------------------------------------------------------------------------------------------------------------------------------------------------------------------------------------------------------------------------------------------------------------------------------------------|------------------------------------------------------------------------------------------------------------------------------------------------------------------------------------------------------------------------------------------------------------------------------------------------------------------------------------------------------------------------------------------------------------------------------------------------------------------------------------------|-------------------------------------------------------|-----------------------------------------------|-----------------------------------------------------------|-------------------------------------------------------------------------------------------------------------------|------------------------------------------------|
| YETKINE<br>R et al.<br>2014 | <b>Population:</b><br><b>13-14 years old</b><br><br><b>Intervention:</b><br>clinical exam;<br>questionnaire;<br>interview<br><br><b>Outcomes:</b><br><b>Impact prevalence;</b><br><b>Mean C-OIDP score</b><br><b>per dimensions;</b><br><b>IOTN-DHC (index of</b><br><b>orthodontic</b><br><b>treatment need</b><br><b>dental component).</b><br><b>IOTN-AC (index of</b><br><b>orthodontic</b><br><b>treatment need</b><br><b>aesthetic</b><br><b>component).</b><br><b>Rosenberg self-</b><br><b>esteem scale</b> | <b>Study design:</b><br>Cross sectional<br><br><b>Objectives:</b><br>Stated<br><br><b>Setting and time:</b><br>- <b>setting:</b> stated<br>- <b>time:</b> not stated<br><br><b>Eligibility</b><br><b>criteria:</b><br>Stated<br><br><b>Statistical</b><br><b>analysis:</b><br>Spearman rho;<br>Kruskal Wallis<br>test; Chi-square<br>test.<br><br><b>Other:</b><br>Inter-operator<br>and intra-<br>operator<br>reliability tested.<br>Sample size and<br>selection method<br>not stated. | Correctly<br>synthesize<br>d and<br>described?<br>Yes | Are<br>conclusions<br>justified?<br>Partially | <b>Is it</b><br><b>described</b><br><b>?</b><br><b>No</b> | <b>Are results</b><br><b>generalisabl</b><br><b>e to the</b><br><b>general</b><br><b>population?</b><br><b>No</b> | MEDIUM                                         |
| YES                         |                                                                                                                                                                                                                                                                                                                                                                                                                                                                                                                     | PARTIALLY                                                                                                                                                                                                                                                                                                                                                                                                                                                                                | YES                                                   | PARTIALLY                                     | NO                                                        | NO                                                                                                                | MEDIUM                                         |
